# Supplementary material for: Catalytic asymmetric Povarov reaction of isatin-derived 2-azadienes with 3-vinylindoles
Source: Royal Society of Chemistry journal article supplement (doi:10.1039/c4ob01741b), 2014-10-02

## *Supporting Information for*

### **Catalytic Asymmetric Povarov Reaction of Isatin-derived 2-Azadienes with 3-Vinylindoles**

Hong-Hao Zhang, Xiao-Xue Sun, Jing Liang, Yue-Ming Wang, Chang-Chun Zhao\*  
and Feng Shi\*

*School of Chemistry & Chemical Engineering, and Jiangsu Key Laboratory of Green  
Synthetic Chemistry for Functional Materials, Jiangsu Normal University, Xuzhou,  
221116, China*

*E-mail: [fshi@jsnu.edu.cn](mailto:fshi@jsnu.edu.cn) and [zcch@163.com](mailto:zcch@163.com)*

#### **Contents:**

- 1. General information (S2)**
- 2. General procedure for the catalytic asymmetric Povarov reaction (S2)**
- 3. General procedure for the racemic Povarov reaction (S3)**
- 4. Characterization of compounds 3 (S3-S15)**
- 5. X-ray single crystal data for compound 3aa (S16)**
- 6. NMR Spectra of products 3 (S17-S36)**
- 7. HPLC Spectra of products 3 (S37-S56)**

## General information:

NMR spectra were measured respectively at 400 and 100 MHz, respectively. The solvent used for NMR spectroscopy was CDCl<sub>3</sub>, using tetramethylsilane as the internal reference. HRMS (ESI) was determined by a micrOTOF-Q II HRMS/MS instrument (Bruker). Enantiomeric ratios (*er*) were determined by chiral high-performance liquid chromatography (chiral HPLC). The chiral columns used for the determination of enantiomeric excesses by chiral HPLC were Chiralpak AD-H and IA columns. Optical rotation values were measured with instruments operating at  $\lambda = 589$  nm, corresponding to the sodium D line at the temperatures indicated. Analytic grade solvents for the column chromatography and commercially available reagents were used as received. All starting materials commercially available were used directly. Substrates **1** and **2** were synthesized according to the literature methods.<sup>1</sup>

## General procedure for the catalytic asymmetric Povarov reaction:

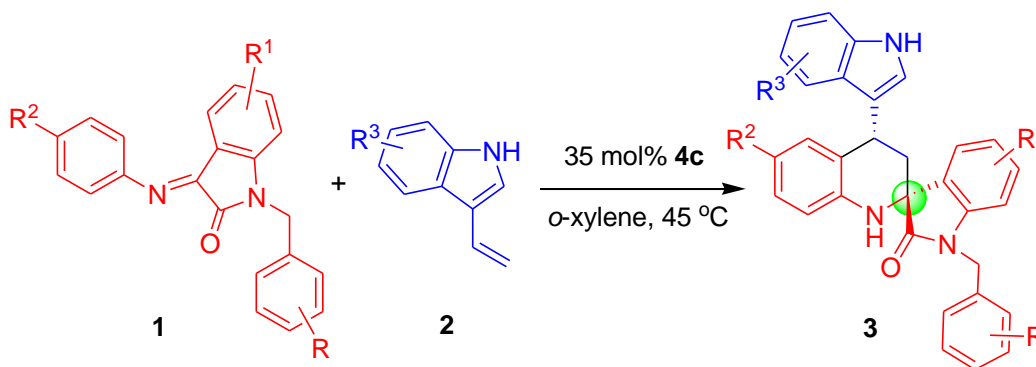

To the stirred solution of isatin-derived 2-azadienes **1** (0.1 mmol) and the catalyst **4c** (0.035 mmol) in *o*-xylene (2 mL) at 45 °C, the solution of 3-vinylindoles **2** (0.3 mmol) in a mixed solvent of *o*-xylene (0.8 mL) and 1,4-dioxane (0.2 mL) was added dropwise by syringe pump for 10 h. After completing the addition of 3-vinylindoles **2**, the reaction mixture was stirred for another one hour. The resultant

1. a) Sun, C.; Lin, X.; Weinreb, S. M. *J. Org. Chem.* 2006, 71, 3159; b) Gioia, C.; Hauville, A.; Bernardi, L.; Fini, F.; Ricci, A. *Angew. Chem. Int. Ed.* 2008, 47, 9236; c) Scott, M. S.; Lucas, A. C.; Luckhurst, C. A.; Prodger, J. C.; Dixon, D. J. *Org. Biomol. Chem.* 2006, 4, 1313.

solution was concentrated under the reduced pressure to give the residue, which was purified through flash column chromatography on silica gel to afford pure spiro-product **3**.

### General procedure for the racemic Povarov reaction:

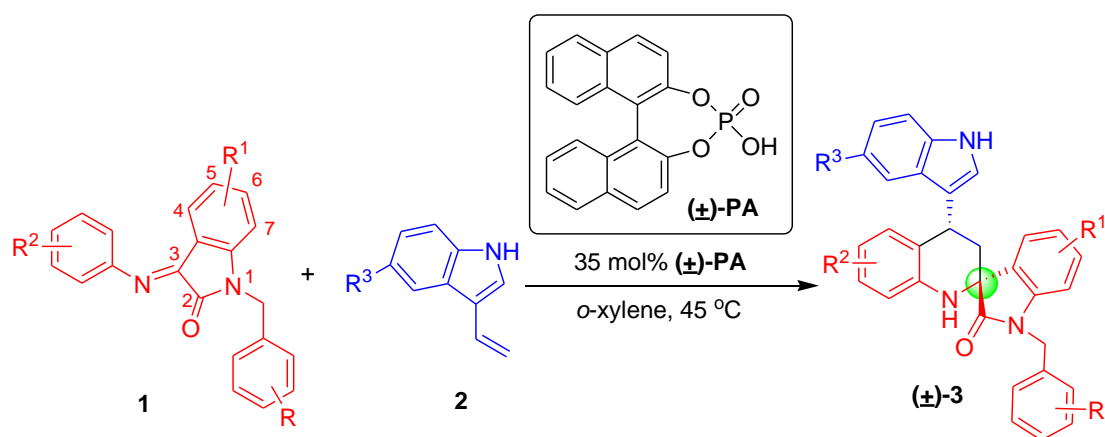

To the stirred solution of isatin-derived 2-azadienes **1** (0.1 mmol) and the racemic phosphoric acid (0.035 mmol) in *o*-xylene (2 mL) at 45 °C, the solution of 3-vinylindoles **2** (0.3 mmol) in a mixed solvent of *o*-xylene (0.8 mL) and 1,4-dioxane (0.2 mL) was added dropwise by syringe pump for 10 h. After completing the addition of 3-vinylindoles **2**, the reaction mixture was stirred for another one hour. The resultant solution was concentrated under the reduced pressure to give the residue, which was purified through flash column chromatography on silica gel to afford pure spiro-product **(±)-3**. These products were used as racemic standards for HPLC determination.

### Characterization of compounds **3**:

**(2'R,4'S)-1-benzyl-4'-(1H-indol-3-yl)-6'-methoxy-3',4'-dihydro-1'H-spiro[indoline-3,2'-quinolin]-2-one (3aa)**: Flash column chromatography eluent, petroleum ether/ethyl acetate = 6/1; Reaction time = 11 h; yield: 68% (33.1 mg); >95:5 dr; yellow solid;  $[\alpha]_D^{20} = +132.7$  (c 0.59, Acetone);  $^1\text{H NMR}$  (400 MHz,  $\text{CDCl}_3$ )  $\delta$  (ppm): 8.06 (s, 1H), 7.46 (d,  $J = 7.8$  Hz, 1H), 7.39 – 7.36 (m, 2H), 7.33 (d,  $J = 4.3$  Hz, 4H), 7.31 – 7.26 (m, 1H), 7.20 – 7.15 (m, 3H), 7.07 – 7.00 (m, 2H), 6.72 (d,  $J = 7.8$  Hz,

1H), 6.66 (dd,  $J = 8.5, 2.9$  Hz, 1H), 6.61 – 6.54 (m, 2H), 5.17 (dd,  $J = 12.6, 5.2$  Hz, 1H), 5.00 – 4.81 (m, 2H), 4.03 (s, 1H), 3.55 (s, 3H), 2.68 (t,  $J = 13.1$  Hz, 1H), 2.20 (dd,  $J = 13.7, 5.3$  Hz, 1H);  $^{13}\text{C}$  NMR (100 MHz,  $\text{CDCl}_3$ )  $\delta$  (ppm): 179.1, 152.4, 142.1, 136.7, 136.3, 136.0, 132.0, 129.3, 128.9, 127.7, 127.4, 125.4, 123.6, 123.0, 122.8, 121.9, 119.9, 119.3, 117.8, 114.7, 113.2, 111.3, 109.2, 60.1, 55.8, 43.7, 39.0, 30.7; IR (KBr): 3646, 3309, 2922, 2360, 1702, 1607, 1497, 1351, 1289, 1231, 1173, 1098, 1037, 986, 858, 808, 741, 697, 669  $\text{cm}^{-1}$ ; ESI FTMS exact mass calcd for  $(\text{C}_{32}\text{H}_{27}\text{N}_3\text{O}_2\text{-H})^-$  requires  $m/z$  484.2020, found  $m/z$  484.2026; Enantiomeric ratio: 84:16, determined by HPLC (Daicel Chirapak IA, hexane/ isopropanol = 70/ 30, flow rate 1.0 mL/min,  $T = 30$  °C, 254 nm):  $t_R = 9.21$  min (minor),  $t_R = 10.37$  min (major).

**(2'R,4'S)-1-(4-(tert-butyl)benzyl)-4'-(1H-indol-3-yl)-6'-methoxy-3',4'-dihydro-1'H-spiro[indoline-3,2'-quinolin]-2-one (3ba):** Flash column chromatography eluent, petroleum ether/ethyl acetate = 6/1; Reaction time = 11 h; yield: 50% (27.1 mg); >95:5 dr; yellow sticky oil;  $[\alpha]_D^{20} = +167.9$  (c 0.32, Acetone);  $^1\text{H}$  NMR (400 MHz,  $\text{CDCl}_3$ )  $\delta$  (ppm): 8.12 (s, 1H), 7.47 (d,  $J = 7.9$  Hz, 1H), 7.36 (dd,  $J = 9.4, 6.1$  Hz, 4H), 7.28 (s, 2H), 7.23 – 7.16 (m, 2H), 7.14 (d,  $J = 2.5$  Hz, 1H), 7.07 – 7.00 (m, 2H), 6.77 (d,  $J = 7.8$  Hz, 1H), 6.67 (dd,  $J = 8.5, 2.6$  Hz, 1H), 6.61 – 6.55 (m, 2H), 5.18 (dd,  $J = 12.5, 5.1$  Hz, 1H), 4.93 (d,  $J = 15.5$  Hz, 1H), 4.82 (d,  $J = 15.5$  Hz, 1H), 3.55 (s, 3H), 2.68 (t,  $J = 13.1$  Hz, 1H), 2.21 (dd,  $J = 13.7, 5.3$  Hz, 1H), 1.61 (s, 1H), 1.30 (s, 9H);  $^{13}\text{C}$  NMR (100 MHz,  $\text{CDCl}_3$ )  $\delta$  (ppm): 179.0, 152.4, 150.6, 142.3, 136.7, 136.3, 132.9, 132.0, 129.2, 127.2, 125.7, 123.5, 122.9, 122.6, 121.9, 120.0, 119.3, 118.0, 114.7, 114.6, 113.2, 111.2, 109.2, 60.1, 55.8, 43.3, 39.0, 34.5, 31.3, 30.7, 29.7; IR (KBr): 3651, 3298, 2959, 2360, 1704, 1605, 1628, 1498, 1353, 1264, 1290, 1237, 1174, 1097, 1038, 987, 861, 806, 742  $\text{cm}^{-1}$ ; ESI FTMS exact mass calcd for  $(\text{C}_{36}\text{H}_{35}\text{N}_3\text{O}_2\text{-H})^-$  requires  $m/z$  540.2646, found  $m/z$  540.2673; Enantiomeric ratio: 84:16, determined by HPLC (Daicel Chirapak AD-H, hexane/ isopropanol = 70/ 30, flow rate 1.0 mL/min,  $T = 30$  °C, 254 nm):  $t_R = 7.27$  min (minor),  $t_R = 9.24$  min (major).

**(2'R,4'S)-4'-(1H-indol-3-yl)-6'-methoxy-1-(3-methylbenzyl)-3',4'-dihydro-1'H-spi**

**ro[indoline-3,2'-quinolin]-2-one (3ca):** Flash column chromatography eluent, petroleum ether/ethyl acetate = 6/1; Reaction time = 11 h; yield: 73% (36.7 mg); 81:19 dr; yellow sticky oil;  $[\alpha]_D^{20} = +197.7$  (c 0.31, Acetone);  $^1\text{H}$  NMR (400 MHz,  $\text{CDCl}_3$ )  $\delta$  (ppm): 8.11 (s, 1H), 7.46 (d,  $J = 7.9$  Hz, 1H), 7.40 – 7.34 (m, 2H), 7.25 – 7.12 (m, 6H), 7.12 – 7.07 (m, 1H), 7.06 – 7.00 (m, 2H), 6.74 (d,  $J = 7.8$  Hz, 1H), 6.70 – 6.64 (m, 1H), 6.62 – 6.54 (m, 2H), 5.18 (dd,  $J = 12.5, 5.1$  Hz, 1H), 4.93 (d,  $J = 15.5$  Hz, 1H), 4.81 (d,  $J = 15.5$  Hz, 1H), 4.05 (s, 1H), 3.55 (s, 3H), 2.68 (t,  $J = 13.1$  Hz, 1H), 2.33 (s, 3H), 2.21 (dd,  $J = 13.7, 5.3$  Hz, 1H);  $^{13}\text{C}$  NMR (100 MHz,  $\text{CDCl}_3$ )  $\delta$  (ppm): 179.0, 152.4, 142.2, 138.6, 136.7, 136.3, 135.9, 132.0, 129.3, 128.7, 128.5, 128.2, 126.7, 125.4, 124.5, 123.5, 122.9, 122.6, 121.9, 119.9, 119.3, 118.0, 114.7, 114.6, 113.2, 111.2, 109.2, 60.1, 55.8, 43.7, 39.1, 30.7, 21.5; IR (KBr): 3651, 3319, 2922, 2361, 1698, 1603, 1628, 1499, 1437, 1344, 1291, 1235, 1177, 1098, 1035, 811, 745, 696  $\text{cm}^{-1}$ ; ESI FTMS exact mass calcd for  $(\text{C}_{33}\text{H}_{29}\text{N}_3\text{O}_2\text{-H})^-$  requires  $m/z$  498.2176, found  $m/z$  498.2195; Enantiomeric ratio: 84:16, determined by HPLC (Daicel Chirapak AD-H, hexane/ isopropanol = 70/ 30, flow rate 1.0 mL/min, T = 30  $^\circ\text{C}$ , 254 nm):  $t_R = 9.23$  min (minor),  $t_R = 12.72$  min (major).

**(2'R,4'S)-1-(3-chlorobenzyl)-4'-(1H-indol-3-yl)-6'-methoxy-3',4'-dihydro-1'H-spiro[indoline-3,2'-quinolin]-2-one (3da):** Flash column chromatography eluent, petroleum ether/ethyl acetate = 6/1; Reaction time = 11 h; yield: 60% (31.2 mg); >95:5 dr; yellow sticky oil;  $[\alpha]_D^{20} = +43.3$  (c 0.80,  $\text{CHCl}_3$ );  $^1\text{H}$  NMR (400 MHz,  $\text{CDCl}_3$ )  $\delta$  (ppm): 8.11 (s, 1H), 7.45 (d,  $J = 8.0$  Hz, 1H), 7.41 – 7.34 (m, 2H), 7.29 (dd,  $J = 7.9, 5.5$  Hz, 4H), 7.23 – 7.16 (m, 2H), 7.14 (dd,  $J = 6.5, 1.6$  Hz, 1H), 7.07 – 7.02 (m, 2H), 6.73 – 6.63 (m, 2H), 6.61 – 6.55 (m, 2H), 5.15 (dd,  $J = 12.5, 5.1$  Hz, 1H), 4.92 (d,  $J = 15.6$  Hz, 1H), 4.81 (d,  $J = 15.6$  Hz, 1H), 4.08 (s, 1H), 3.54 (s, 3H), 2.68 (t,  $J = 13.1$  Hz, 1H), 2.18 (dd,  $J = 13.7, 5.2$  Hz, 1H);  $^{13}\text{C}$  NMR (100 MHz,  $\text{CDCl}_3$ )  $\delta$  (ppm): 178.8, 152.5, 143.4, 136.7, 136.0, 135.4, 130.9, 129.0, 127.9, 127.4, 126.6, 125.9, 125.3, 125.0, 122.8, 122.7, 122.0, 119.9, 119.3, 117.7, 114.9, 114.6, 113.2, 112.5, 111.3, 59.9, 55.7, 43.7, 38.9, 30.6; IR (KBr): 3651, 3525, 3441, 3274, 2923, 1705, 1629, 1490, 1353, 1235, 1173, 1095, 1013.99 1037, 987, 801, 743, 567  $\text{cm}^{-1}$ ;

ESI FTMS exact mass calcd for  $(C_{32}H_{26}ClN_3O_2-H)^-$  requires  $m/z$  518.1630, found  $m/z$  518.1631; Enantiomeric ratio: 83:17, determined by HPLC (Daicel Chirapak AD-H, hexane/ isopropanol = 70/ 30, flow rate 1.0 mL/min, T = 30 °C, 254 nm):  $t_R$  = 10.57 min (minor),  $t_R$  = 15.83 min (major).

**(2'R,4'S)-1-(4-chlorobenzyl)-4'-(1H-indol-3-yl)-6'-methoxy-3',4'-dihydro-1'H-spiro[indoline-3,2'-quinolin]-2-one (3ea):** Flash column chromatography eluent, petroleum ether/ethyl acetate = 6/1; Reaction time = 11 h; yield: 50% (26.1 mg); >95:5 dr; yellow sticky oil;  $[\alpha]_D^{20}$  = +226.3 (c 0.31, Acetone);  $^1H$  NMR (400 MHz,  $CDCl_3$ )  $\delta$  (ppm): 8.10 (s, 1H), 7.45 (d,  $J$  = 7.9 Hz, 1H), 7.40 – 7.35 (m, 2H), 7.32 – 7.26 (m, 4H), 7.22 – 7.13 (m, 3H), 7.06 – 7.01 (m, 2H), 6.71 – 6.64 (m, 2H), 6.61 – 6.54 (m, 2H), 5.15 (dd,  $J$  = 12.5, 5.1 Hz, 1H), 4.92 (d,  $J$  = 15.6 Hz, 1H), 4.81 (d,  $J$  = 15.6 Hz, 1H), 4.03 (s, 1H), 3.54 (s, 3H), 2.68 (t,  $J$  = 13.1 Hz, 1H), 2.21 – 2.16 (m, 1H);  $^{13}C$  NMR (100 MHz,  $CDCl_3$ )  $\delta$  (ppm): 179.0, 152.4, 141.8, 136.7, 136.2, 134.5, 133.6, 132.0, 129.3, 129.0, 128.8, 126.6, 125.3, 123.7, 123.2, 122.6, 122.0, 119.9, 119.3, 117.9, 114.7, 114.6, 113.2, 111.2, 109.0, 60.1, 55.8, 43.0, 39.0, 30.7; IR (KBr): 3659, 3525, 3443, 3043, 2360, 1629, 1538, 1353, 568  $cm^{-1}$ ; ESI FTMS exact mass calcd for  $(C_{32}H_{26}ClN_3O-H)^-$  requires  $m/z$  518.1630, found  $m/z$  518.1630; Enantiomeric ratio: 83:17, determined by HPLC (Daicel Chirapak AD-H, hexane/ isopropanol = 70/ 30, flow rate 1.0 mL/min, T = 30 °C, 254 nm):  $t_R$  = 10.73 min (minor),  $t_R$  = 16.07 min (major).

**(2'R,4'S)-1-(4-bromobenzyl)-4'-(1H-indol-3-yl)-6'-methoxy-3',4'-dihydro-1'H-spiro[indoline-3,2'-quinolin]-2-one (3fa):** Flash column chromatography eluent, petroleum ether/ethyl acetate = 6/1; Reaction time = 11 h; yield: 55% (31.2 mg); >95:5 dr; yellow sticky oil;  $[\alpha]_D^{20}$  = +449.5 (c 0.41, Acetone);  $^1H$  NMR (400 MHz,  $CDCl_3$ )  $\delta$  (ppm): 8.11 (s, 1H), 7.45 (d,  $J$  = 8.3 Hz, 3H), 7.37 (t,  $J$  = 8.4 Hz, 2H), 7.24 – 7.12 (m, 5H), 7.07 – 7.00 (m, 2H), 6.72 – 6.62 (m, 2H), 6.61 – 6.53 (m, 2H), 5.15

(dd,  $J = 12.6, 5.1$  Hz, 1H), 4.90 (d,  $J = 15.7$  Hz, 1H), 4.79 (d,  $J = 15.7$  Hz, 1H), 4.06 (s, 1H), 3.54 (s, 3H), 2.68 (t,  $J = 13.1$  Hz, 1H), 2.18 (dd,  $J = 13.7, 5.2$  Hz, 1H);  $^{13}\text{C}$  NMR (100 MHz,  $\text{CDCl}_3$ )  $\delta$  (ppm): 179.0, 152.4, 141.8, 136.7, 136.2, 135.0, 132.0, 129.3, 129.2, 125.3, 123.7, 123.2, 122.6, 122.0, 121.6, 119.9, 119.3, 117.9, 114.7, 114.6, 113.2, 111.3, 109.0, 60.1, 55.8, 43.1, 39.0, 30.7; IR (KBr): 3659, 3525, 3441, 3292, 2923, 1707, 1629, 1488, 1352, 1291, 1235, 1173, 1071, 1097, 1011, 1038, 799, 743,  $580\text{ cm}^{-1}$ ; ESI FTMS exact mass calcd for  $(\text{C}_{32}\text{H}_{26}\text{BrN}_3\text{O}_2\text{-H})^-$  requires  $m/z$  564.1110, found  $m/z$  564.1086; Enantiomeric ratio: 83:17, determined by HPLC (Daicel Chirapak AD-H, hexane/ isopropanol = 70/ 30, flow rate 1.0 mL/min,  $T = 30$  °C, 254 nm):  $t_{\text{R}} = 10.74$  min (minor),  $t_{\text{R}} = 16.07$  min (major).

**(2'R,4'S)-1-(3,4-dichlorobenzyl)-4'-(1H-indol-3-yl)-6'-methoxy-3',4'-dihydro-1'H-spiro[indoline-3,2'-quinolin]-2-one (3ga):** Flash column chromatography eluent, petroleum ether/ethyl acetate = 6/1; Reaction time = 11 h; yield: 51% (28.3 mg); >95:5 dr; yellow sticky oil;  $[\alpha]_{\text{D}}^{20} = +146.0$  (c 0.35, Acetone);  $^1\text{H}$  NMR (400 MHz,  $\text{CDCl}_3$ )  $\delta$  (ppm): 8.11 (s, 1H), 7.47 – 7.42 (m, 2H), 7.41 – 7.34 (m, 3H), 7.22 (td,  $J = 7.8, 1.3$  Hz, 1H), 7.19 – 7.13 (m, 3H), 7.08 – 7.01 (m, 2H), 6.72 – 6.64 (m, 2H), 6.61 – 6.55 (m, 2H), 5.14 (dd,  $J = 12.6, 5.2$  Hz, 1H), 4.89 (d,  $J = 15.8$  Hz, 1H), 4.79 (d,  $J = 15.7$  Hz, 1H), 4.05 (s, 1H), 3.55 (s, 3H), 2.68 (t,  $J = 13.2$  Hz, 1H), 2.23 – 2.16 (m, 1H);  $^{13}\text{C}$  NMR (100 MHz,  $\text{CDCl}_3$ )  $\delta$  (ppm): 179.0, 152.4, 141.5, 136.7, 136.3, 136.1, 133.0, 131.9, 130.9, 129.4, 126.8, 126.6, 125.3, 123.8, 123.4, 122.6, 122.0, 119.9, 119.3, 117.8, 114.8, 114.6, 113.3, 111.3, 108.8, 60.1, 55.8, 42.7, 39.1, 30.7; IR (KBr): 3666, 3525, 3441, 3273, 2923, 2360, 1707, 1629, 1498, 1354, 1236, 1173, 1097, 1031, 988, 872, 806, 742,  $567\text{ cm}^{-1}$ ; ESI FTMS exact mass calcd for  $(\text{C}_{32}\text{H}_{25}\text{Cl}_2\text{N}_3\text{O}_2\text{-H})^-$  requires  $m/z$  552.1240, found  $m/z$  552.1230; Enantiomeric ratio: 81:19, determined by HPLC (Daicel Chirapak IA, hexane/ isopropanol = 70/ 30, flow rate 1.0 mL/min,  $T = 30$  °C, 254 nm):  $t_{\text{R}} = 9.92$  min (minor),  $t_{\text{R}} = 14.61$  min (major).

**(2'R,4'S)-1-benzyl-4'-(1H-indol-3-yl)-6'-methoxy-5-methyl-3',4'-dihydro-1'H-spir**

**o[indoline-3,2'-quinolin]-2-one (3ha):** Flash column chromatography eluent, petroleum ether/ethyl acetate = 6/1; Reaction time = 11 h; yield: 75% (37.5 mg); >95:5 dr; yellow sticky oil;  $[\alpha]_D^{20} = +60.5$  (c 0.56, Acetone);  $^1\text{H NMR}$  (400 MHz,  $\text{CDCl}_3$ )  $\delta$  (ppm): 8.15 (s, 1H), 7.47 (d,  $J = 7.9$  Hz, 1H), 7.34 (dd,  $J = 11.2, 6.3$  Hz, 5H), 7.28 (dd,  $J = 8.4, 4.5$  Hz, 1H), 7.23 – 7.20 (m, 1H), 7.16 (t,  $J = 7.3$  Hz, 1H), 7.11 (d,  $J = 2.3$  Hz, 1H), 7.04 (t,  $J = 7.3$  Hz, 1H), 6.99 (d,  $J = 7.8$  Hz, 1H), 6.67 (dd,  $J = 8.5, 2.7$  Hz, 1H), 6.64 – 6.54 (m, 3H), 5.17 (dd,  $J = 12.5, 5.2$  Hz, 1H), 4.96 (d,  $J = 15.6$  Hz, 1H), 4.84 (d,  $J = 15.6$  Hz, 1H), 3.54 (s, 3H), 2.68 (t,  $J = 13.1$  Hz, 1H), 2.28 (s, 3H), 2.20 (dd,  $J = 13.7, 5.2$  Hz, 1H);  $^{13}\text{C NMR}$  (100 MHz,  $\text{CDCl}_3$ )  $\delta$  (ppm): 179.1, 152.3, 139.6, 136.8, 136.4, 136.1, 132.7, 132.0, 129.5, 128.8, 127.6, 127.4, 126.6, 125.5, 124.4, 122.7, 121.9, 120.0, 119.2, 118.0, 114.7, 113.2, 111.3, 109.0, 60.2, 55.8, 43.7, 39.1, 30.8, 21.0; IR (KBr): 3553, 3482, 3416, 3234, 2920, 1701, 1617, 1637, 1497, 1438, 1455, 1383, 1342, 1265, 1288, 1242, 1149, 1182, 1011, 1038, 988, 809, 742, 697, 620  $\text{cm}^{-1}$ ; ESI FTMS exact mass calcd for  $(\text{C}_{33}\text{H}_{29}\text{N}_3\text{O}_2\text{-H})^-$  requires  $m/z$  498.2176, found  $m/z$  498.2176; Enantiomeric ratio: 72:28, determined by HPLC (Daicel Chirapak OD-H, hexane/ isopropanol = 70/ 30, flow rate 1.0 mL/min, T = 30  $^\circ\text{C}$ , 254 nm):  $t_R = 9.21$  min (minor),  $t_R = 10.37$  min (major).

**(2'R,4'S)-1-benzyl-4'-(1H-indol-3-yl)-6'-methoxy-6-methyl-3',4'-dihydro-1'H-spiro[indoline-3,2'-quinolin]-2-one (3ia):** Flash column chromatography eluent, petroleum ether/ethyl acetate = 6/1; Reaction time = 11 h; yield: 65% (32.7 mg); >95:5 dr; yellow sticky oil;  $[\alpha]_D^{20} = +192.6$  (c 0.39, Acetone);  $^1\text{H NMR}$  (400 MHz,  $\text{CDCl}_3$ )  $\delta$  (ppm): 8.08 (s, 1H), 7.46 (d,  $J = 7.9$  Hz, 1H), 7.38 – 7.32 (m, 5H), 7.29 – 7.27 (m, 1H), 7.25 – 7.23 (m, 1H), 7.19 – 7.13 (m, 3H), 7.05 – 7.01 (m, 1H), 6.84 (d,  $J = 7.5$  Hz, 1H), 6.65 (dd,  $J = 8.4, 2.7$  Hz, 1H), 6.57 – 6.54 (m, 2H), 5.16 (dd,  $J = 12.5, 5.1$  Hz, 1H), 4.96 (d,  $J = 15.6$  Hz, 1H), 4.81 (d,  $J = 15.6$  Hz, 1H), 3.54 (s, 3H), 2.67 (t,  $J = 13.1$  Hz, 1H), 2.28 (s, 3H), 2.18 (dd,  $J = 13.7, 5.2$  Hz, 1H);  $^{13}\text{C NMR}$  (100 MHz,  $\text{CDCl}_3$ )  $\delta$  (ppm): 179.3, 152.3, 142.2, 139.6, 136.7, 136.4, 136.1, 129.0, 128.8, 127.6, 127.3, 125.4, 123.5, 123.3, 122.6, 121.9, 120.0, 119.3, 118.1, 114.7, 114.6, 113.2, 111.2, 110.0, 59.9, 55.8, 43.6, 39.0, 30.7, 21.9; IR (KBr): 3347, 3030, 2921, 2851,



1706, 1619, 1497, 1455, 1378, 1341, 1289, 1261, 1239, 1208, 1151, 1096, 1029, 806, 739  $\text{cm}^{-1}$ ; ESI FTMS exact mass calcd for  $(\text{C}_{33}\text{H}_{29}\text{N}_3\text{O}_2\text{-H})^-$  requires  $m/z$  498.2177, found  $m/z$  498.2178; Enantiomeric ratio: 87:13, determined by HPLC (Daicel Chirapak AD-H, hexane/ isopropanol = 70/ 30, flow rate 1.0 mL/min, T = 30 °C, 254 nm):  $t_R$  = 9.52 min (minor),  $t_R$  = 13.64 min (major).

**(2'R,4'S)-1-benzyl-4'-(1H-indol-3-yl)-6'-methoxy-7-methyl-3',4'-dihydro-1'H-spiro[indoline-3,2'-quinolin]-2-one (3ja):** Flash column chromatography eluent, petroleum ether/ethyl acetate = 6/1; Reaction time = 11 h; yield: 51% (25.6 mg); >95:5 dr; yellow sticky oil;  $[\alpha]_D^{20}$  = +193.1 (c 0.38, Acetone);  $^1\text{H}$  NMR (400 MHz,  $\text{CDCl}_3$ )  $\delta$  (ppm): 8.13 (s, 1H), 7.45 (d,  $J$  = 8.0 Hz, 1H), 7.33 (dd,  $J$  = 16.0, 7.9 Hz, 3H), 7.30 – 7.26 (m, 2H), 7.17 (dd,  $J$  = 15.6, 7.3 Hz, 3H), 7.11 (d,  $J$  = 2.2 Hz, 1H), 7.05 – 7.00 (m, 1H), 6.96 (d,  $J$  = 4.9 Hz, 2H), 6.66 (dd,  $J$  = 8.9, 2.5 Hz, 1H), 6.61 – 6.55 (m, 2H), 5.27 (d,  $J$  = 16.8 Hz, 1H), 5.19 – 5.08 (m, 2H), 4.05 (s, 1H), 3.54 (s, 3H), 2.67 (t,  $J$  = 13.1 Hz, 1H), 2.28 (s, 3H), 2.22 (dd,  $J$  = 13.7, 5.2 Hz, 1H);  $^{13}\text{C}$  NMR (100 MHz,  $\text{CDCl}_3$ )  $\delta$  (ppm): 175.3, 175.0, 166.9, 165.9, 144.5, 143.0, 136.5, 136.2, 130.8, 130.4, 130.2, 128.9, 128.7, 128.1, 127.9, 126.5, 125.1, 123.9, 122.9, 122.3, 119.6, 119.5, 111.2, 109.6, 109.0, 107.4, 71.3, 61.9, 61.7, 61.0, 53.6, 44.2, 26.6, 13.8, 13.4; IR (KBr): 3651, 3298, 2924, 2360, 1701, 1600, 1629, 1497, 1353, 1235, 1177, 1094, 1039, 988, 862, 781  $\text{cm}^{-1}$ ; ESI FTMS exact mass calcd for  $(\text{C}_{33}\text{H}_{29}\text{N}_3\text{O}_2\text{-H})^-$  requires  $m/z$  498.2176, found  $m/z$  498.2189; Enantiomeric ratio: 87:13, determined by HPLC (Daicel Chirapak AD-H, hexane/ isopropanol = 70/ 30, flow rate 1.0 mL/min, T = 30 °C, 254 nm):  $t_R$  = 9.11 min (minor),  $t_R$  = 14.23 min (major).

**(2'R,4'S)-1-benzyl-4'-(1H-indol-3-yl)-6,6'-dimethoxy-3',4'-dihydro-1'H-spiro[indoline-3,2'-quinolin]-2-one (3ka):** Flash column chromatography eluent, petroleum ether/ethyl acetate = 6/1; Reaction time = 11 h; yield: 67% (34.8 mg); >95:5 dr; yellow sticky oil;  $[\alpha]_D^{20}$  = +232.7 (c 0.45, Acetone);  $^1\text{H}$  NMR (400 MHz,  $\text{CDCl}_3$ )  $\delta$  (ppm): 8.13 (s, 1H), 7.46 (d,  $J$  = 7.9 Hz, 1H), 7.37 – 7.31 (m, 5H), 7.31 – 7.26 (m, 2H), 7.18 – 7.14 (m, 1H), 7.11 (d,  $J$  = 2.3 Hz, 1H), 7.06 – 7.01 (m, 1H), 6.66 (dd,  $J$  =

8.3, 2.6 Hz, 1H), 6.59 – 6.54 (m, 2H), 6.52 (dd,  $J = 8.3, 2.2$  Hz, 1H), 6.32 (d,  $J = 2.2$  Hz, 1H), 5.17 (dd,  $J = 12.5, 5.1$  Hz, 1H), 4.93 (d,  $J = 15.5$  Hz, 1H), 4.82 (d,  $J = 15.5$  Hz, 1H), 4.01 (s, 1H), 3.73 (s, 3H), 3.54 (s, 3H), 2.66 (t,  $J = 13.1$  Hz, 1H), 2.18 (dd,  $J = 13.7, 5.2$  Hz, 1H);  $^{13}\text{C}$  NMR (100 MHz,  $\text{CDCl}_3$ )  $\delta$  (ppm): 179.5, 160.9, 152.3, 143.4, 136.7, 136.4, 135.9, 128.9, 127.7, 127.4, 125.4, 124.3, 123.9, 122.7, 121.9, 120.0, 119.2, 118.0, 114.7, 113.2, 111.3, 106.4, 97.4, 59.7, 55.8, 55.5, 43.7, 39.1, 30.8; IR (KBr): 3356, 2923, 2834, 1706, 1625, 1501, 1377, 1340, 1264, 1230, 1201, 1159, 1102, 1032, 985, 907, 804, 740, 698  $\text{cm}^{-1}$ ; ESI FTMS exact mass calcd for  $(\text{C}_{33}\text{H}_{29}\text{N}_3\text{O}_3\text{-H})^-$  requires  $m/z$  514.2126, found  $m/z$  514.2130; Enantiomeric ratio: 89:11, determined by HPLC (Daicel Chirapak AD-H, hexane/ isopropanol = 70/ 30, flow rate 1.0 mL/min,  $T = 30$  °C, 254 nm):  $t_R = 12.58$  min (minor),  $t_R = 18.99$  min (major).

**(2'R,4'S)-1-benzyl-6-bromo-4'-(1H-indol-3-yl)-6'-methoxy-3',4'-dihydro-1'H-spiro[indoline-3,2'-quinolin]-2-one (3la):** Flash column chromatography eluent, petroleum ether/ethyl acetate = 6/1; Reaction time = 11 h; yield: 81% (45.9 mg); 85:15 dr; yellow sticky oil;  $[\alpha]_D^{20} = +171.2$  (c 0.52, Acetone);  $^1\text{H}$  NMR (400 MHz,  $\text{CDCl}_3$ )  $\delta$  (ppm): 8.12 (s, 1H), 7.43 (d,  $J = 7.9$  Hz, 1H), 7.39 – 7.29 (m, 6H), 7.23 (d,  $J = 7.9$  Hz, 1H), 7.20 – 7.14 (m, 2H), 7.12 (d,  $J = 2.3$  Hz, 1H), 7.06 – 7.01 (m, 1H), 6.87 (d,  $J = 1.5$  Hz, 1H), 6.67 (dd,  $J = 8.5, 2.6$  Hz, 1H), 6.57 (d,  $J = 8.7$  Hz, 2H), 5.14 (dd,  $J = 12.5, 5.2$  Hz, 1H), 4.94 (d,  $J = 15.6$  Hz, 1H), 4.79 (d,  $J = 15.6$  Hz, 1H), 3.54 (s, 3H), 2.65 (t,  $J = 13.1$  Hz, 1H), 2.18 (dd,  $J = 13.7, 5.2$  Hz, 1H);  $^{13}\text{C}$  NMR (100 MHz,  $\text{CDCl}_3$ )  $\delta$  179.1, 152.4, 141.8, 136.7, 136.2, 134.5, 133.6, 132.0, 129.3, 129.1, 128.8, 126.6, 125.3, 123.7, 123.2, 122.6, 122.0, 119.9, 119.3, 117.9, 114.7, 114.6, 113.2, 111.3, 109.0, 60.1, 55.8, 43.0, 39.0, 30.7; IR (KBr): 3294, 2923, 2360, 1712, 1603, 1497, 1427, 1369, 1289, 1233, 1173, 1107, 1059, 1037, 985, 867, 810, 742  $\text{cm}^{-1}$ ; ESI FTMS exact mass calcd for  $(\text{C}_{32}\text{H}_{26}\text{BrN}_3\text{O}_2\text{-H})^-$  requires  $m/z$  564.1110, found  $m/z$  564.1102; Enantiomeric ratio: 85:15, determined by HPLC (Daicel Chirapak AD-H, hexane/ isopropanol = 70/ 30, flow rate 1.0 mL/min,  $T = 30$  °C, 254 nm):  $t_R = 9.24$  min (minor),  $t_R = 10.33$  min (major).

**(2'R,4'S)-1-benzyl-7-bromo-4'-(1H-indol-3-yl)-6'-methoxy-3',4'-dihydro-1'H-spiro[indoline-3,2'-quinolin]-2-one (3ma):** Flash column chromatography eluent, petroleum ether/ethyl acetate = 6/1; Reaction time = 11 h; yield: 60% (33.6 mg); >95:5 dr; yellow sticky oil;  $[\alpha]_D^{20} = +200.0$  (c 0.52, Acetone);  $^1\text{H}$  NMR (400 MHz,  $\text{CDCl}_3$ )  $\delta$  (ppm): 8.11 (s, 1H), 7.40 (d,  $J = 7.9$  Hz, 1H), 7.36 (dd,  $J = 8.0, 3.7$  Hz, 3H), 7.31 (d,  $J = 6.1$  Hz, 2H), 7.29 – 7.25 (m, 3H), 7.19 – 7.13 (m, 1H), 7.09 (d,  $J = 2.4$  Hz, 1H), 7.05 – 7.00 (m, 1H), 6.92 (t,  $J = 7.8$  Hz, 1H), 6.67 (dd,  $J = 8.5, 2.5$  Hz, 1H), 6.58 (d,  $J = 8.5$  Hz, 2H), 5.41 (s, 2H), 5.09 (dd,  $J = 12.4, 5.1$  Hz, 1H), 4.04 (s, 1H), 3.54 (s, 3H), 2.63 (t,  $J = 13.1$  Hz, 1H), 2.20 (dd,  $J = 13.7, 5.2$  Hz, 1H);  $^{13}\text{C}$  NMR (100 MHz,  $\text{CDCl}_3$ )  $\delta$  (ppm): 179.7, 152.5, 139.6, 137.6, 136.7, 136.1, 135.4, 135.2, 128.6, 127.2, 126.5, 125.3, 124.3, 122.8, 122.7, 122.0, 119.8, 119.3, 117.6, 114.9, 114.6, 113.3, 111.3, 102.5, 59.6, 55.8, 44.2, 39.5, 30.7; IR (KBr): 3552, 3475, 3415, 3237, 3031, 2924, 1714, 1617, 1637, 1497, 1451, 1341, 1270.63 1289, 1229, 1157, 1113, 1038, 737, 624  $\text{cm}^{-1}$ ; ESI FTMS exact mass calcd for  $(\text{C}_{32}\text{H}_{26}\text{BrN}_3\text{O}_2\text{-H})^-$  requires  $m/z$  564.1110, found  $m/z$  564.1073; Enantiomeric ratio: 85:15, determined by HPLC (Daicel Chirapak AD-H, hexane/ isopropanol = 70/ 30, flow rate 1.0 mL/min, T = 30  $^\circ\text{C}$ , 254 nm):  $t_R = 8.85$  min (minor),  $t_R = 10.90$  min (major).

**(2'R,4'S)-1-benzyl-7-fluoro-4'-(1H-indol-3-yl)-6'-methoxy-3',4'-dihydro-1'H-spiro[indoline-3,2'-quinolin]-2-one (3na):** Flash column chromatography eluent, petroleum ether/ethyl acetate = 6/1; Reaction time = 11 h; yield: 56% (28.1 mg); >95:5 dr; yellow sticky oil;  $[\alpha]_D^{20} = +194.9$  (c 0.30, Acetone);  $^1\text{H}$  NMR (400 MHz,  $\text{CDCl}_3$ )  $\delta$  (ppm): 8.10 (s, 1H), 7.47 – 7.36 (m, 4H), 7.36 – 7.33 (m, 1H), 7.33 – 7.27 (m, 2H), 7.20 – 7.11 (m, 3H), 7.06 – 7.01 (m, 1H), 7.00 – 6.95 (m, 2H), 6.67 (dd,  $J = 8.4, 2.6$  Hz, 1H), 6.62 – 6.53 (m, 2H), 5.13 (dd,  $J = 12.5, 5.2$  Hz, 1H), 5.05 (s, 2H), 4.02 (s, 1H), 3.55 (s, 3H), 2.62 (t,  $J = 13.1$  Hz, 1H), 2.18 (dd,  $J = 8.7, 4.9$  Hz, 1H);  $^{13}\text{C}$  NMR (100 MHz,  $\text{CDCl}_3$ )  $\delta$  (ppm): 178.7, 152.5, 148.5, 146.0, 137.2, 136.7, 136.0, 128.7, 127.7, 125.3, 122.7, 122.0, 119.9, 119.3, 117.8, 117.5, 117.3, 114.8, 114.6, 113.3, 60.3, 55.8, 45.2, 39.2, 30.6; IR (KBr): 3666, 3525, 3440, 3299, 2926, 2360,

1713, 1629, 1497, 1342, 1235, 1178, 1039, 980, 877, 782, 810, 701, 590  $\text{cm}^{-1}$ ; ESI FTMS exact mass calcd for  $(\text{C}_{32}\text{H}_{26}\text{FN}_3\text{O}_2\text{-H})^-$  requires  $m/z$  502.1925, found  $m/z$  502.1925; Enantiomeric ratio: 82:18, determined by HPLC (Daicel Chirapak AD-H, hexane/ isopropanol = 70/ 30, flow rate 1.0 mL/min, T = 30 °C, 254 nm):  $t_R$  = 7.90 min (minor),  $t_R$  = 10.72 min (major).

**(2'R,4'S)-1-benzyl-4'-(1H-indol-3-yl)-6'-methoxy-7-(trifluoromethyl)-3',4'-dihydro-1'H-spiro[indoline-3,2'-quinolin]-2-one (30a):** Flash column chromatography eluent, petroleum ether/ethyl acetate = 6/1; Reaction time = 11 h; yield: 55% (30.4 mg); >95:5 dr; yellow sticky oil;  $[\alpha]_D^{20} = +168.5$  (c 0.44, Acetone);  $^1\text{H}$  NMR (400 MHz,  $\text{CDCl}_3$ )  $\delta$  (ppm): 8.12 (s, 1H), 7.63 (d,  $J = 6.7$  Hz, 1H), 7.57 (d,  $J = 8.1$  Hz, 1H), 7.36 (t,  $J = 8.4$  Hz, 2H), 7.30 (dd,  $J = 7.2, 5.7$  Hz, 2H), 7.23 (d,  $J = 7.4$  Hz, 1H), 7.20 – 7.12 (m, 4H), 7.08 (d,  $J = 2.1$  Hz, 1H), 7.03 (t,  $J = 7.5$  Hz, 1H), 6.67 (dd,  $J = 8.5, 2.9$  Hz, 1H), 6.58 (d,  $J = 8.7$  Hz, 2H), 5.26 (d,  $J = 16.9$  Hz, 1H), 5.15 (d,  $J = 16.9$  Hz, 1H), 5.06 (dd,  $J = 12.5, 5.2$  Hz, 1H), 4.03 (s, 1H), 3.54 (s, 3H), 2.65 (t,  $J = 13.1$  Hz, 1H), 2.21 (dd,  $J = 13.7, 5.3$  Hz, 1H);  $^{13}\text{C}$  NMR (100 MHz,  $\text{CDCl}_3$ )  $\delta$  (ppm): 180.1, 152.6, 140.4, 136.7, 136.6, 136.0, 134.8, 128.5, 127.5, 127.0, 125.8, 125.2, 122.7, 122.6, 122.0, 119.7, 119.3, 117.5, 115.0, 114.6, 113.3, 111.3, 58.4, 55.8, 45.3, 45.3, 39.6, 30.6; IR (KBr): 3651, 3293, 2925, 2361, 1720, 1595, 1498, 1335, 1241, 1180, 1098, 1039, 976, 851, 800, 744, 696  $\text{cm}^{-1}$ ; ESI FTMS exact mass calcd for  $(\text{C}_{33}\text{H}_{26}\text{F}_3\text{N}_3\text{O}_2\text{-H})^-$  requires  $m/z$  552.1893, found  $m/z$  552.1893; Enantiomeric ratio: 82:18, determined by HPLC (Daicel Chirapak AD-H, hexane/ isopropanol = 70/ 30, flow rate 1.0 mL/min, T = 30 °C, 254 nm):  $t_R$  = 5.93 min (minor),  $t_R$  = 7.74 min (major).

**(2'R,4'S)-1-benzyl-6'-ethoxy-4'-(1H-indol-3-yl)-3',4'-dihydro-1'H-spiro[indoline-3,2'-quinolin]-2-one (3pa):** Flash column chromatography eluent, petroleum ether/ethyl acetate = 6/1; Reaction time = 11 h; yield: 50% (24.2 mg); >95:5 dr; yellow sticky oil;  $[\alpha]_D^{20} = +127.4$  (c 0.32, Acetone);  $^1\text{H}$  NMR (400 MHz,  $\text{CDCl}_3$ )  $\delta$  (ppm): 8.09 (s, 1H), 7.46 (d,  $J = 8.0$  Hz, 1H), 7.39 – 7.35 (m, 2H), 7.33 (d,  $J = 4.5$  Hz,

4H), 7.28 (dd,  $J = 8.4, 4.4$  Hz, 1H), 7.21 – 7.14 (m, 3H), 7.06 – 7.00 (m, 2H), 6.72 (d,  $J = 7.8$  Hz, 1H), 6.68 – 6.64 (m, 1H), 6.59 – 6.54 (m, 2H), 5.16 (dd,  $J = 12.5, 5.2$  Hz, 1H), 4.97 (d,  $J = 15.5$  Hz, 1H), 4.84 (d,  $J = 15.5$  Hz, 1H), 4.03 (s, 1H), 3.81 – 3.71 (m, 2H), 2.68 (t,  $J = 13.1$  Hz, 1H), 2.23 – 2.17 (m, 1H), 1.22 (t,  $J = 7.0$  Hz, 3H);  $^{13}\text{C}$  NMR (100 MHz,  $\text{CDCl}_3$ )  $\delta$  (ppm): 179.1, 151.6, 142.1, 136.3, 136.0, 129.2, 128.8, 127.7, 127.4, 125.3, 123.5, 123.0, 122.7, 121.9, 120.0, 119.3, 115.5, 114.7, 114.1, 111.2, 109.2, 64.0, 60.1, 43.6, 39.1, 30.7, 14.9; IR (KBr): 3666, 3524, 3440, 3296, 2922, 2360, 1704, 1628, 1497, 1352, 1264, 1173, 1098, 1046, 973, 808, 742, 697  $\text{cm}^{-1}$ ; ESI FTMS exact mass calcd for  $(\text{C}_{34}\text{H}_{31}\text{N}_3\text{O}_3\text{-H})^-$  requires  $m/z$  498.2176, found  $m/z$  498.2177; Enantiomeric ratio: 82:18, determined by HPLC (Daicel Chirapak AD-H, hexane/ isopropanol = 70/ 30, flow rate 1.0 mL/min,  $T = 30$  °C, 254 nm):  $t_R = 8.95$  min (minor),  $t_R = 13.30$  min (major).

**(2'R,4'S)-1-benzyl-4'-(1H-indol-3-yl)-6'-phenoxy-3',4'-dihydro-1'H-spiro[indoline-3,2'-quinolin]-2-one (3qa):** Flash column chromatography eluent, petroleum ether/ethyl acetate = 6/1; Reaction time = 11 h; yield: 69% (37.6 mg); >95:5 dr; yellow sticky oil;  $[\alpha]_D^{20} = +231.4$  (c 0.43, Acetone);  $^1\text{H}$  NMR (400 MHz,  $\text{CDCl}_3$ )  $\delta$  (ppm): 8.00 (s, 1H), 7.44 – 7.39 (m, 2H), 7.36 – 7.32 (m, 5H), 7.22 – 7.17 (m, 2H), 7.17 – 7.10 (m, 4H), 7.07 – 7.02 (m, 2H), 6.90 – 6.86 (m, 1H), 6.81 – 6.70 (m, 5H), 6.66 – 6.58 (m, 1H), 5.18 (dd,  $J = 12.6, 5.1$  Hz, 1H), 4.97 (d,  $J = 15.6$  Hz, 1H), 4.87 (d,  $J = 15.6$  Hz, 1H), 4.21 (s, 1H), 2.72 (t,  $J = 13.2$  Hz, 1H), 2.20 (dd,  $J = 13.7, 5.2$  Hz, 1H);  $^{13}\text{C}$  NMR (100 MHz,  $\text{CDCl}_3$ )  $\delta$  (ppm): 179.0, 159.1, 147.5, 142.1, 138.9, 136.8, 135.9, 131.7, 129.4, 129.2, 128.9, 127.7, 127.4, 125.3, 123.5, 123.1, 122.0, 121.4, 121.2, 119.5, 119.3, 117.6, 116.6, 114.8, 111.3, 109.3, 60.0, 43.7, 38.7, 30.7; IR (KBr): 3355, 3055, 2962, 2919, 2850, 2361, 1702, 1612, 1486, 1351, 1290, 1261, 1225, 1164, 1096, 1022, 907, 801, 741, 692  $\text{cm}^{-1}$ ; ESI FTMS exact mass calcd for  $(\text{C}_{37}\text{H}_{29}\text{N}_3\text{O}_2\text{-H})^-$  requires  $m/z$  546.2177, found  $m/z$  546.2170; Enantiomeric ratio: 71:29, determined by HPLC (Daicel Chirapak IA, hexane/ isopropanol = 90/ 10, flow rate 1.0 mL/min,  $T = 30$  °C, 254 nm):  $t_R = 38.43$  min (minor),  $t_R = 43.31$  min (major).

**(2'R,4'S)-1-benzyl-4'-(1H-indol-3-yl)-6'-methyl-3',4'-dihydro-1'H-spiro[indoline-3,2'-quinolin]-2-one (3ra):** Flash column chromatography eluent, petroleum ether/ethyl acetate = 6/1; Reaction time = 11 h; yield: 54% (25.6 mg); >95:5 dr; yellow sticky oil;  $[\alpha]_D^{20} = +202.7$  (c 0.18, Acetone);  $^1\text{H}$  NMR (400 MHz,  $\text{CDCl}_3$ )  $\delta$  (ppm): 8.08 (s, 1H), 7.49 (d,  $J = 7.9$  Hz, 1H), 7.41 – 7.36 (m, 2H), 7.32 (d,  $J = 4.5$  Hz, 4H), 7.30 – 7.27 (m, 1H), 7.21 – 7.15 (m, 3H), 7.07 – 7.00 (m, 2H), 6.87 – 6.83 (m, 1H), 6.76 (s, 1H), 6.72 (d,  $J = 7.8$  Hz, 1H), 6.54 (d,  $J = 8.0$  Hz, 1H), 5.17 (dd,  $J = 12.5, 5.0$  Hz, 1H), 4.97 (d,  $J = 15.5$  Hz, 1H), 4.84 (d,  $J = 15.6$  Hz, 1H), 4.10 (s, 1H), 2.68 (t,  $J = 13.1$  Hz, 1H), 2.24 – 2.18 (m, 1H), 2.07 (s, 3H);  $^{13}\text{C}$  NMR (100 MHz,  $\text{CDCl}_3$ )  $\delta$  (ppm): 175.3, 175.0, 166.9, 165.9, 144.5, 143.0, 136.5, 136.2, 130.8, 130.4, 130.2, 128.9, 128.7, 128.1, 127.9, 126.5, 125.1, 123.9, 122.9, 122.3, 119.6, 119.5, 111.2, 109.6, 109.0, 107.4, 71.3, 61.9, 61.7, 61.0, 53.6, 44.2, 26.6, 13.8, 13.4; IR (KBr): 3665, 3525, 3442, 3272, 2922, 2360, 1705, 1629, 1586, 1504, 1351, 1260, 1293, 1175, 1097, 986, 815, 746, 694  $\text{cm}^{-1}$ ; ESI FTMS exact mass calcd for  $(\text{C}_{32}\text{H}_{27}\text{N}_3\text{O}-\text{H})^-$  requires  $m/z$  468.2070, found  $m/z$  468.2084; Enantiomeric ratio: 79:21, determined by HPLC (Daicel Chirapak AD-H, hexane/ isopropanol = 70/ 30, flow rate 1.0 mL/min,  $T = 30$  °C, 254 nm):  $t_R = 8.21$  min (minor),  $t_R = 10.16$  min (major).

**(2'R,4'S)-1-benzyl-4'-(1H-indol-3-yl)-5',6',7'-trimethoxy-3',4'-dihydro-1'H-spiro[indoline-3,2'-quinolin]-2-one (3sa):** Flash column chromatography eluent, petroleum ether/ethyl acetate = 6/1; Reaction time = 11 h; yield: 67% (36.8 mg); >95:5 dr; yellow sticky oil;  $[\alpha]_D^{20} = +132.7$  (c 0.34, Acetone);  $^1\text{H}$  NMR (400 MHz,  $\text{CDCl}_3$ )  $\delta$  (ppm): 7.98 (s, 1H), 7.44 (d,  $J = 7.9$  Hz, 1H), 7.32 (q,  $J = 5.2, 4.2$  Hz, 5H), 7.30 – 7.27 (m, 1H), 7.14 – 7.09 (m, 2H), 7.04 – 6.98 (m, 3H), 6.87 (t,  $J = 7.5$  Hz, 1H), 6.68 (d,  $J = 7.8$  Hz, 1H), 6.03 (s, 1H), 5.00 – 4.90 (m, 2H), 4.83 (d,  $J = 15.5$  Hz, 1H), 4.02 (s, 1H), 3.81 (s, 3H), 3.70 (s, 3H), 3.19 (s, 3H), 2.69 (dd,  $J = 13.9, 9.9$  Hz, 1H), 2.34 (dd,  $J = 13.9, 6.7$  Hz, 1H);  $^{13}\text{C}$  NMR (100 MHz,  $\text{CDCl}_3$ )  $\delta$  (ppm): 152.9, 152.6, 142.1, 139.3, 136.5, 135.9, 135.2, 131.6, 129.1, 128.8, 127.7, 127.4, 126.4, 124.0, 122.8, 121.6, 121.3, 120.7, 119.5, 119.0, 111.1, 110.7, 109.1, 94.2, 60.8, 60.1, 59.7, 55.6,

43.6, 40.5, 28.0; IR (KBr): 3348, 3055, 2928, 1707, 1609, 1486, 1466, 1432, 1395, 1348, 1262, 1237, 1196, 1173, 1110, 1014, 908, 804, 740, 697  $\text{cm}^{-1}$ ; ESI FTMS exact mass calcd for  $(\text{C}_{34}\text{H}_{31}\text{N}_3\text{O}_4\text{-H})^-$  requires  $m/z$  544.2232, found  $m/z$  544.2239; Enantiomeric ratio: 84:16, determined by HPLC (Daicel Chirapak IC, hexane/isopropanol = 70/ 30, flow rate 1.0 mL/min, T = 30 °C, 254 nm):  $t_R$  = 16.36 min (minor),  $t_R$  = 11.80 min (major).

**(2'R,4'S)-1-benzyl-4'-(5-bromo-1H-indol-3-yl)-6'-methoxy-3',4'-dihydro-1'H-spir o[indoline-3,2'-quinolin]-2-one (3ab):** Flash column chromatography eluent, petroleum ether/ethyl acetate = 6/1; Reaction time = 11 h; yield: 57% (32.1 mg); >95:5 dr; yellow sticky oil;  $[\alpha]_D^{20}$  = +138.4 (c 0.51, Acetone);  $^1\text{H}$  NMR (400 MHz,  $\text{CDCl}_3$ )  $\delta$  (ppm): 8.26 (s, 1H), 7.58 (s, 1H), 7.40 (d,  $J$  = 7.4 Hz, 1H), 7.33 (d,  $J$  = 4.3 Hz, 4H), 7.30 – 7.26 (m, 1H), 7.24 – 7.16 (m, 3H), 7.05 (dd,  $J$  = 16.7, 9.1 Hz, 2H), 6.74 (d,  $J$  = 7.8 Hz, 1H), 6.70 – 6.64 (m, 1H), 6.57 (d,  $J$  = 8.6 Hz, 1H), 6.53 – 6.49 (m, 1H), 5.13 (dd,  $J$  = 12.6, 5.2 Hz, 1H), 4.97 (d,  $J$  = 15.5 Hz, 1H), 4.85 (d,  $J$  = 15.5 Hz, 1H), 4.05 (s, 1H), 3.57 (s, 3H), 2.61 (t,  $J$  = 13.1 Hz, 1H), 2.23 – 2.15 (m, 1H);  $^{13}\text{C}$  NMR (100 MHz,  $\text{CDCl}_3$ )  $\delta$  (ppm): 179.0, 152.3, 142.1, 136.3, 135.9, 135.3, 131.8, 129.4, 128.9, 127.7, 127.4, 124.9, 124.0, 123.6, 123.1, 122.2, 117.7, 114.8, 114.6, 113.2, 112.8, 112.6, 109.3, 60.0, 55.8, 43.7, 38.9, 30.5; IR (KBr): 3652, 3310, 2924, 2360, 1704, 1608, 1499, 1348, 1291, 1237, 1175, 1099, 1032, 987, 862, 883, 796, 750, 697  $\text{cm}^{-1}$ ; ESI FTMS exact mass calcd for  $(\text{C}_{32}\text{H}_{26}\text{BrN}_3\text{O}_2\text{-H})^-$  requires  $m/z$  564.1110, found  $m/z$  564.1114; Enantiomeric ratio: 80:20, determined by HPLC (Daicel Chirapak AD-H, hexane/ isopropanol = 70/ 30, flow rate 1.0 mL/min, T = 30 °C, 254 nm):  $t_R$  = 8.12 min (minor),  $t_R$  = 11.01 min (major).

## X-ray single crystal data for compound 3aa

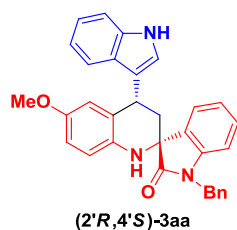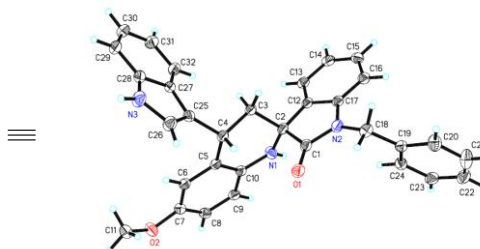

|                                   |                                                               |                   |
|-----------------------------------|---------------------------------------------------------------|-------------------|
| Identification code               | cu_dm14304_0m                                                 |                   |
| Empirical formula                 | C <sub>32</sub> H <sub>27</sub> N <sub>3</sub> O <sub>2</sub> |                   |
| Formula weight                    | 485.56                                                        |                   |
| Temperature                       | 140(2) K                                                      |                   |
| Wavelength                        | 1.54178 Å                                                     |                   |
| Crystal system                    | Monoclinic                                                    |                   |
| Space group                       | C 2                                                           |                   |
| Unit cell dimensions              | a = 17.5165(3) Å                                              | α = 90 °          |
|                                   | b = 5.88650(10) Å                                             | β = 94.9970(10) ° |
|                                   | c = 23.6140(4) Å                                              | γ = 90 °          |
| Volume                            | 2425.61(7) Å <sup>3</sup>                                     |                   |
| Z                                 | 4                                                             |                   |
| Density (calculated)              | 1.330 Mg/m <sup>3</sup>                                       |                   |
| Absorption coefficient            | 0.663 mm <sup>-1</sup>                                        |                   |
| F(000)                            | 1024                                                          |                   |
| Crystal size                      | 0.250 x 0.080 x 0.030 mm <sup>3</sup>                         |                   |
| Theta range for data collection   | 1.878 to 69.992 °                                             |                   |
| Index ranges                      | -21 ≤ h ≤ 17, -5 ≤ k ≤ 6, -28 ≤ l ≤ 28                        |                   |
| Reflections collected             | 5722                                                          |                   |
| Independent reflections           | 3102 [R(int) = 0.0332]                                        |                   |
| Completeness to theta = 67.679 °  | 96.9 %                                                        |                   |
| Absorption correction             | Semi-empirical from equivalents                               |                   |
| Max. and min. transmission        | 0.7532 and 0.4726                                             |                   |
| Refinement method                 | Full-matrix least-squares on F <sup>2</sup>                   |                   |
| Data / restraints / parameters    | 3102 / 1 / 335                                                |                   |
| Goodness-of-fit on F <sup>2</sup> | 1.105                                                         |                   |
| Final R indices [I > 2σ(I)]       | R1 = 0.0441, wR2 = 0.1239                                     |                   |
| R indices (all data)              | R1 = 0.0487, wR2 = 0.1322                                     |                   |
| Absolute structure parameter      | 0.2(3)                                                        |                   |
| Extinction coefficient            | n/a                                                           |                   |
| Largest diff. peak and hole       | 0.310 and -0.348 e.Å <sup>-3</sup>                            |                   |



## NMR Spectra of products 3

### 3aa

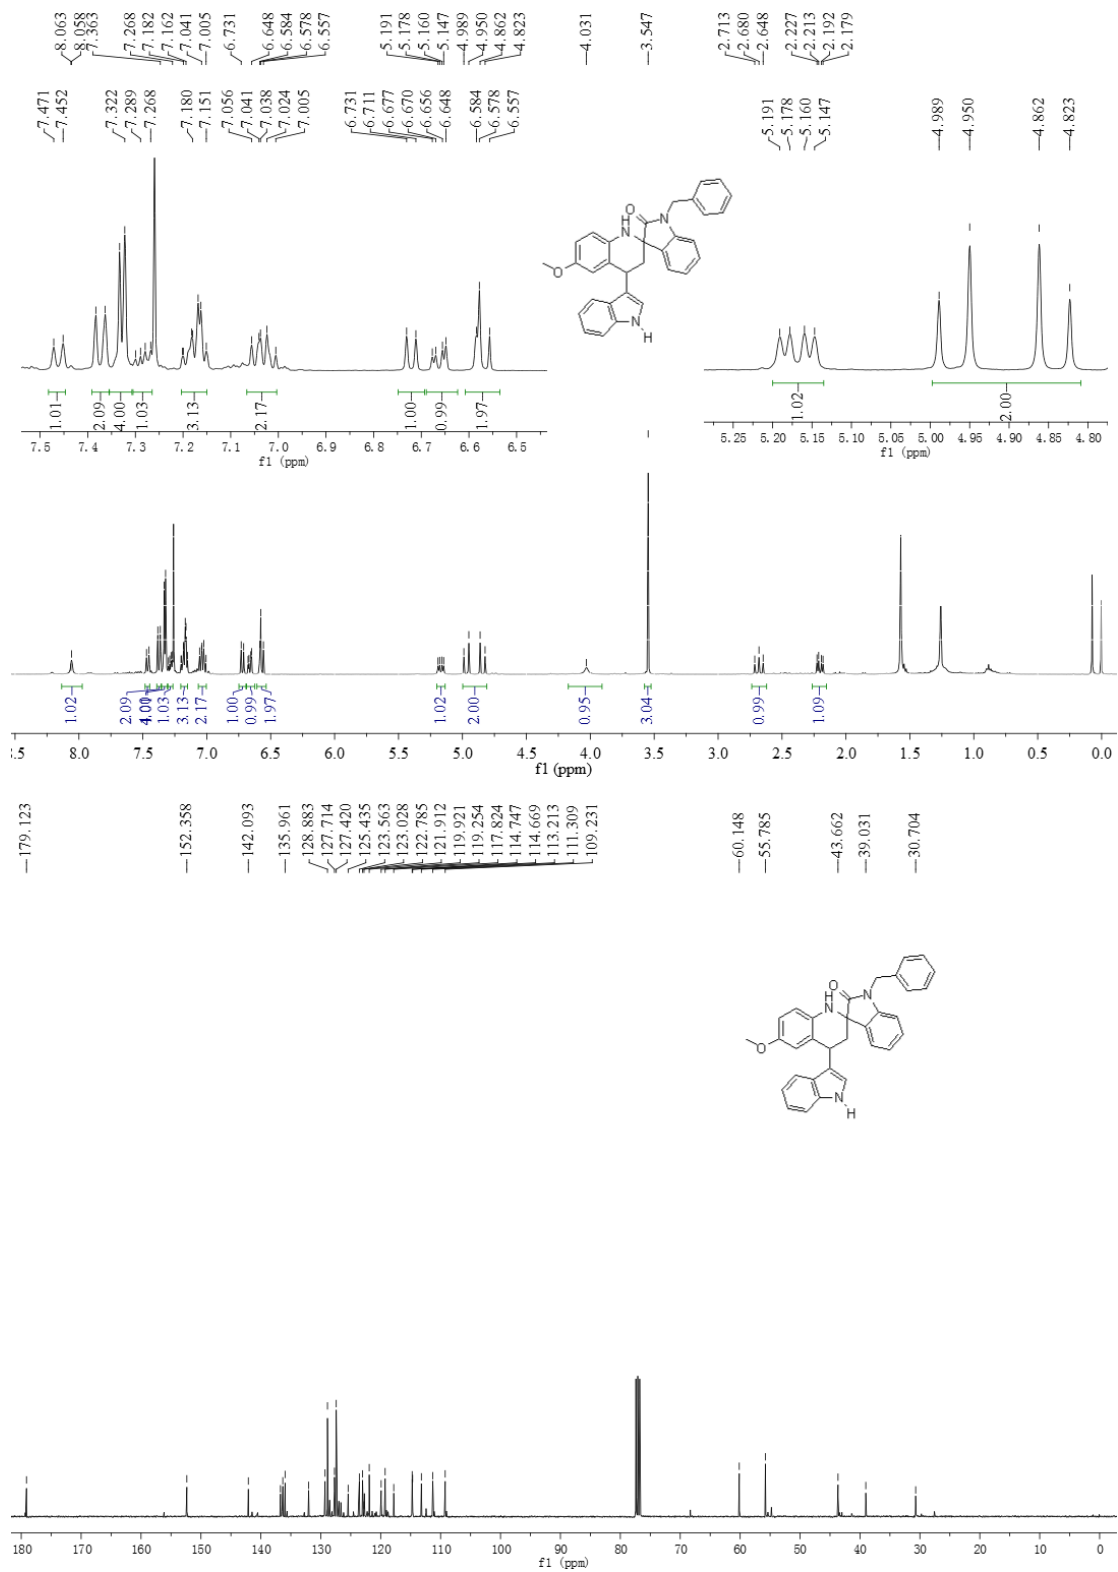

**3ba**

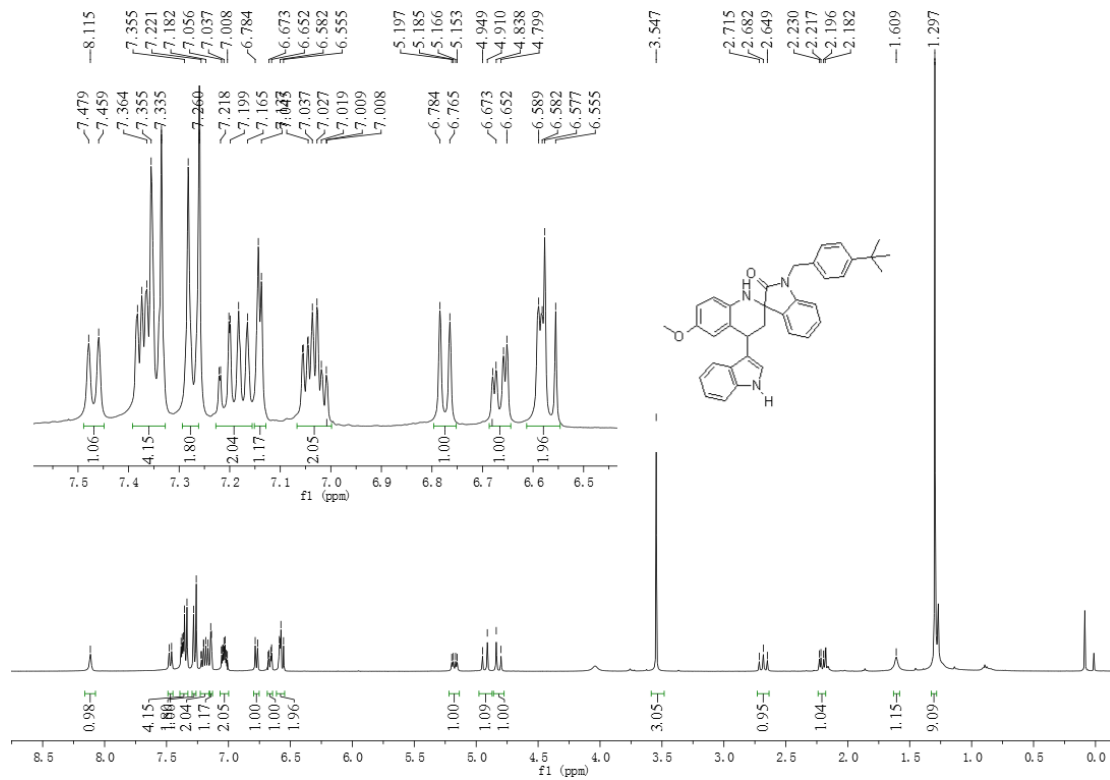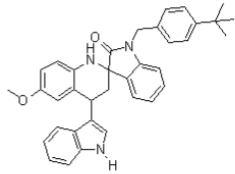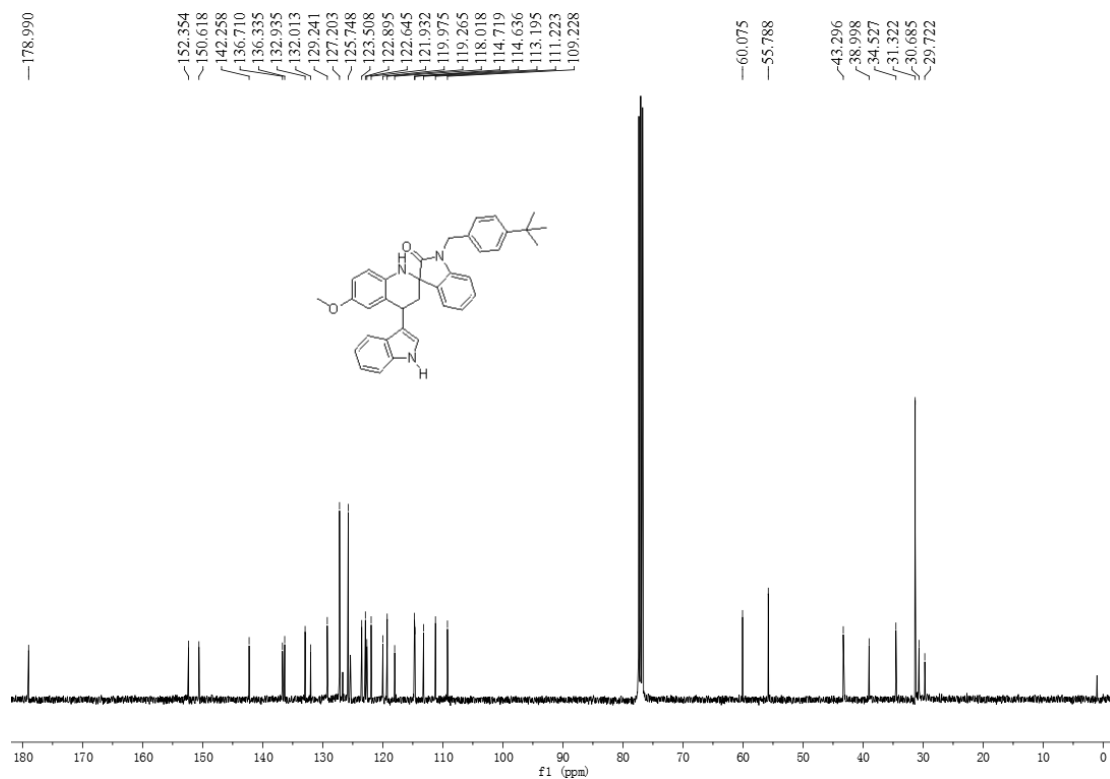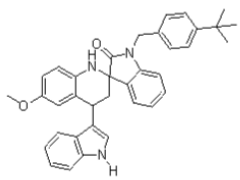

**3ca**

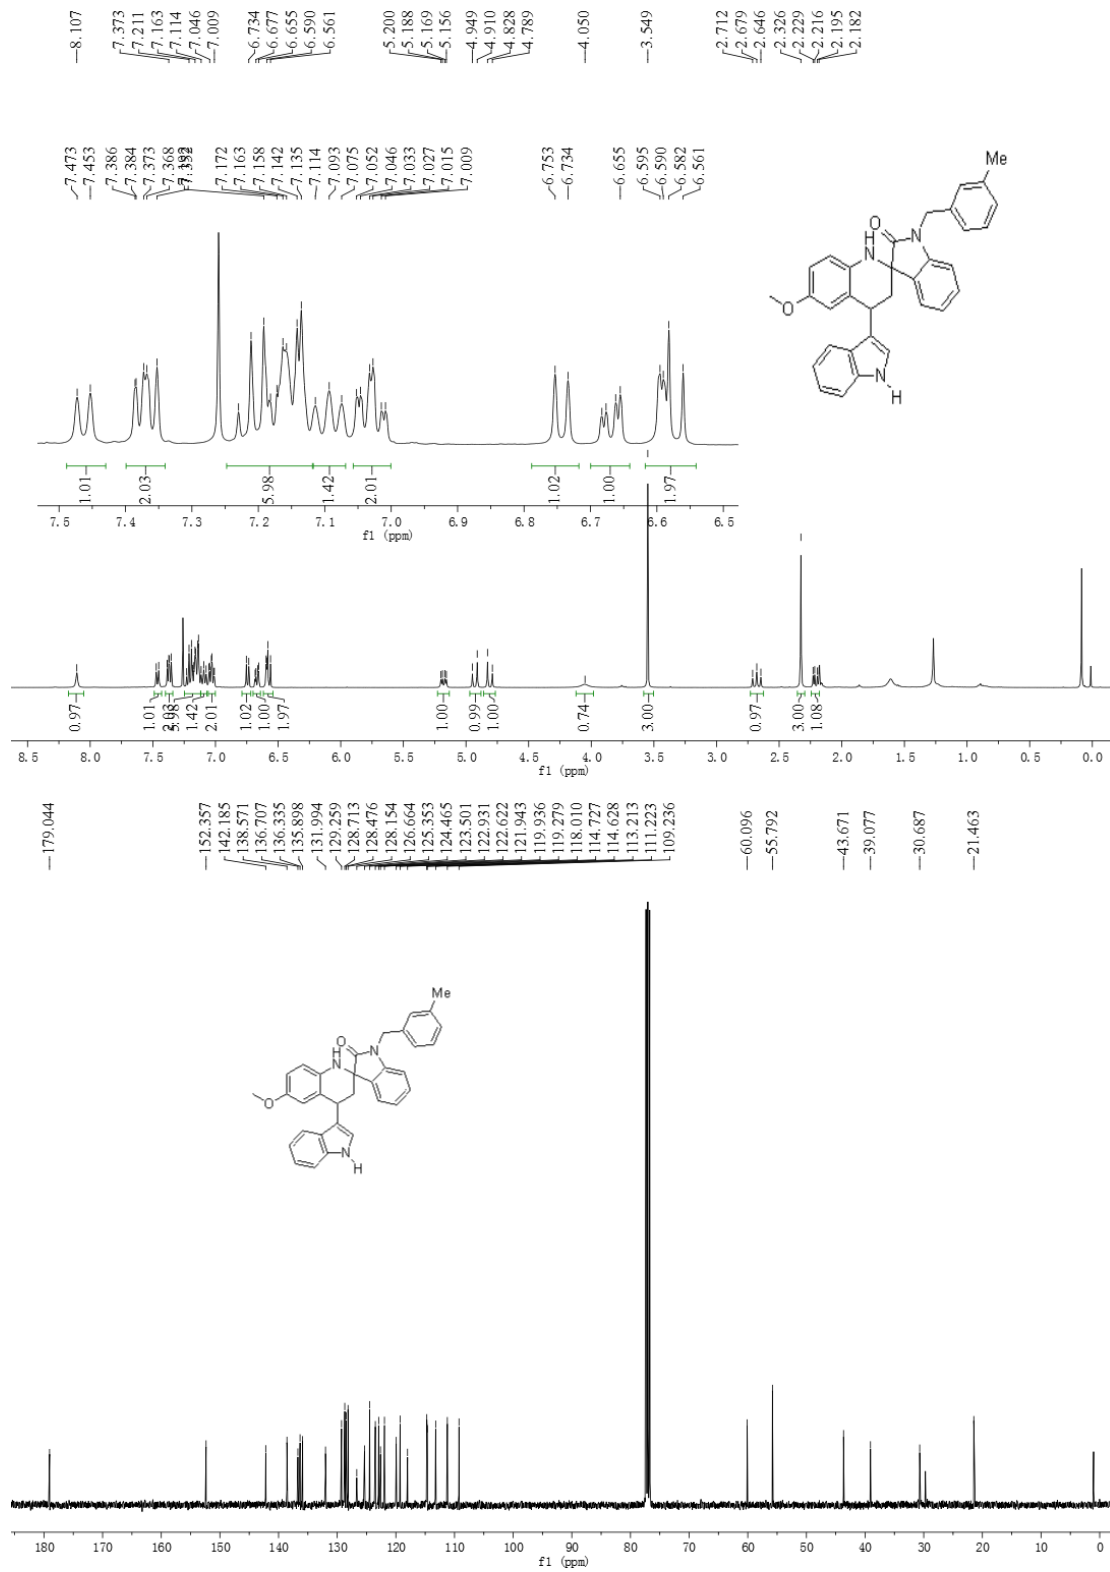

3da

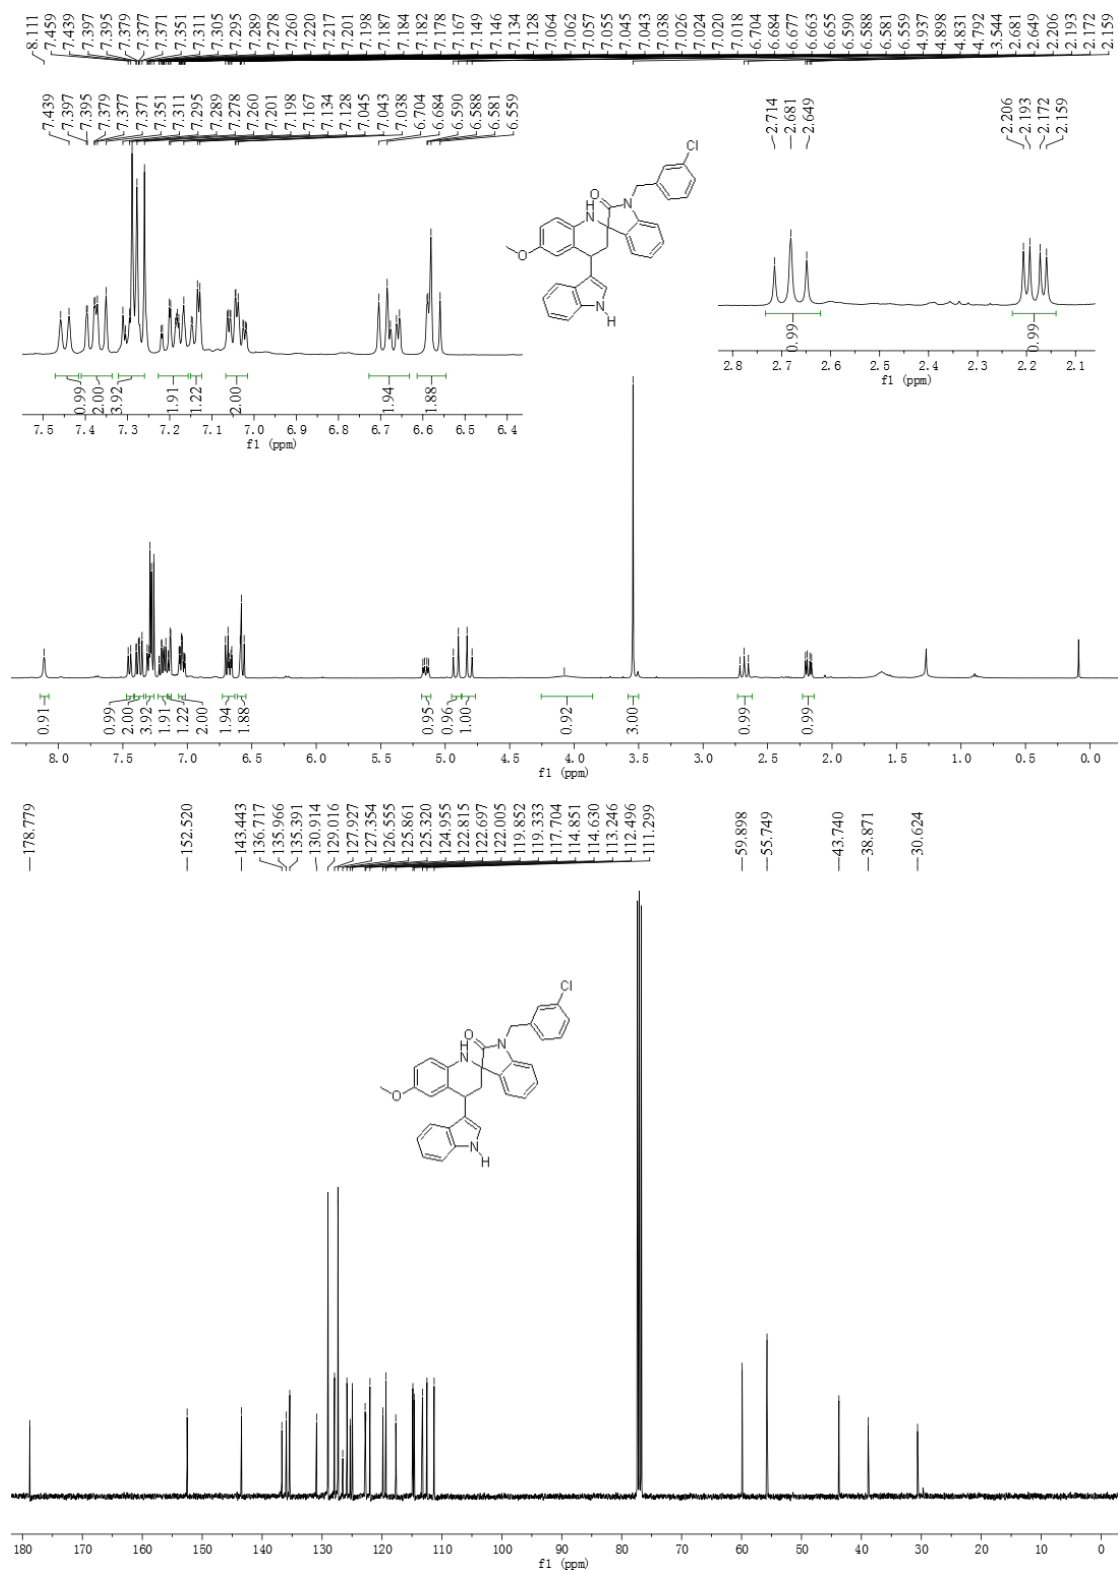

3ea

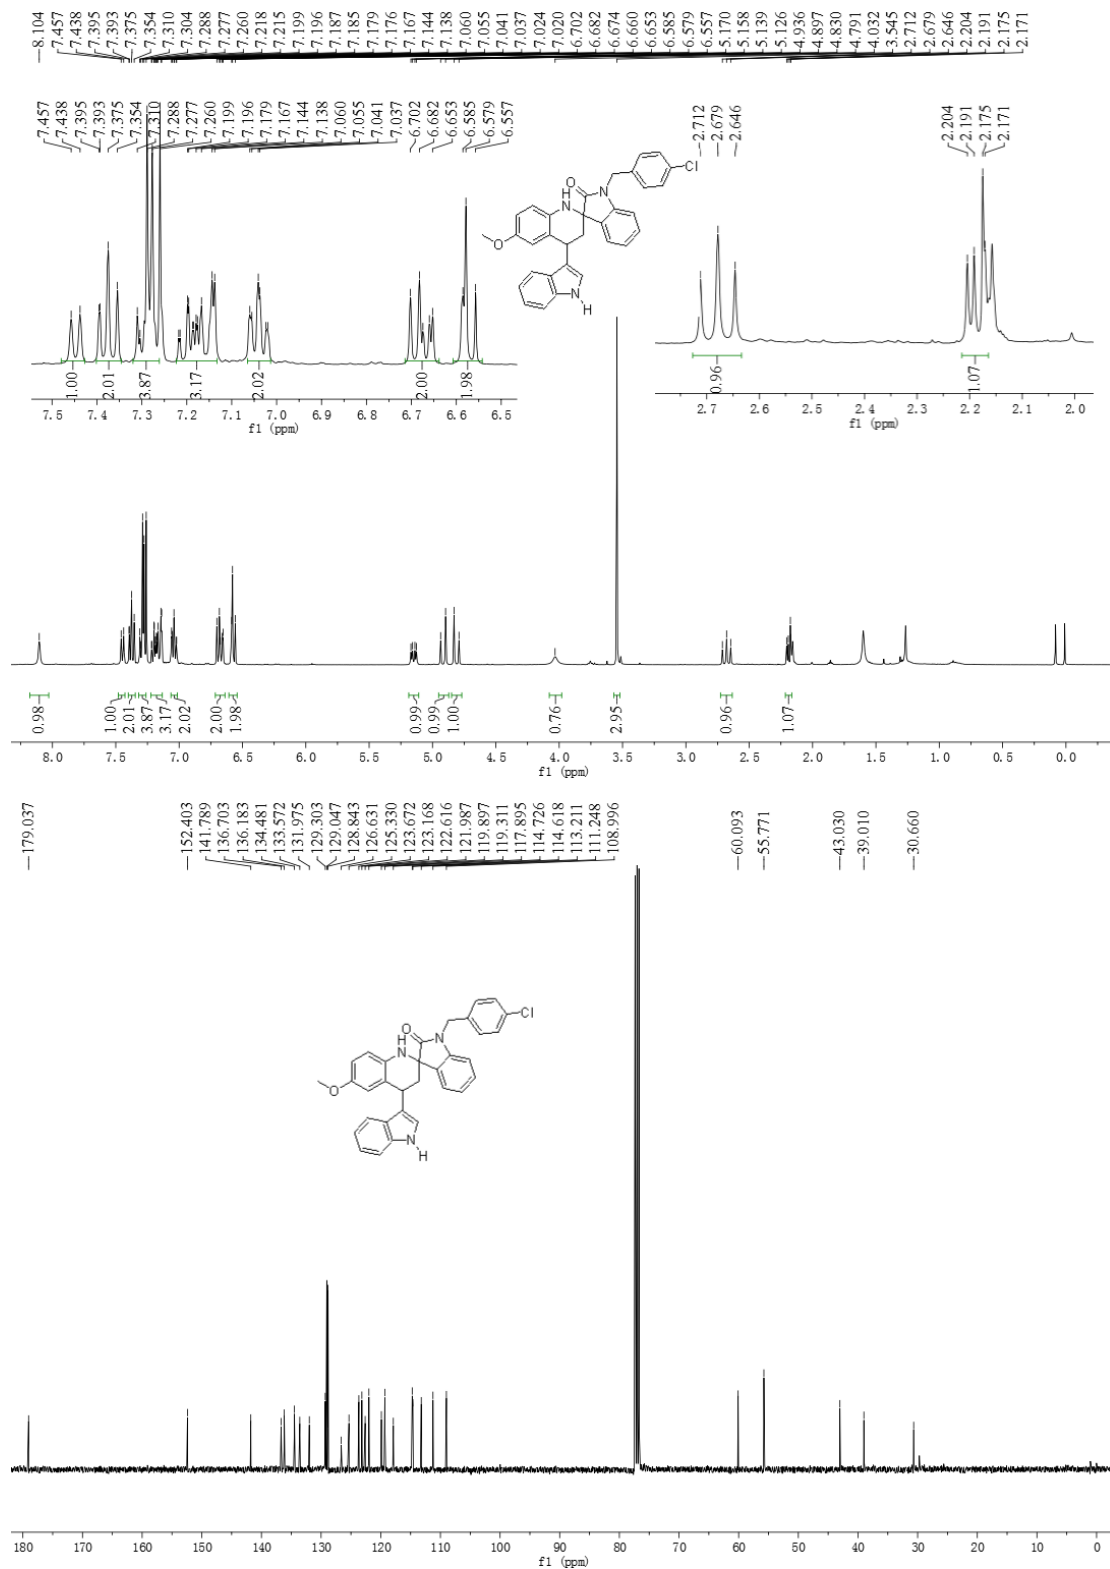

**3fa**

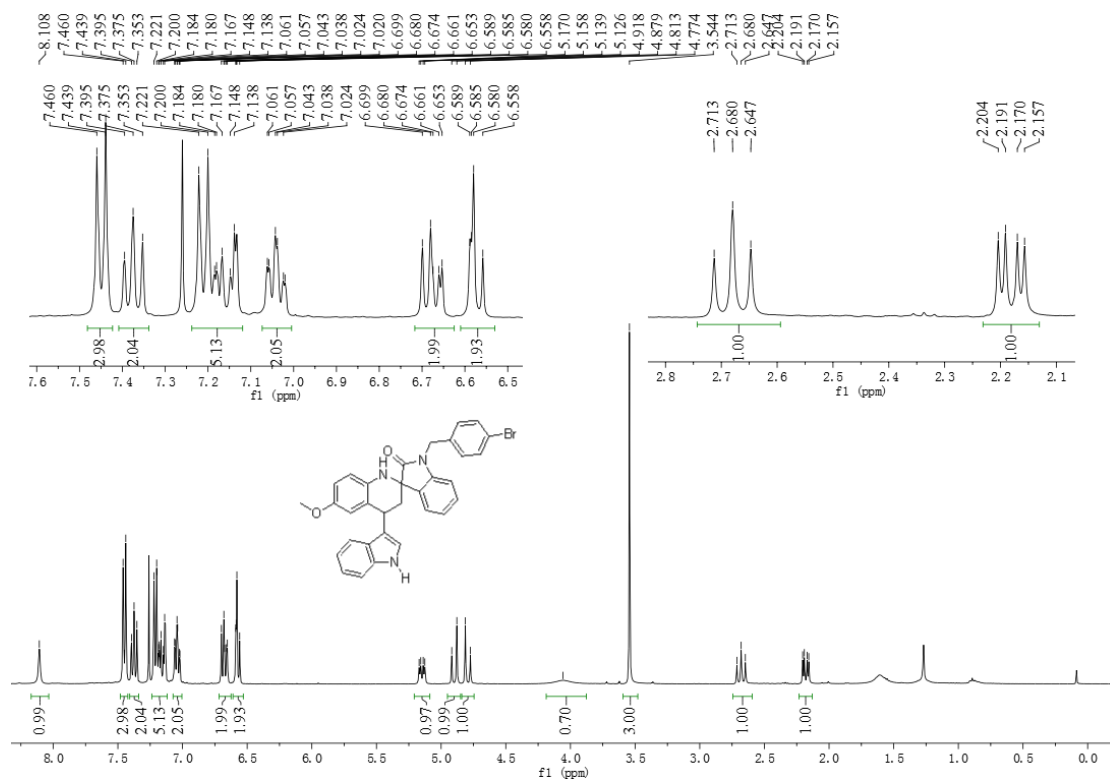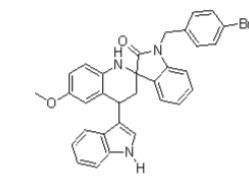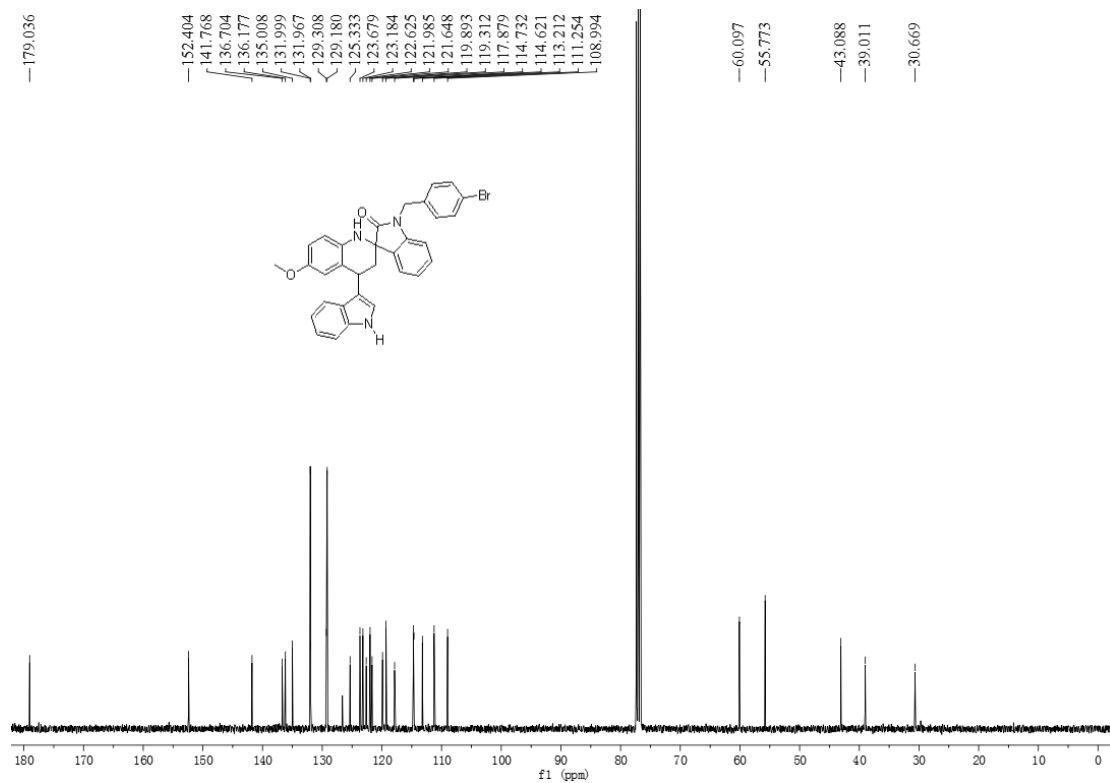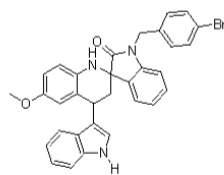

**3ga**

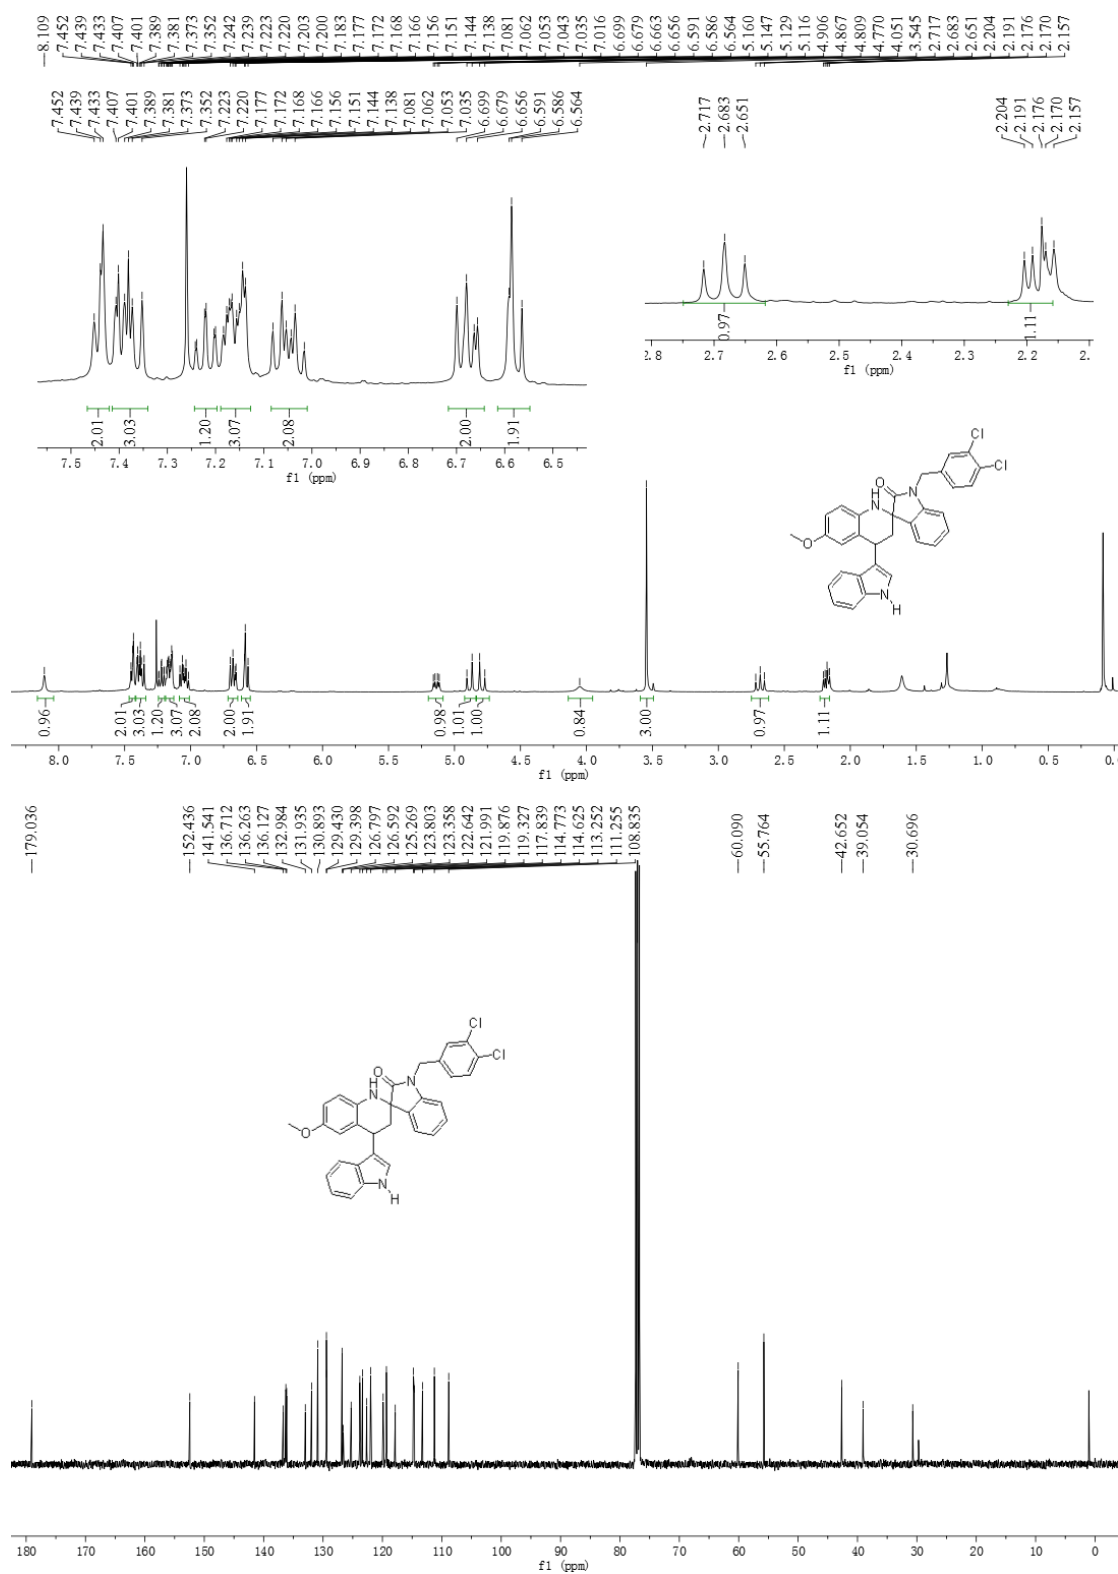

3ha

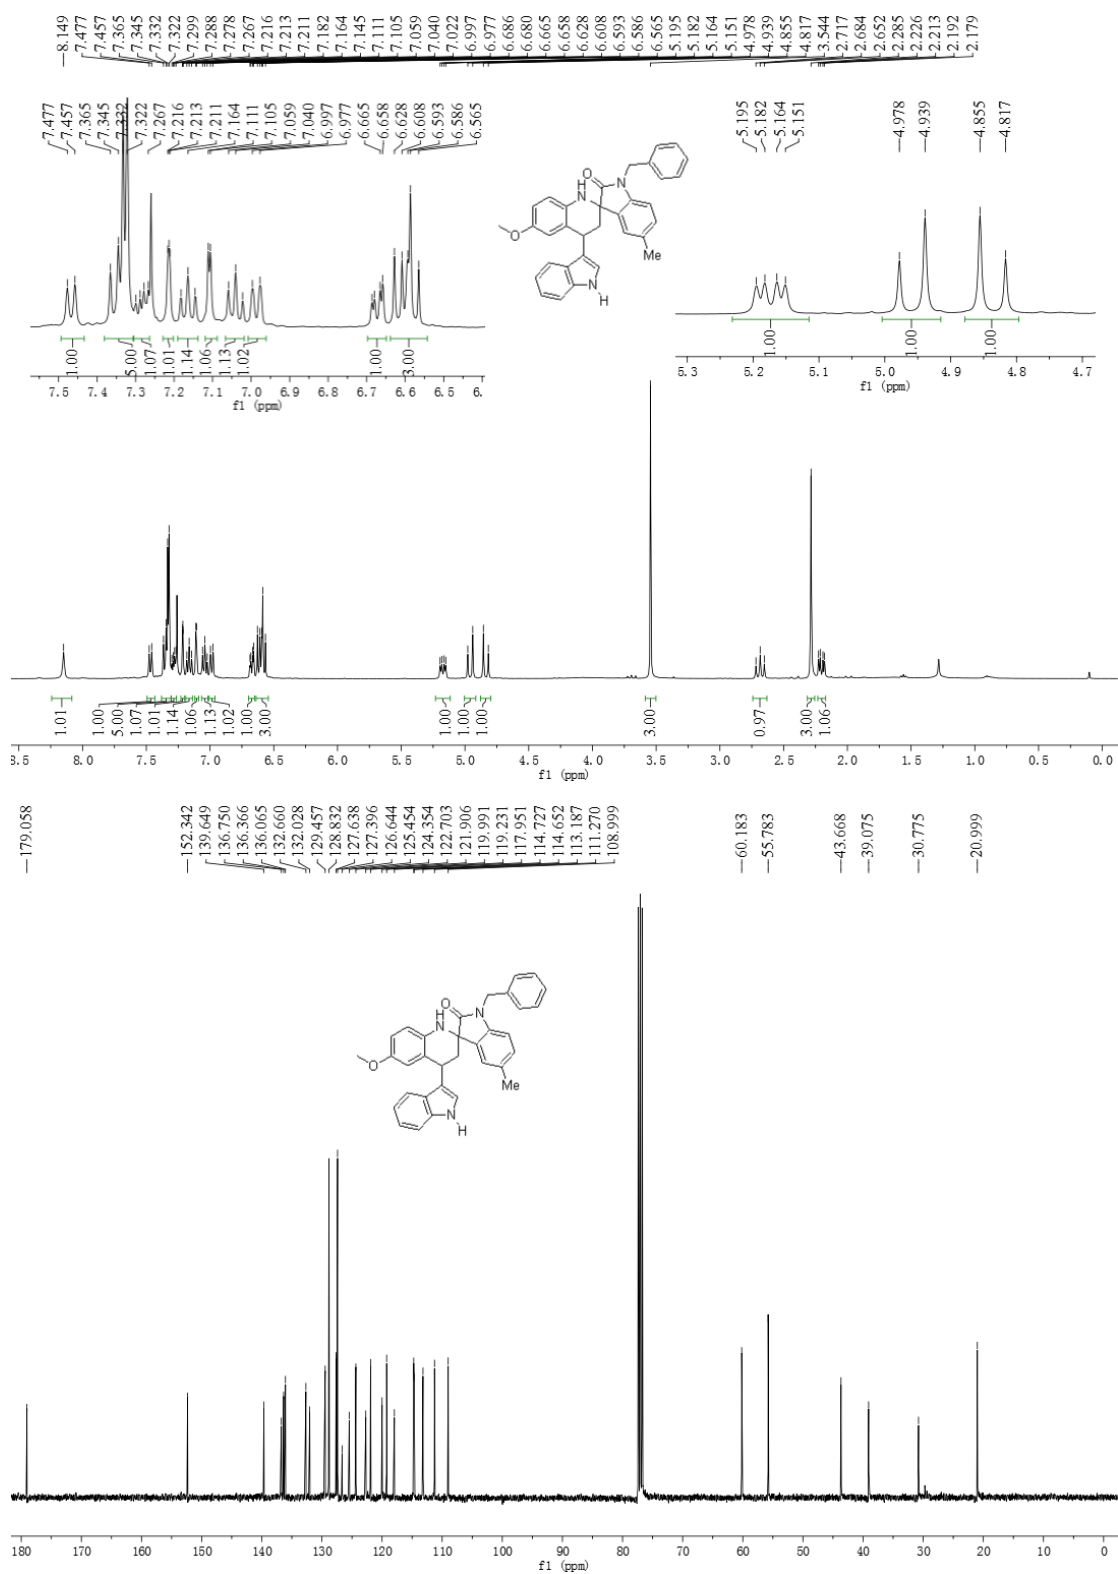



**3ia**

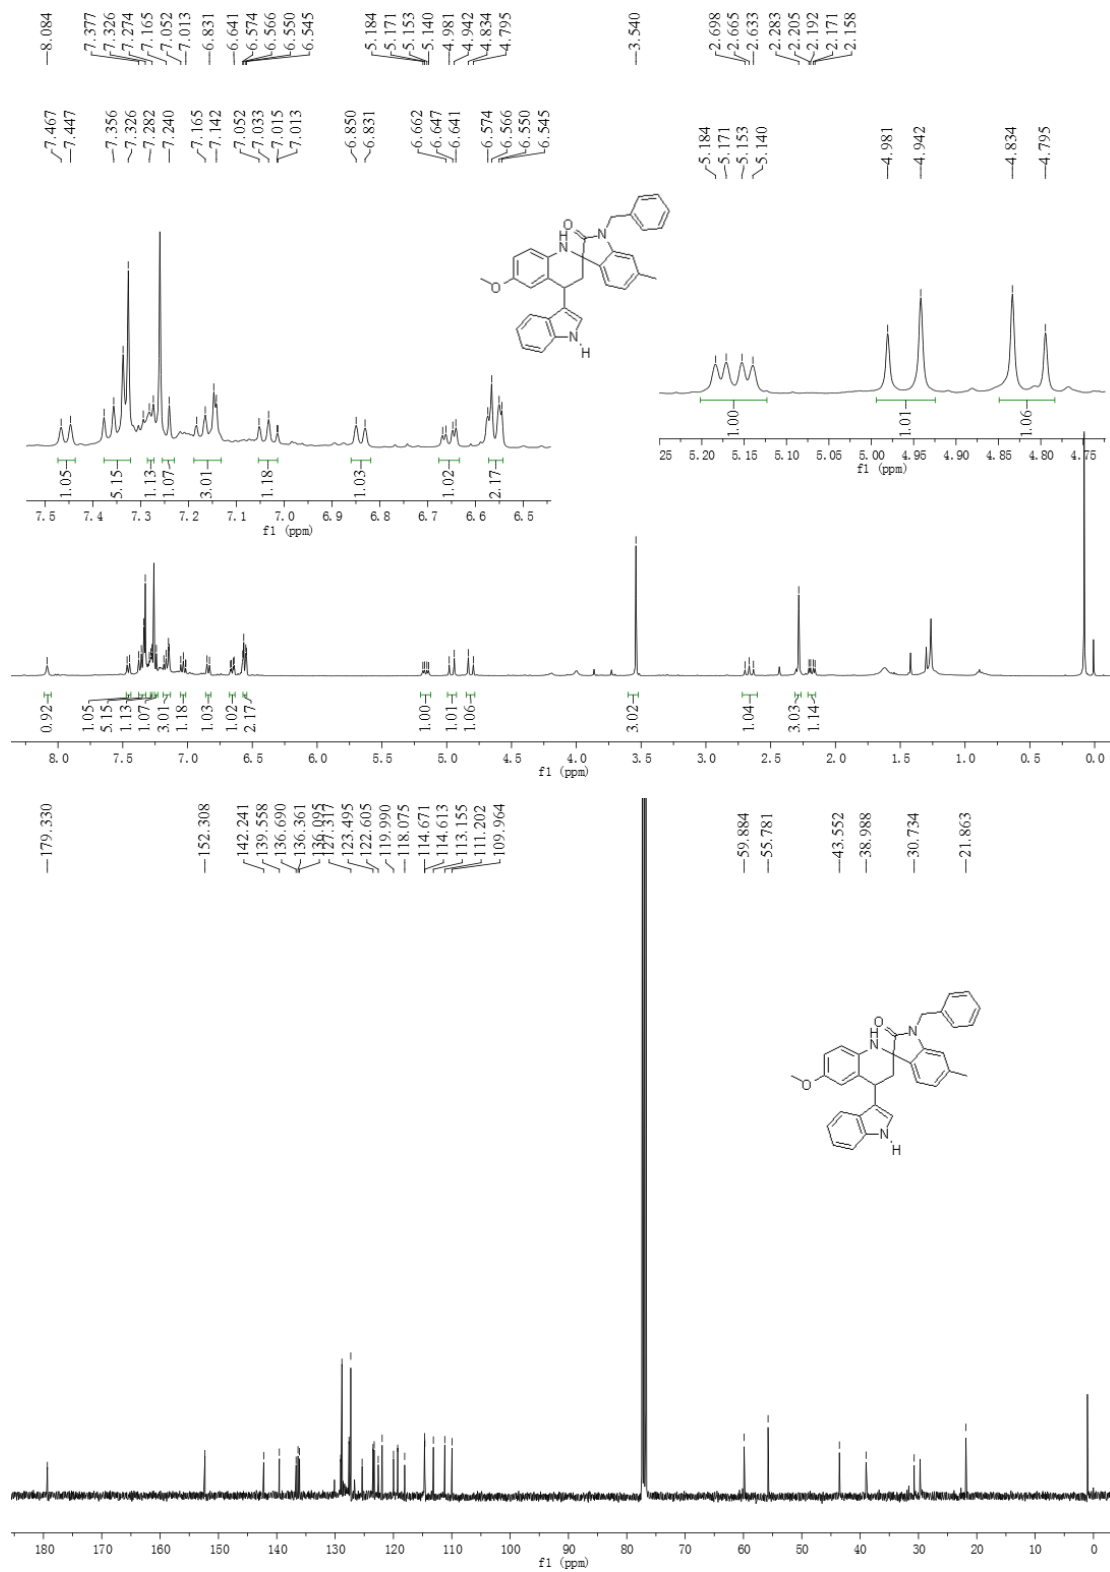

3ja

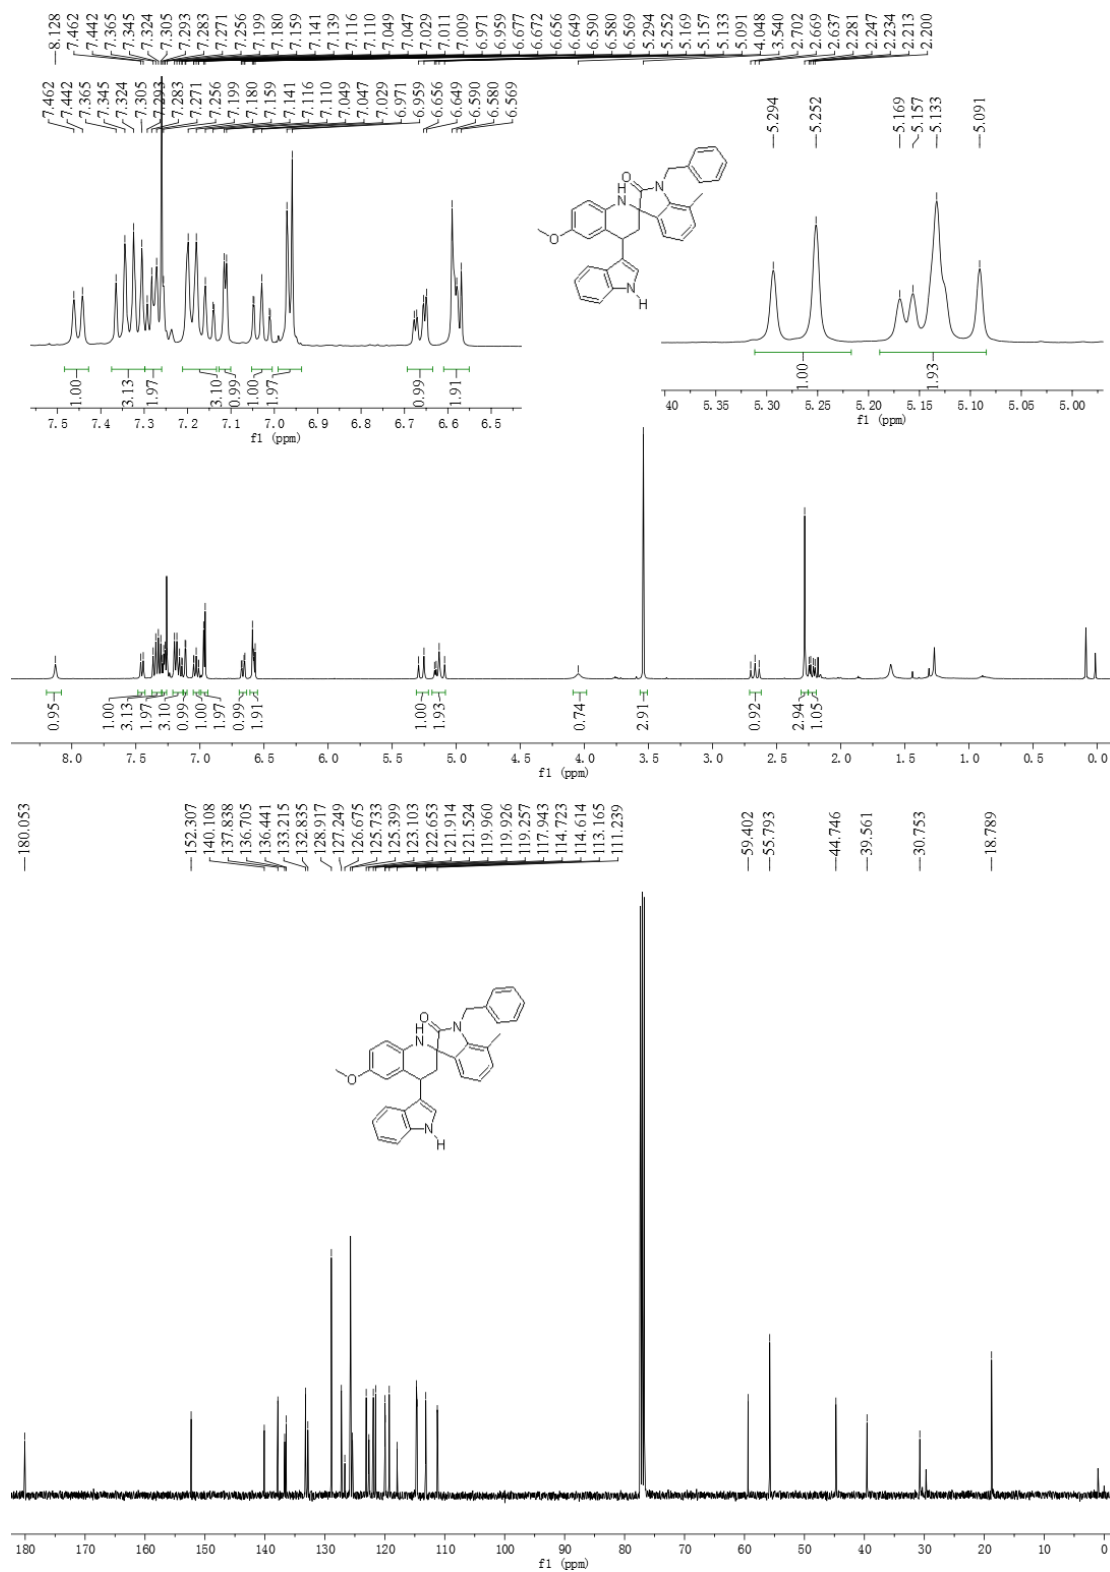

**3ka**

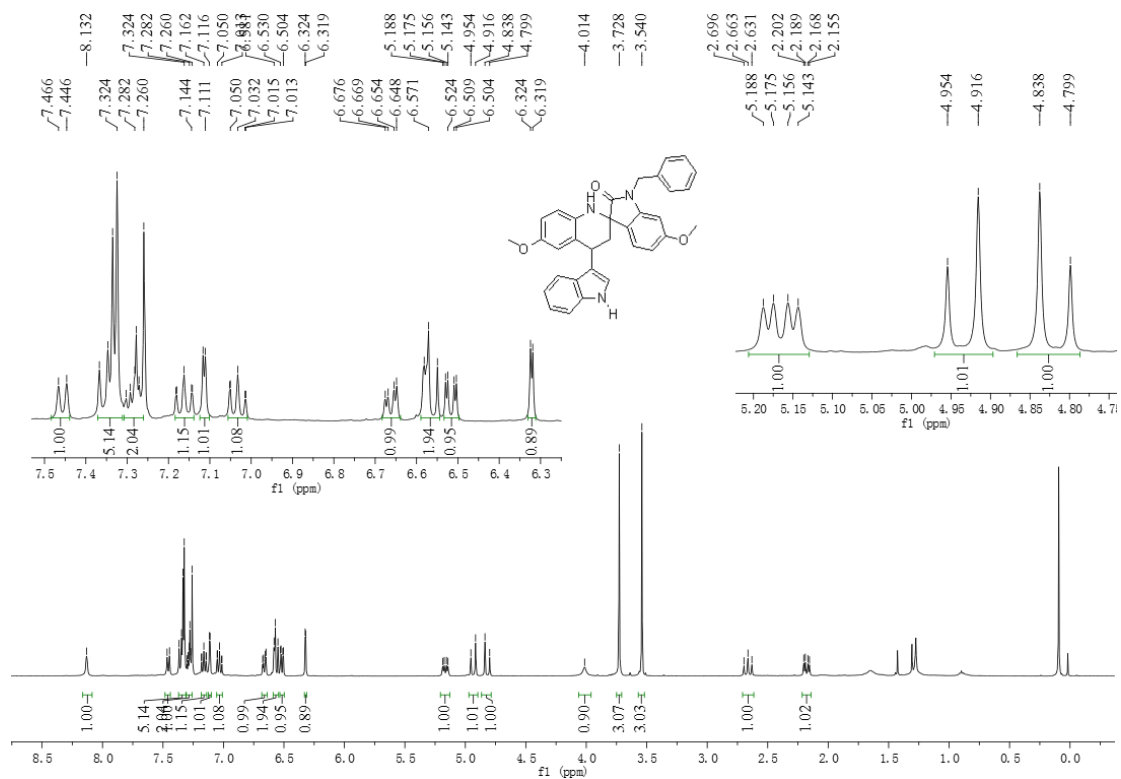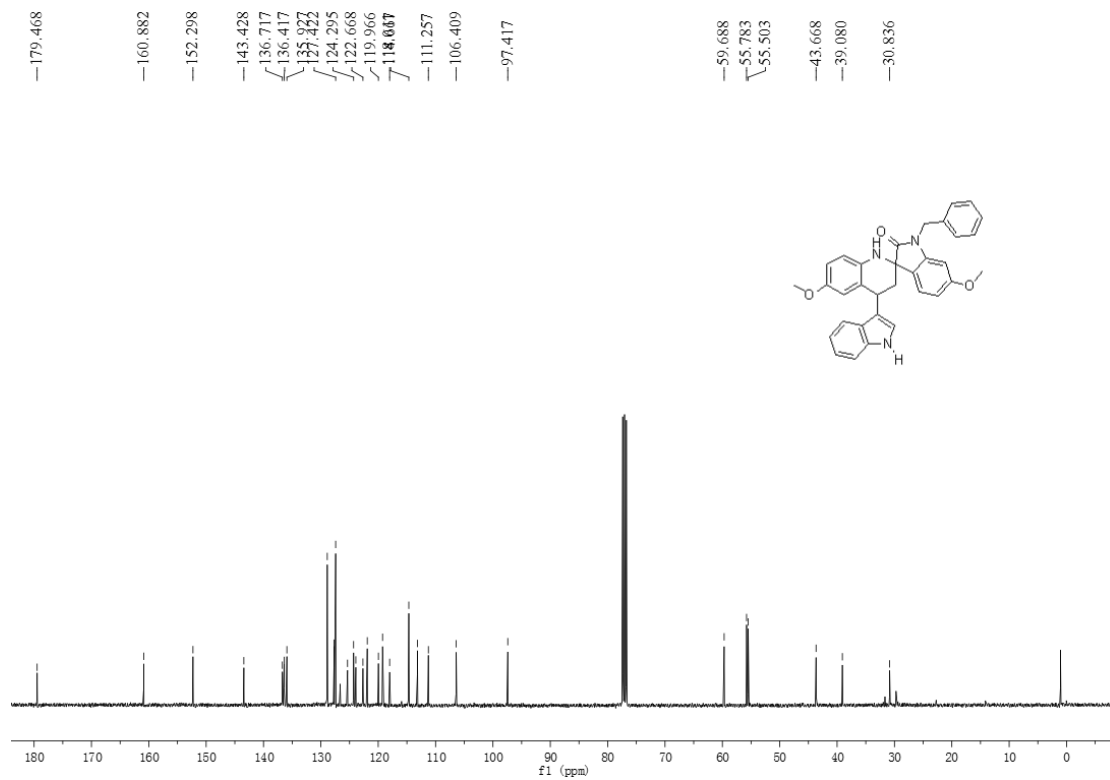

3la

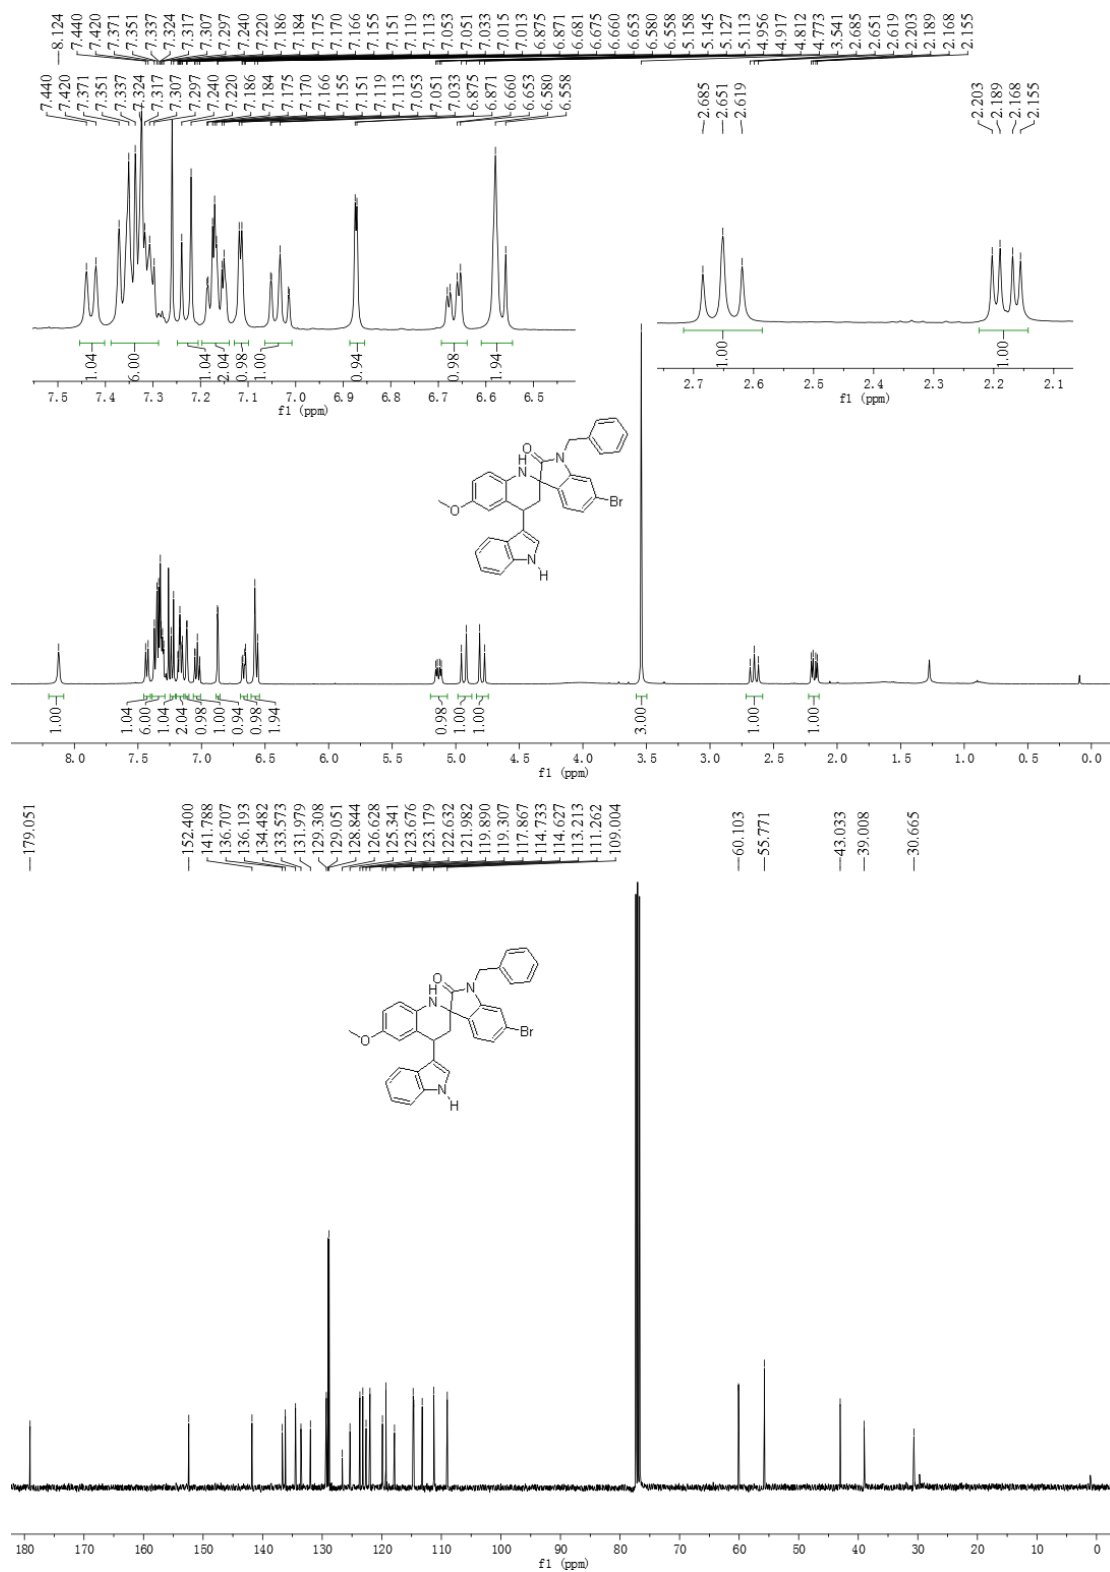

### 3ma

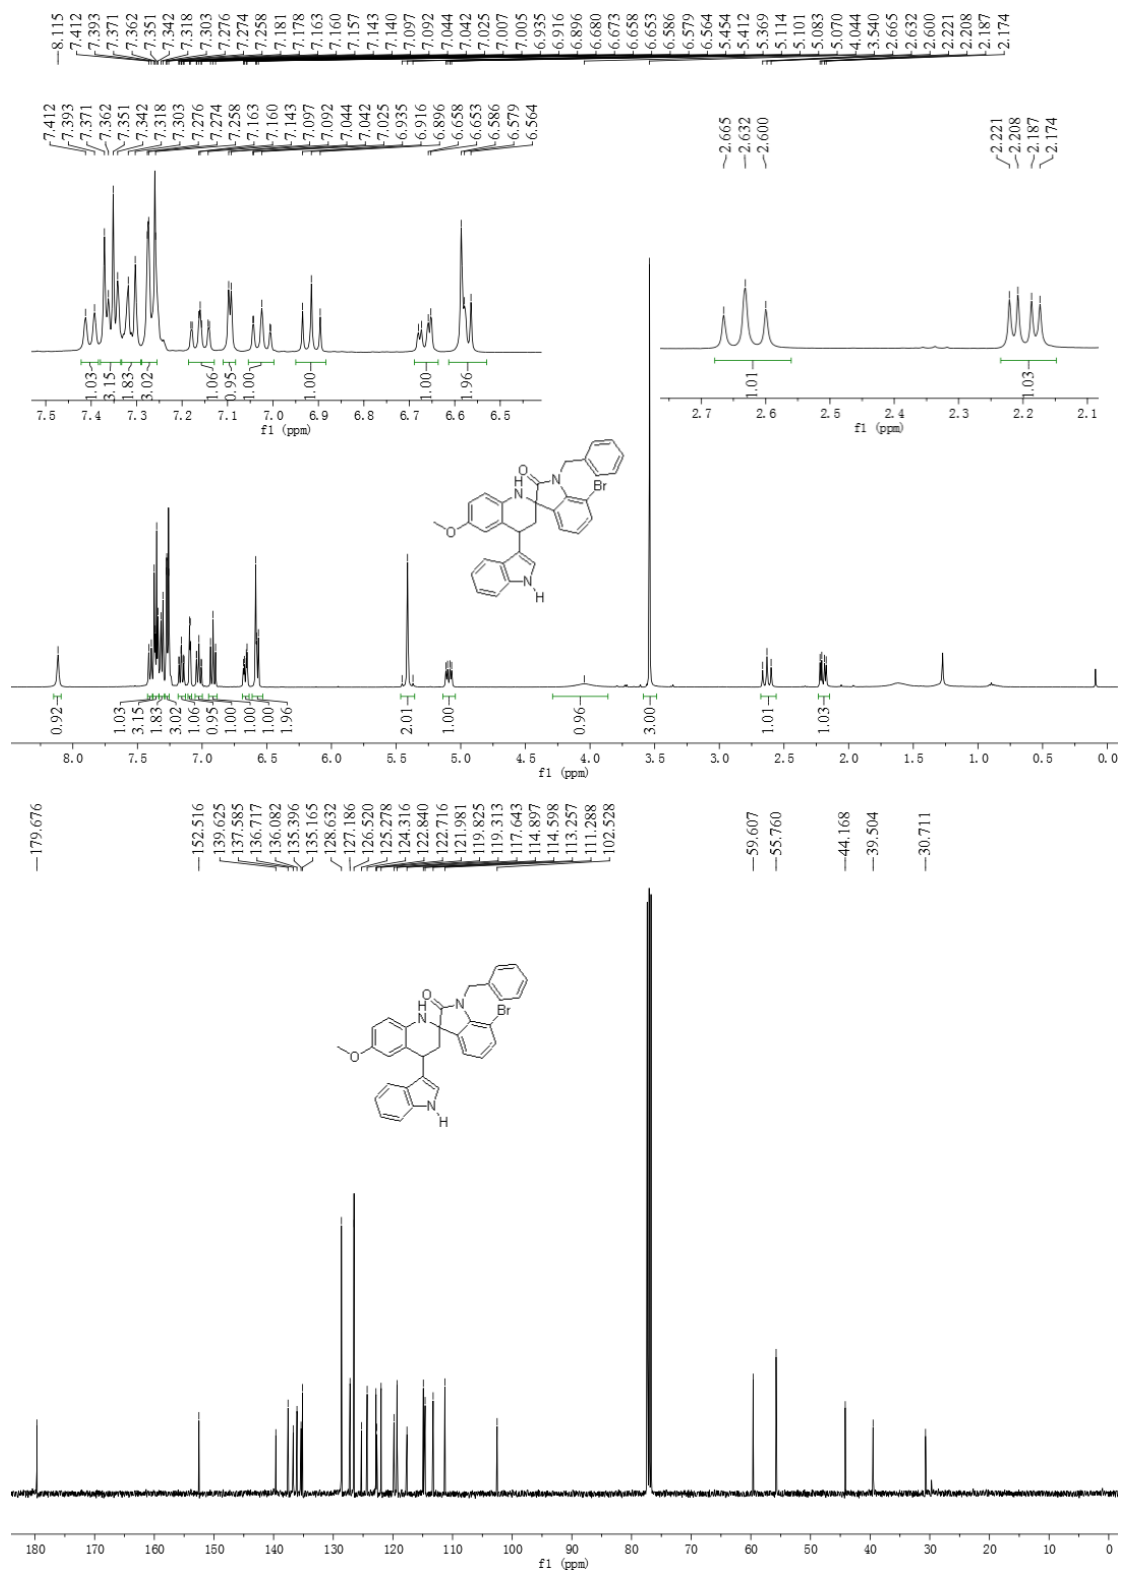

**3na**

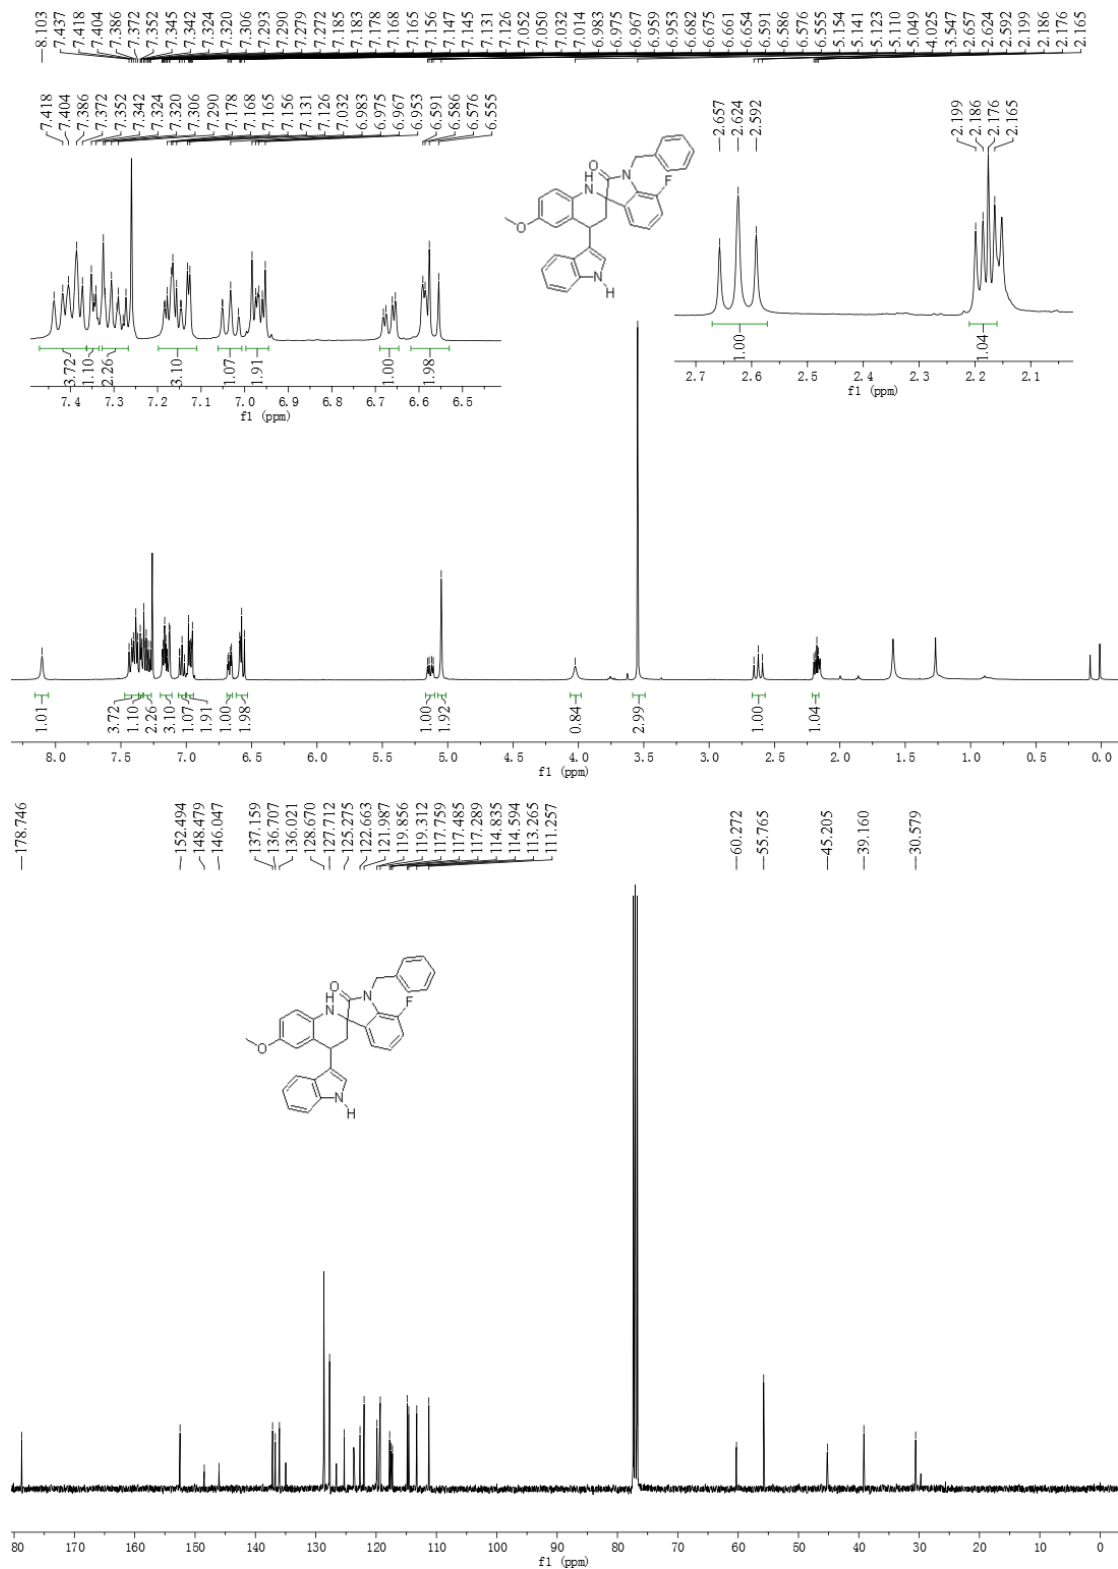

30a

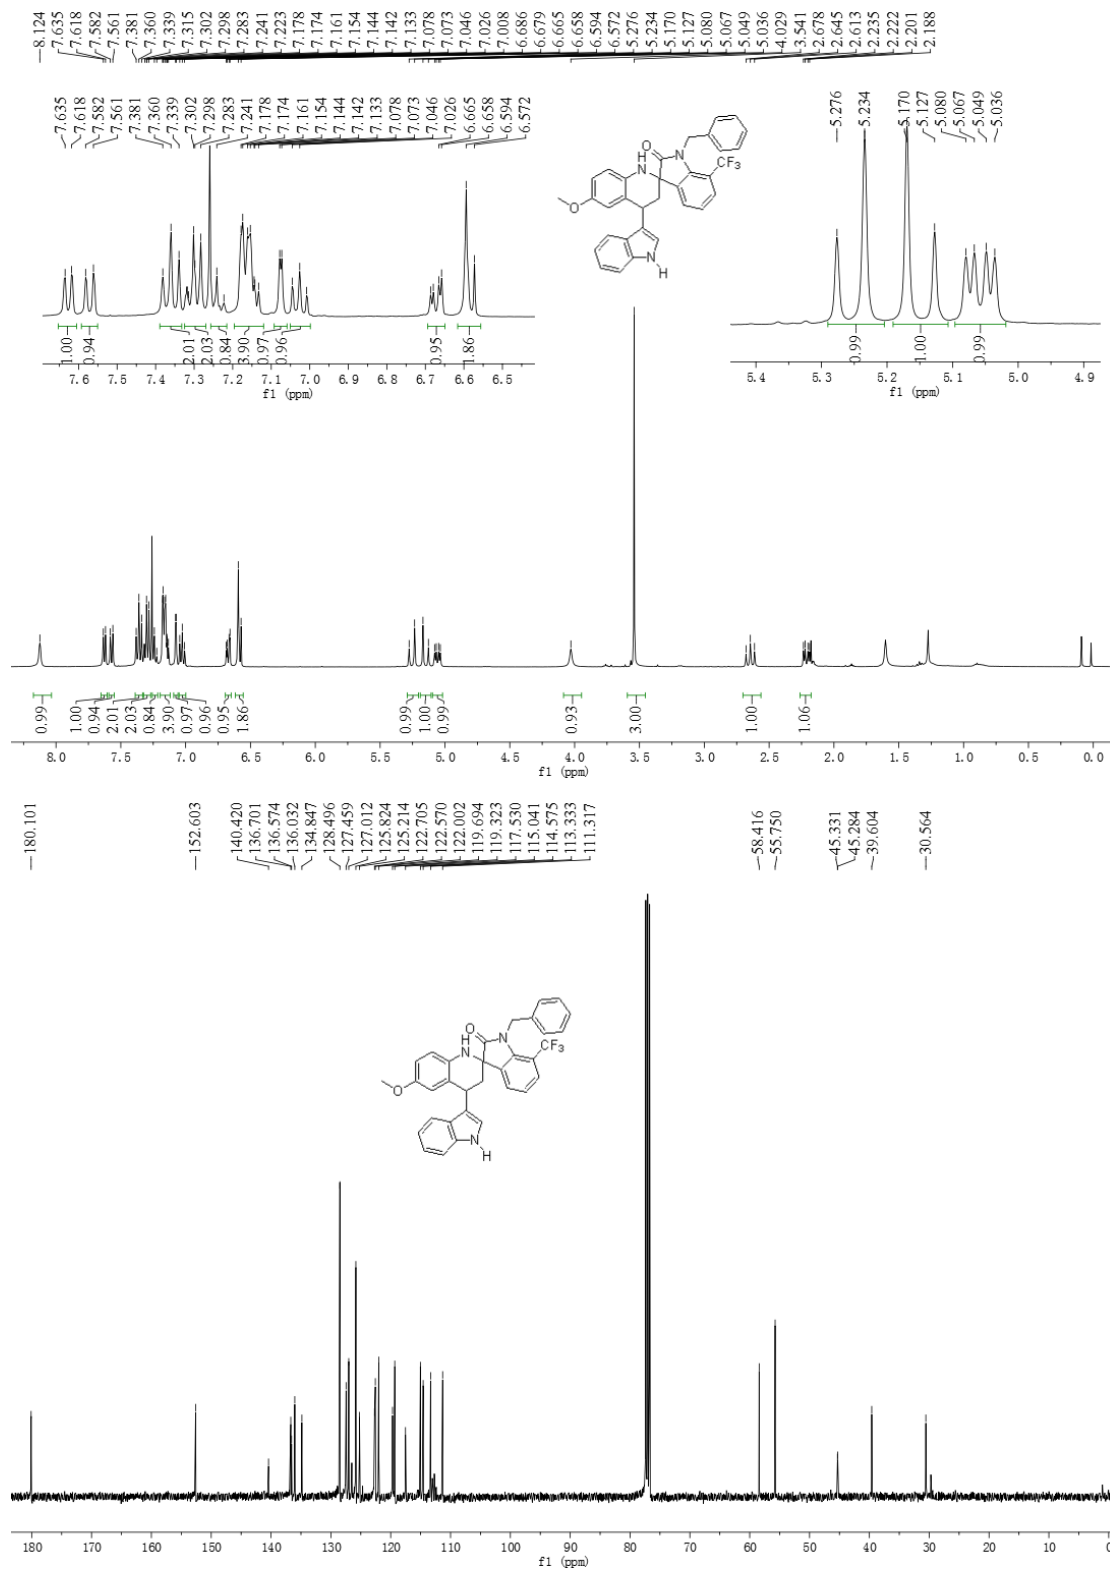

### 3pa

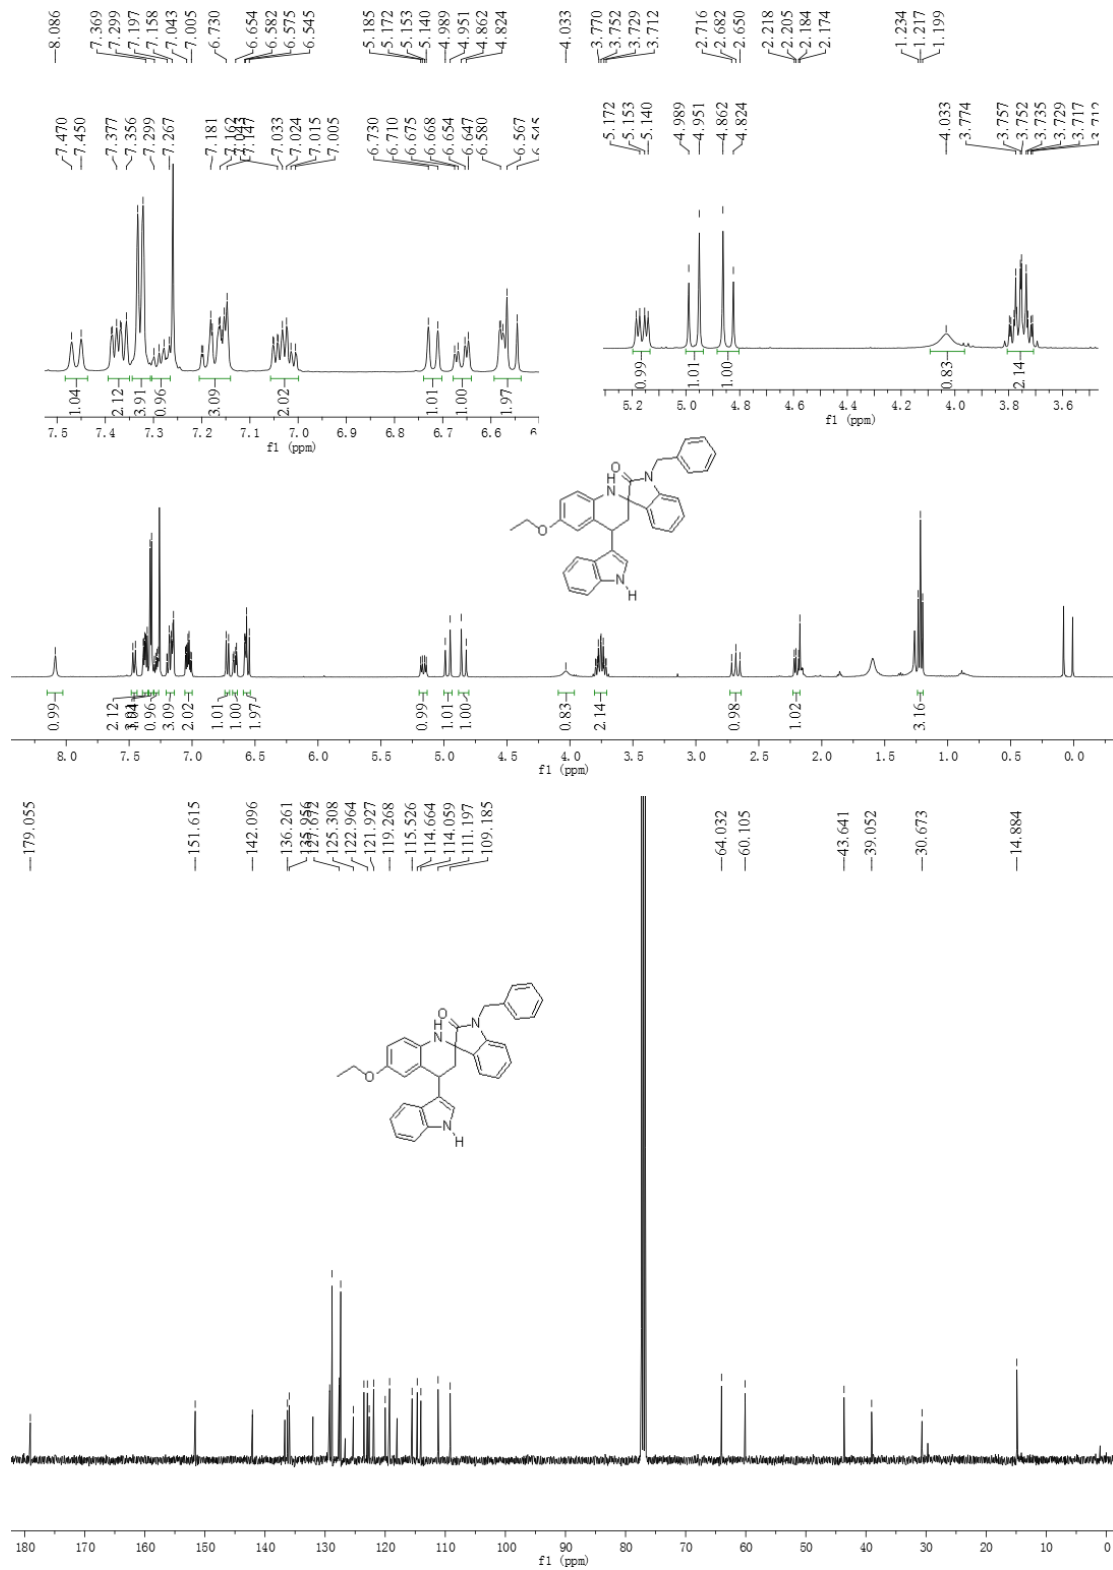



### 3qa

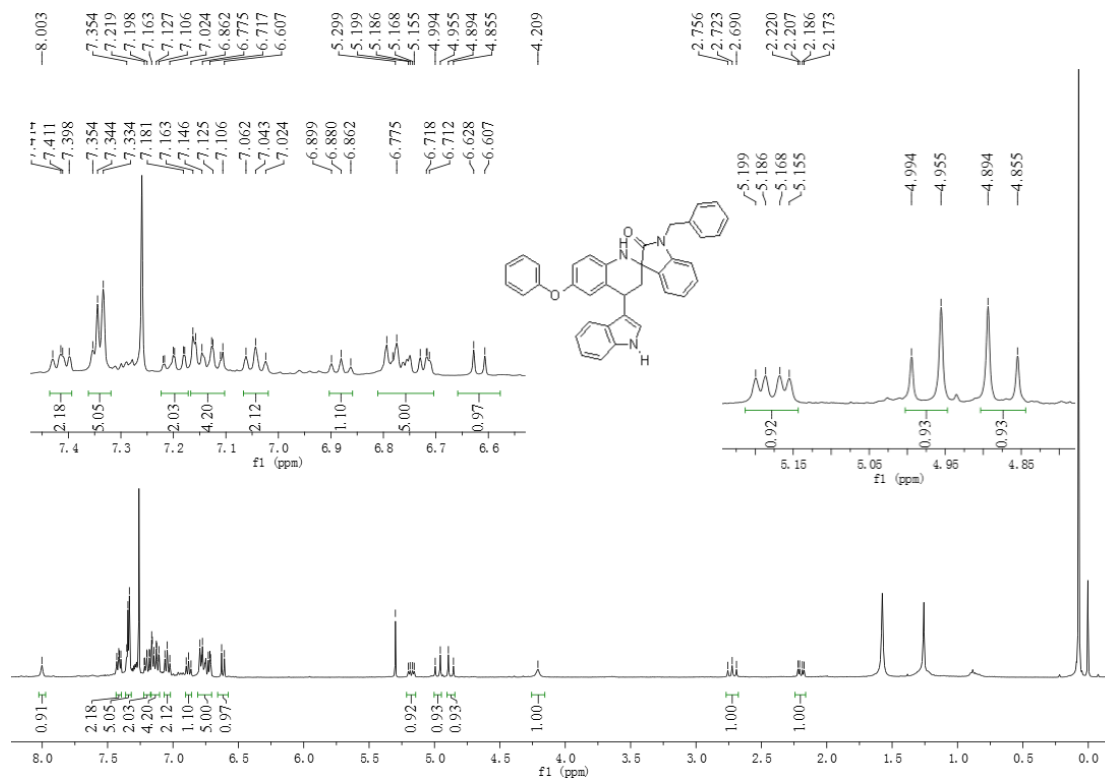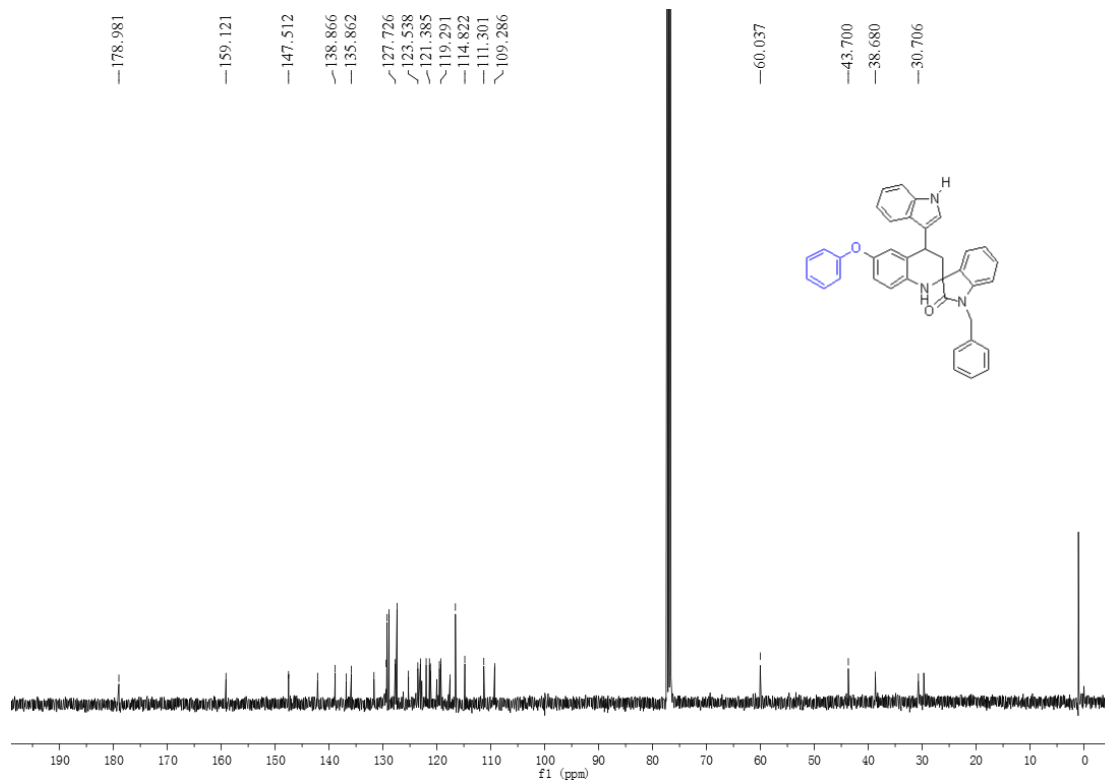

**3ra**

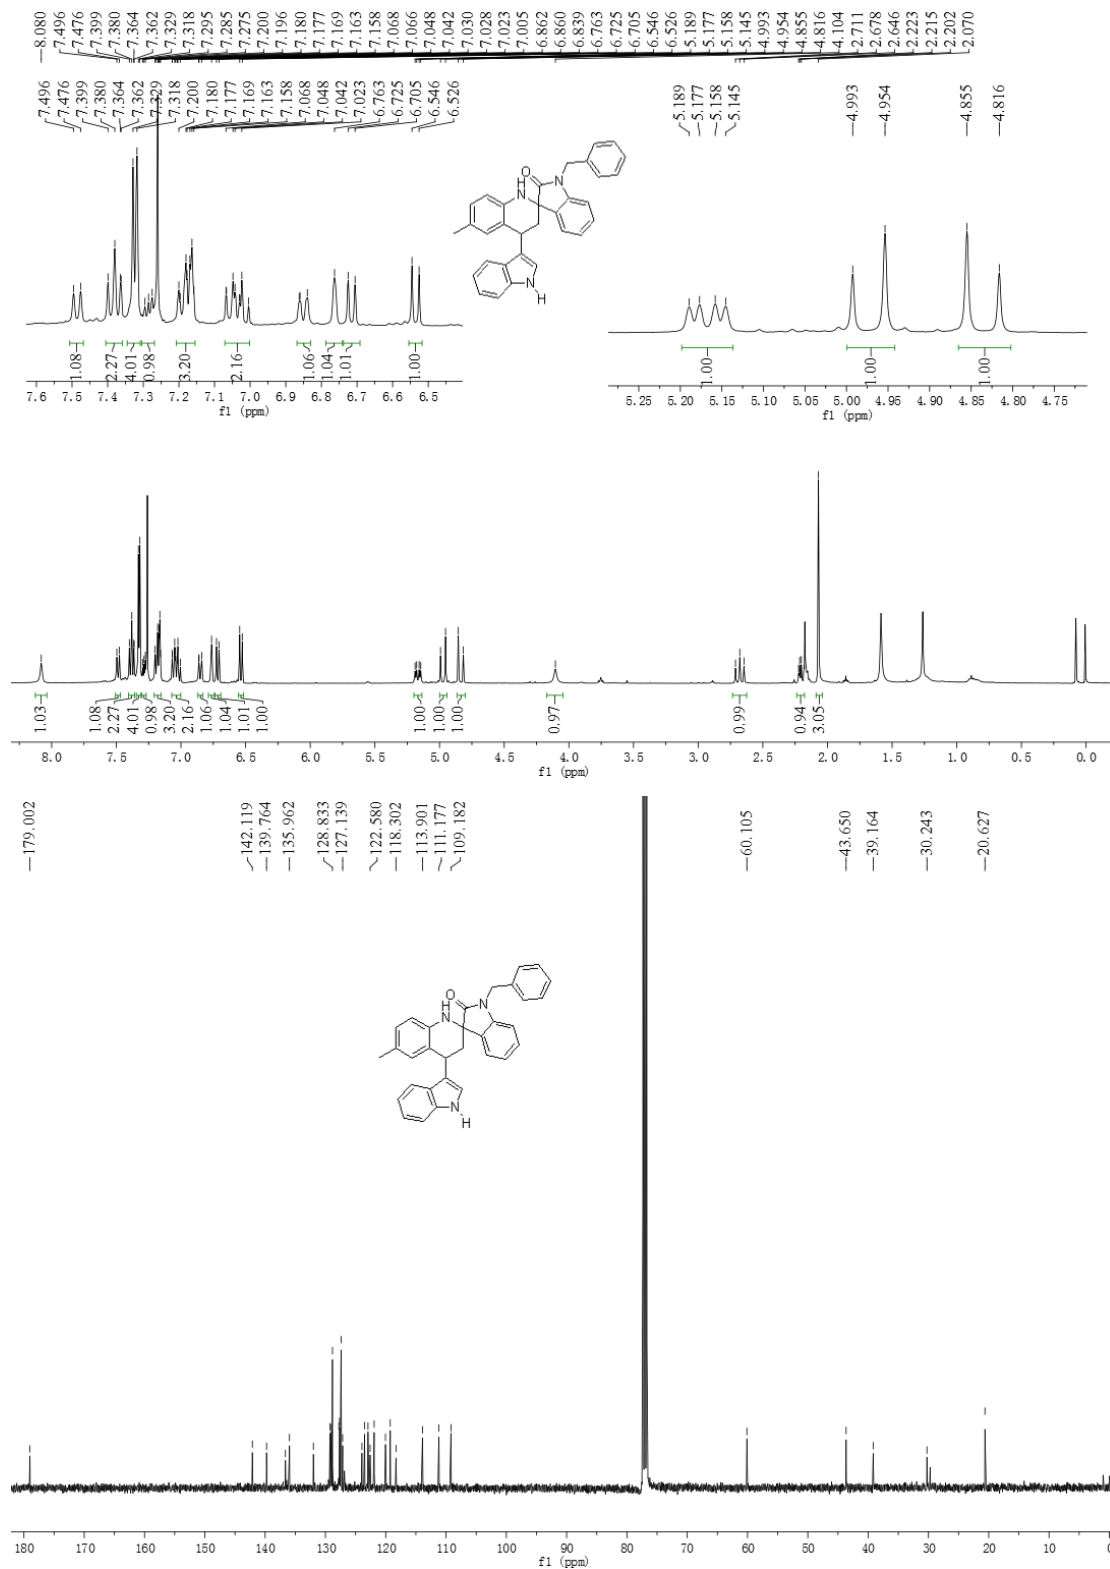

**3sa**

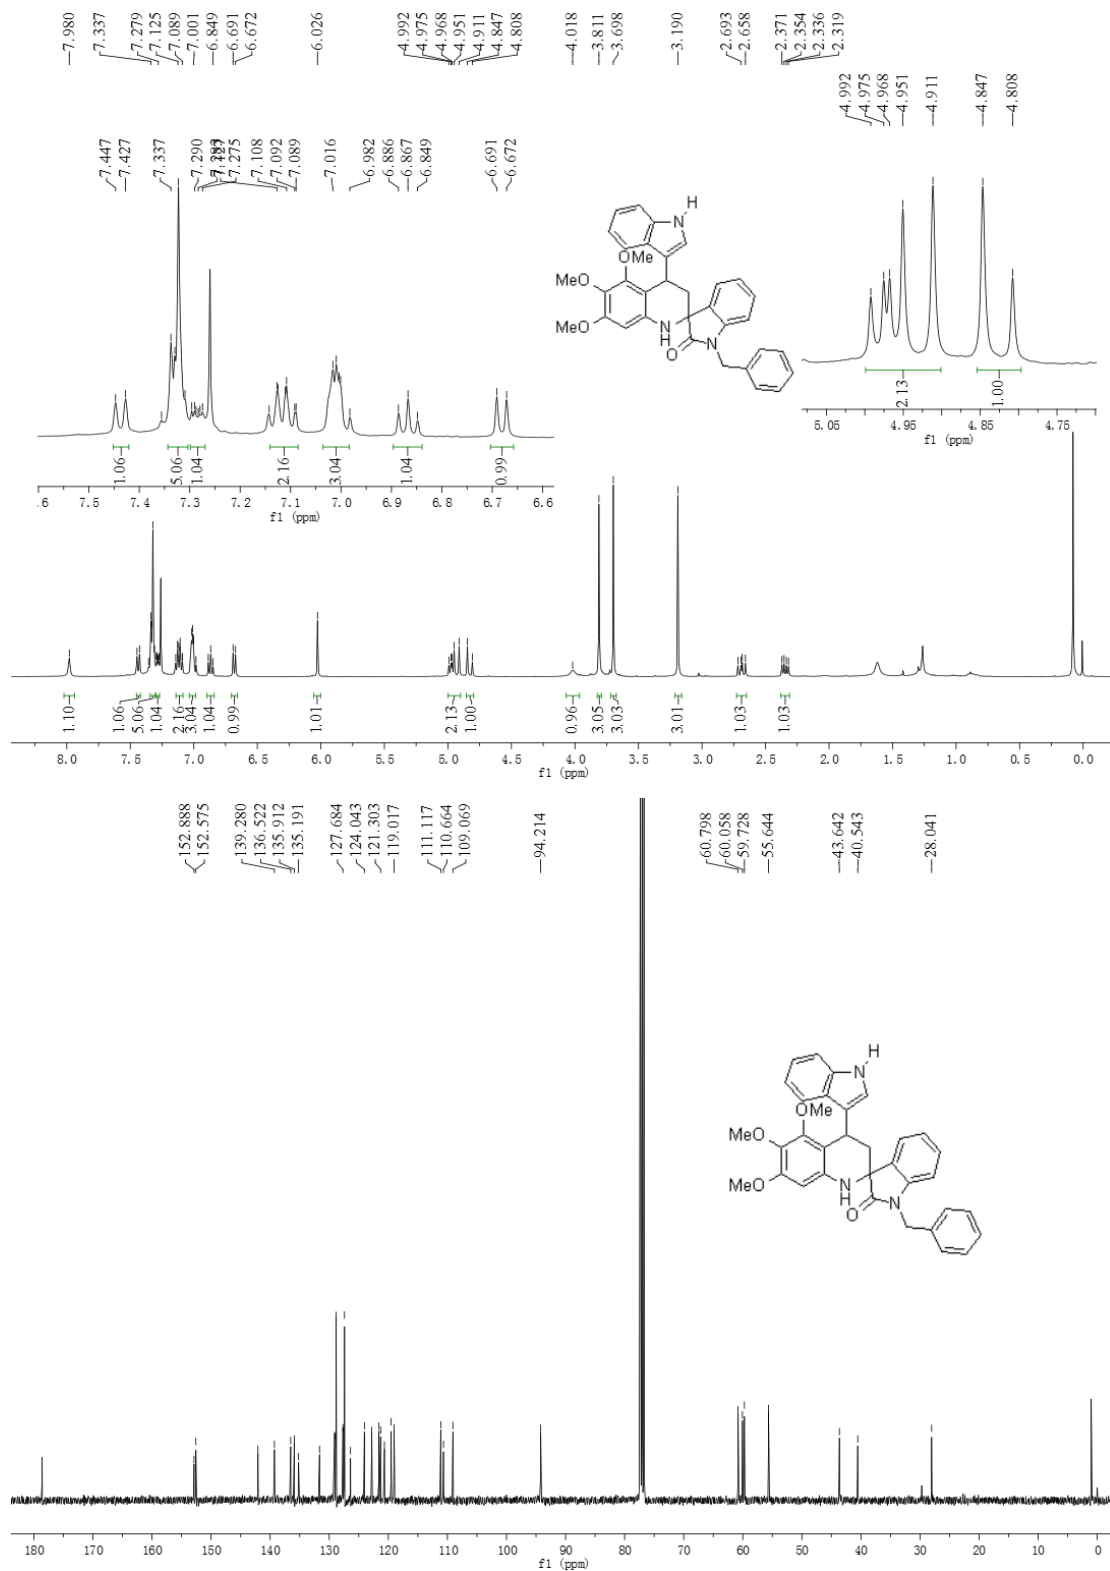

**3ab**

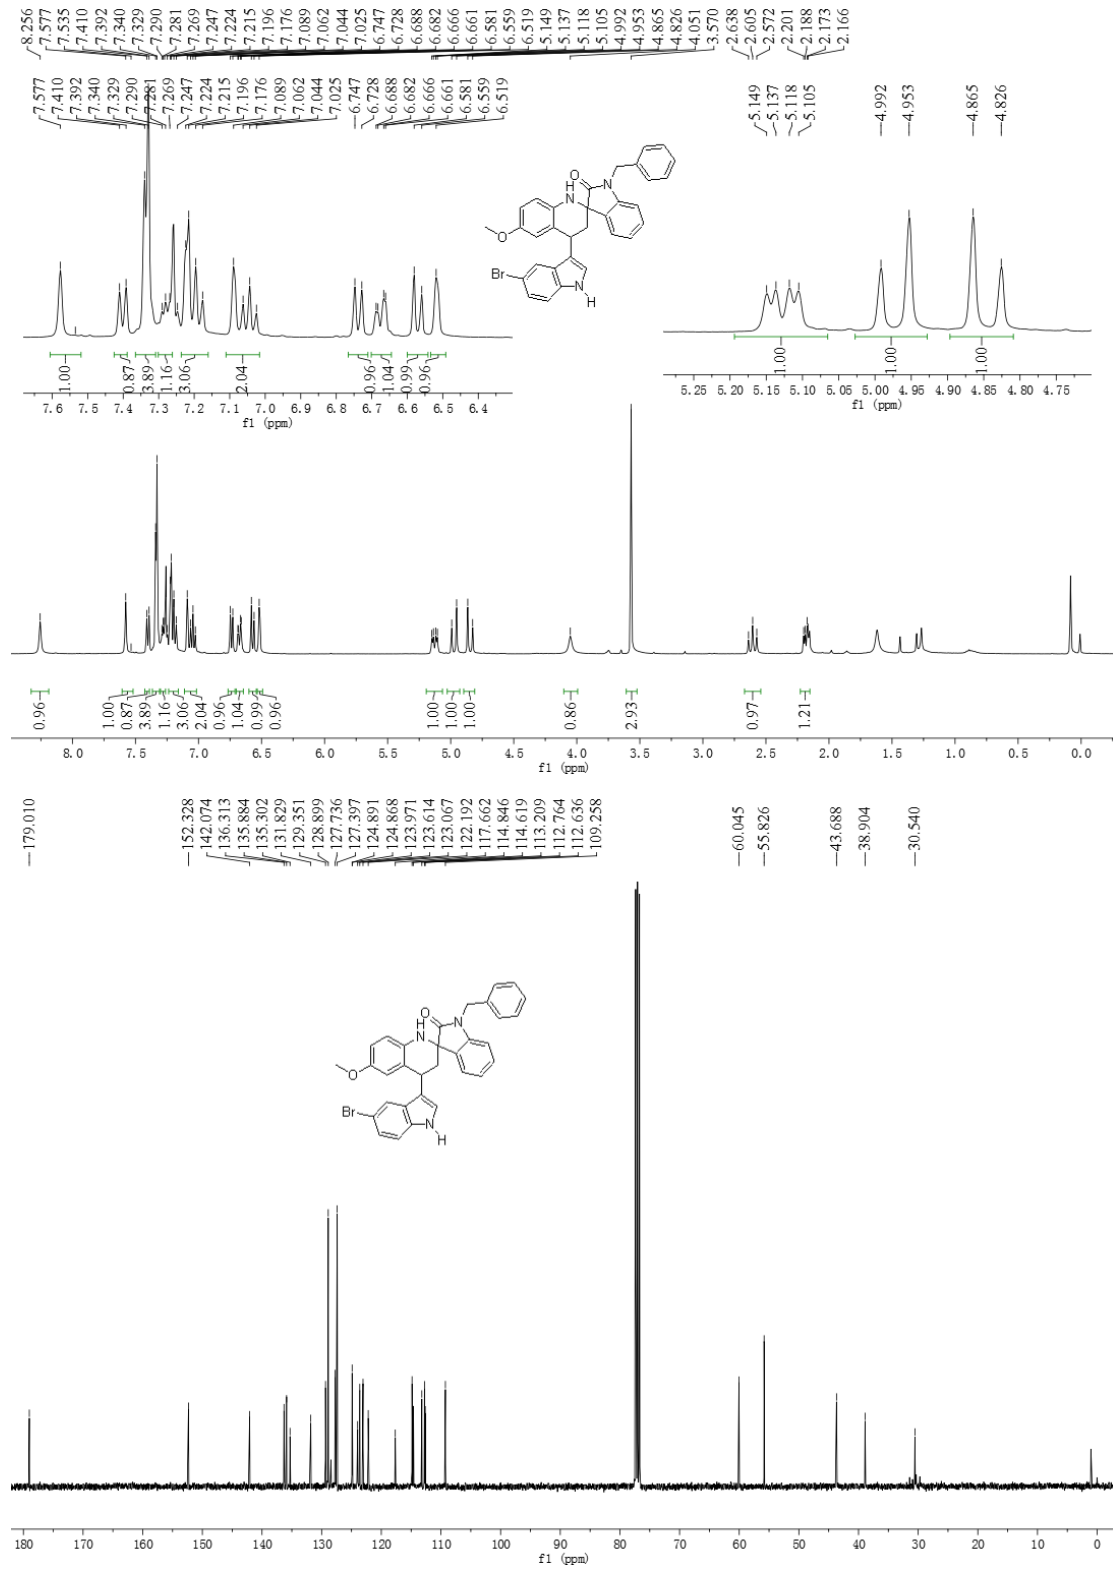

## HPLC Spectra of products 3

3aa

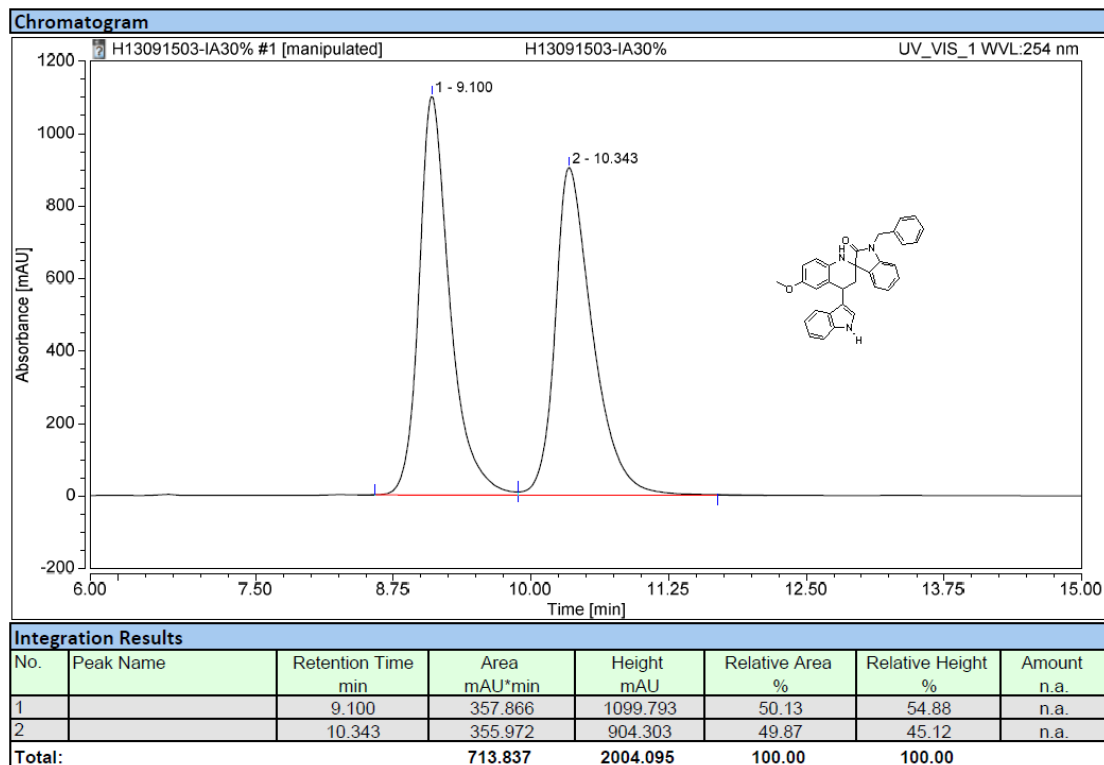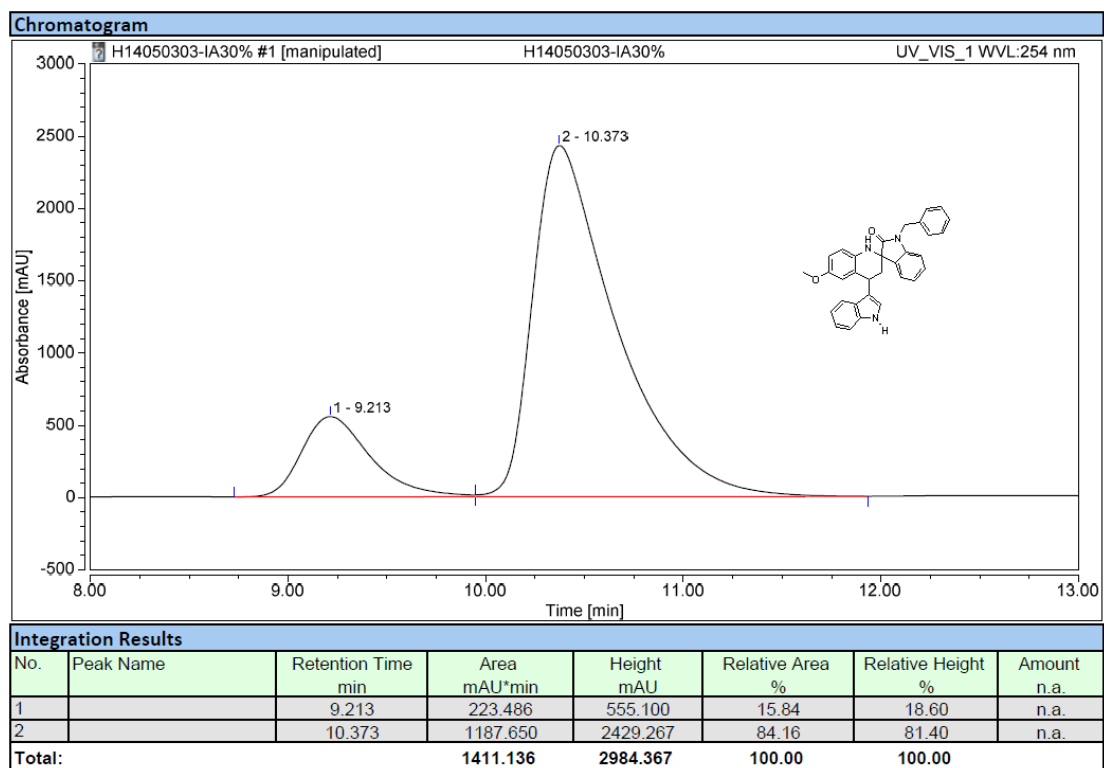

### 3ba

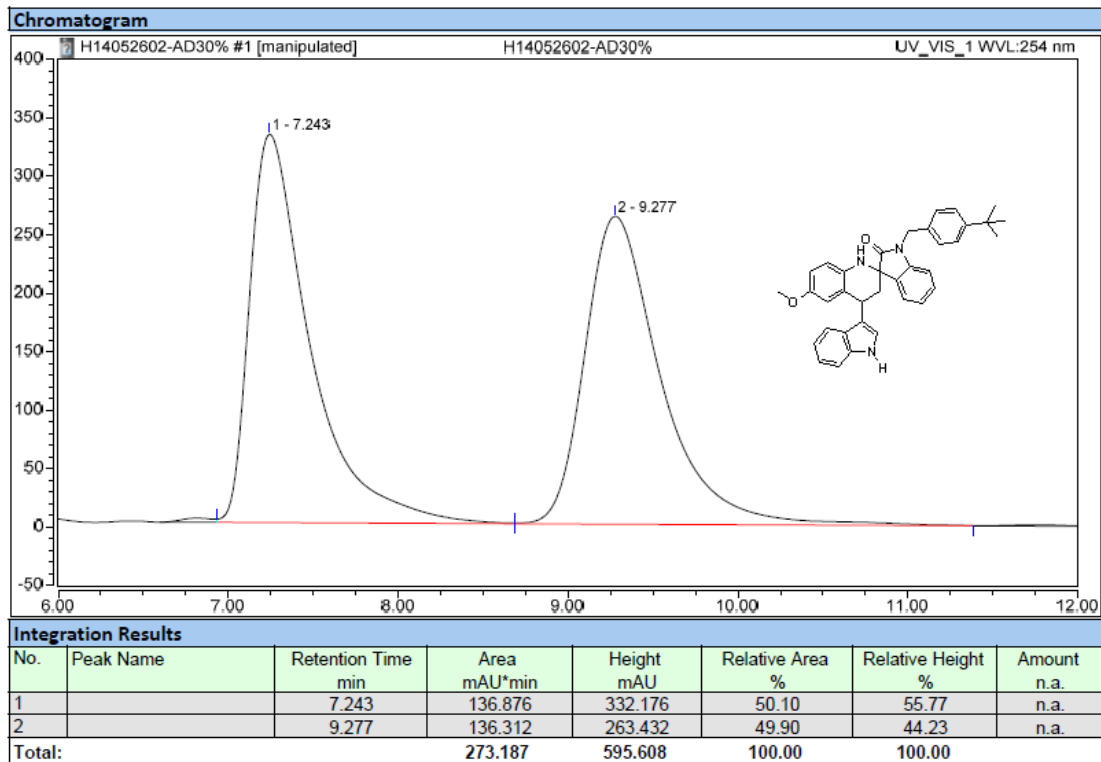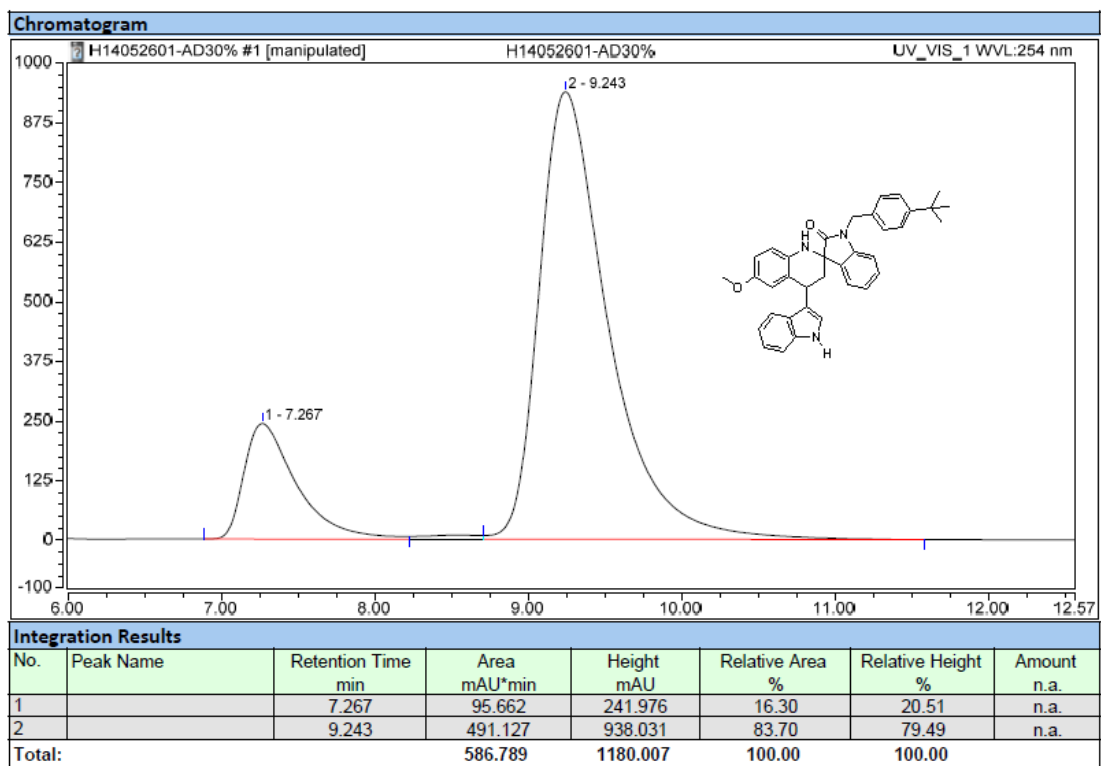

3ca

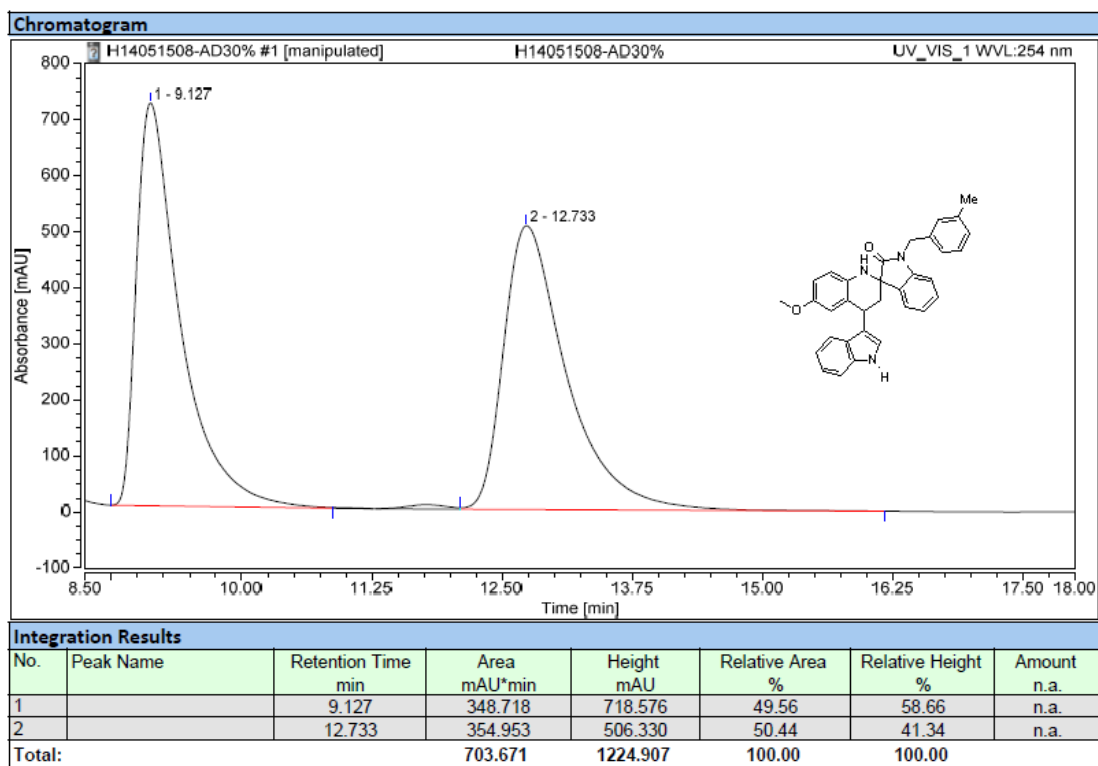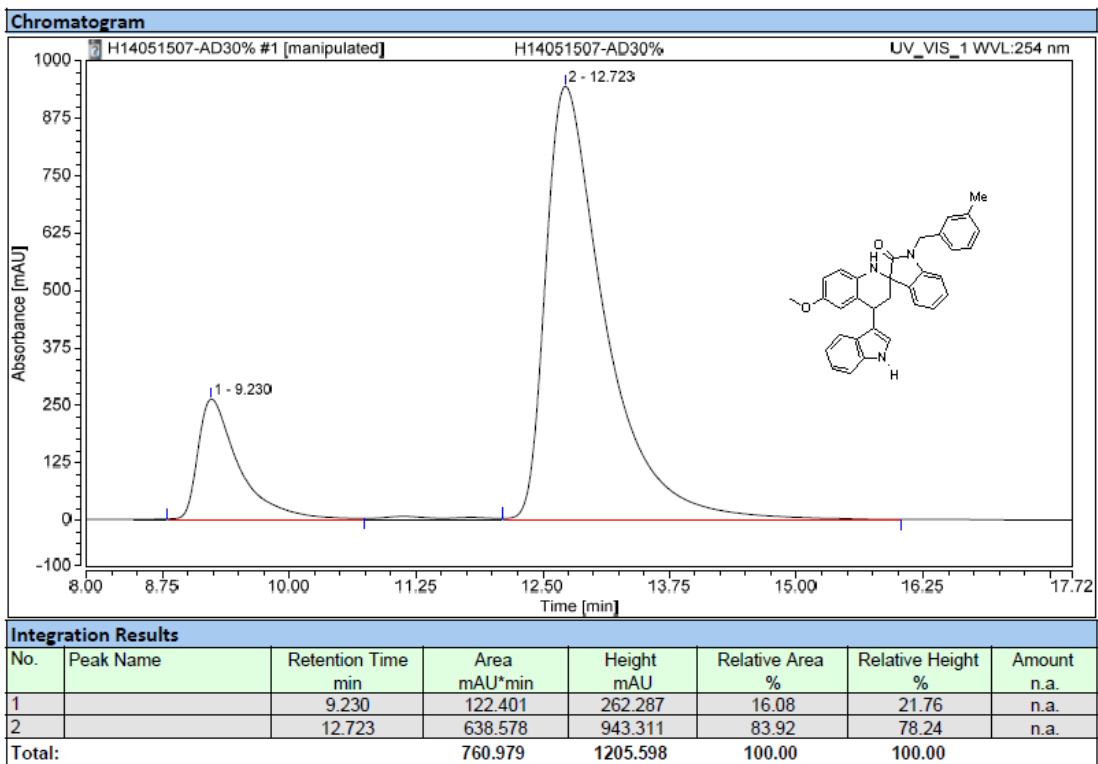

### 3da

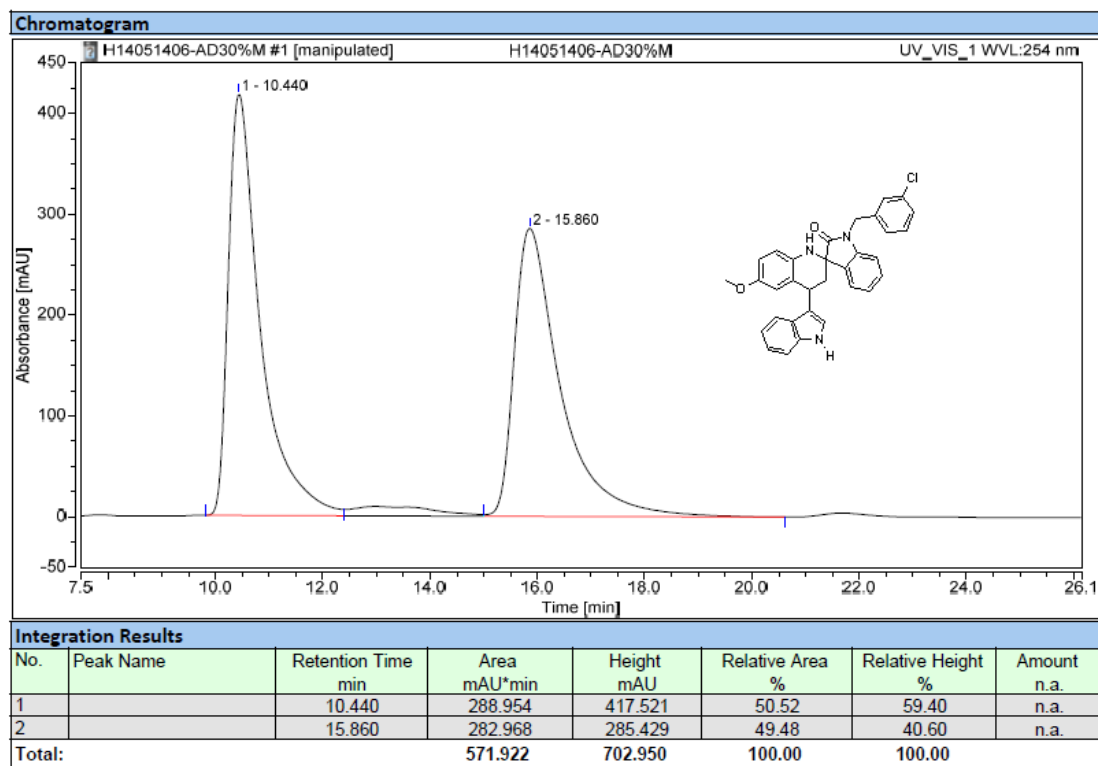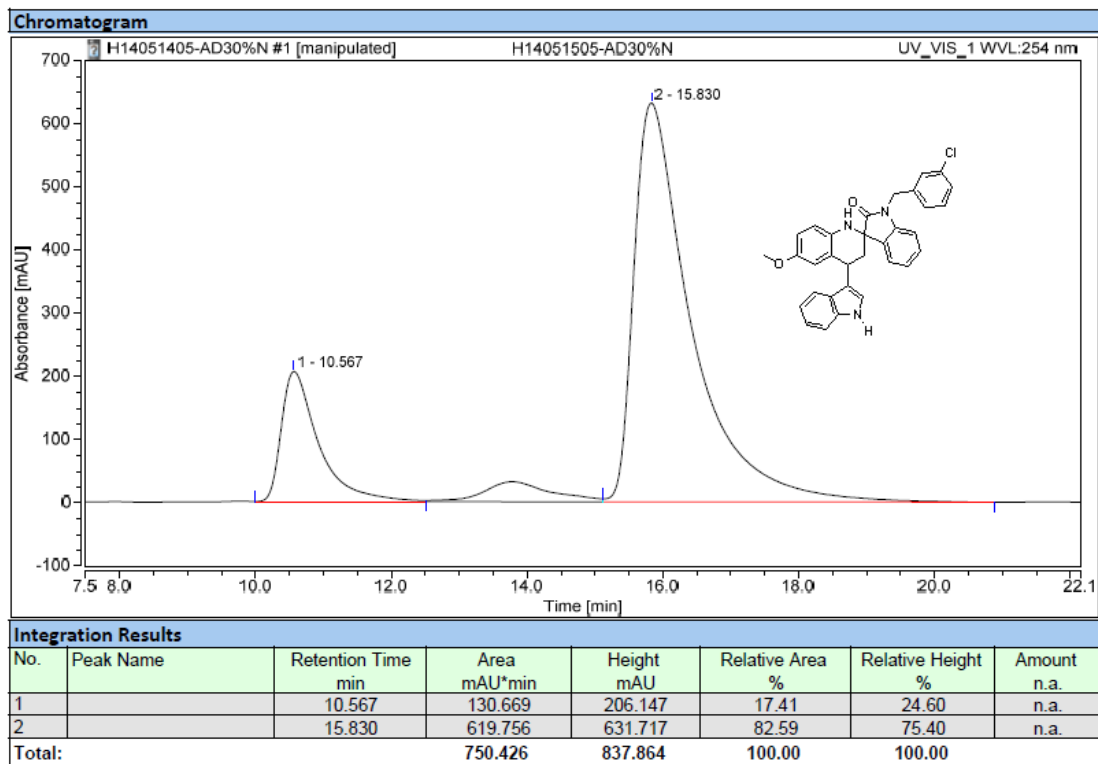



### 3ea

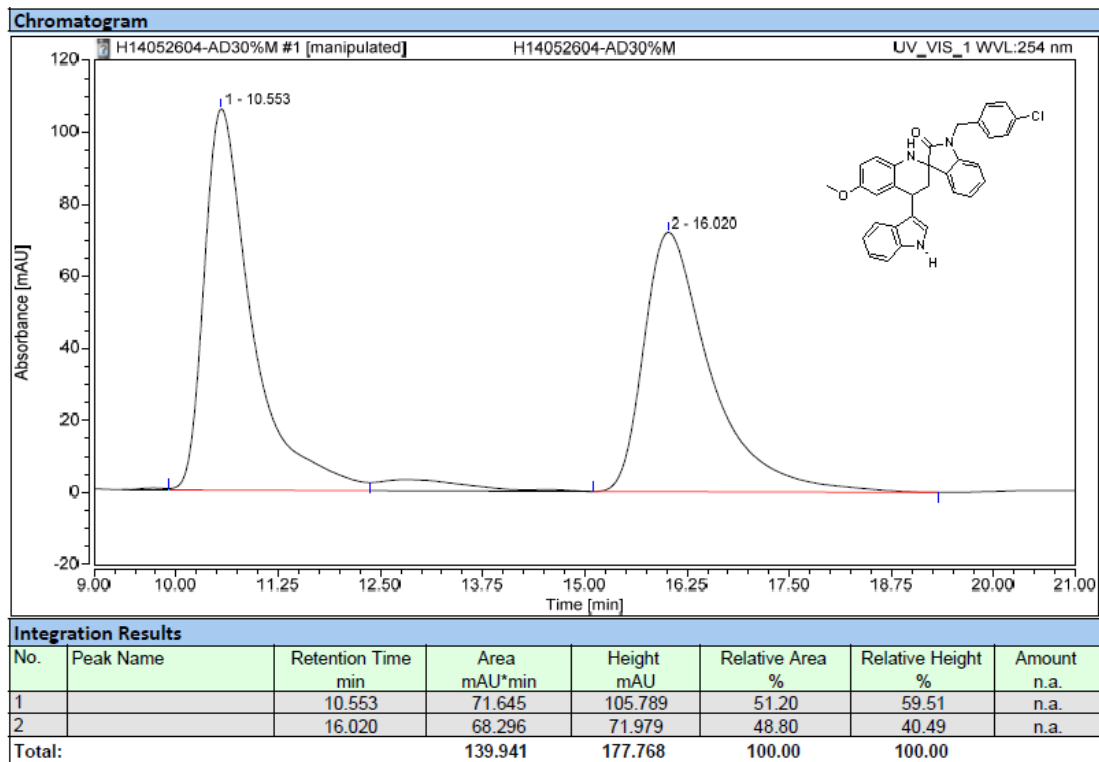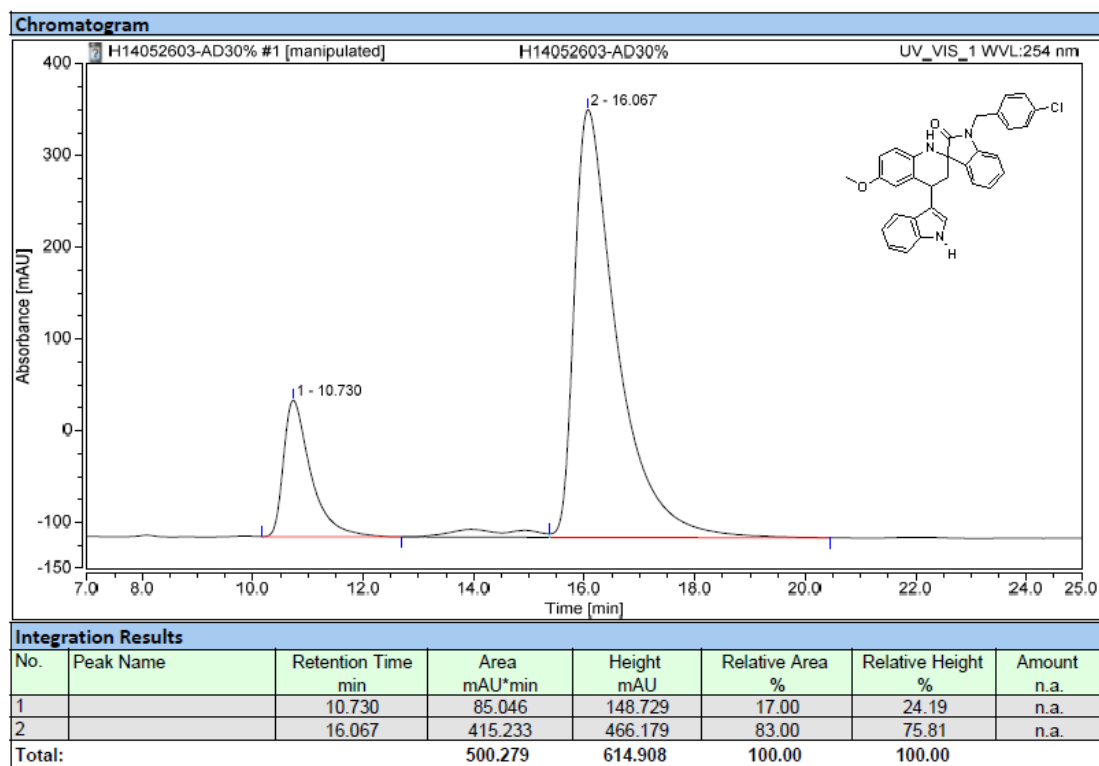

3fa

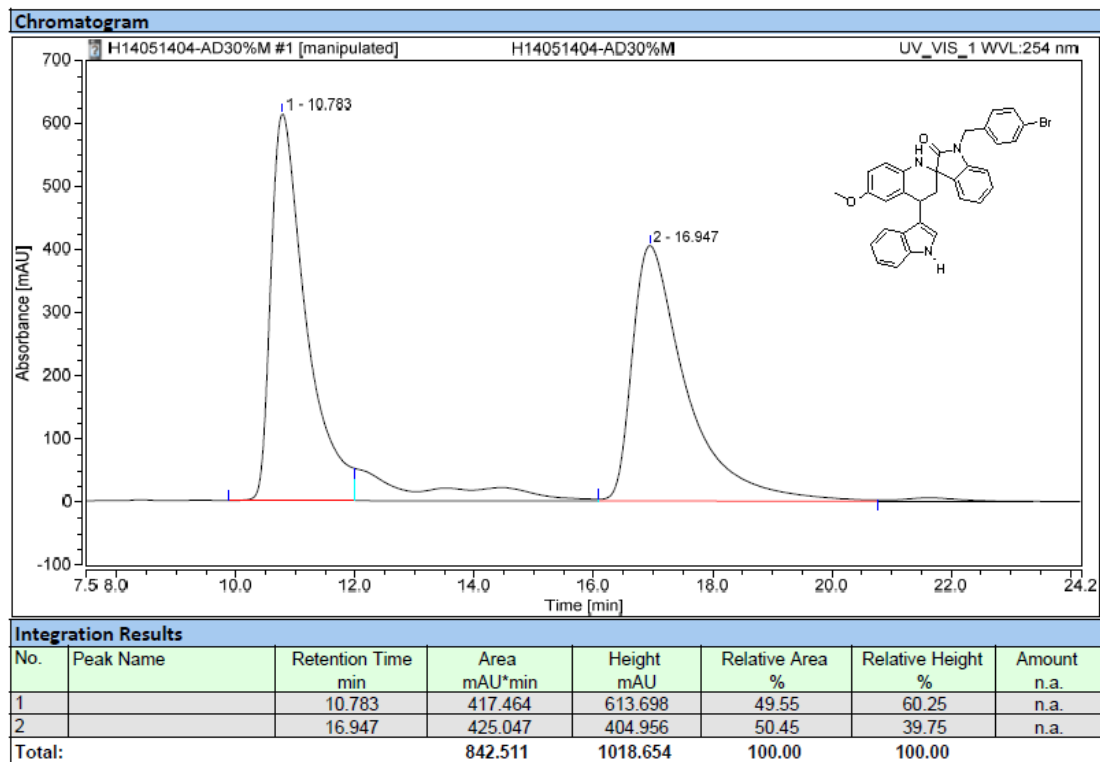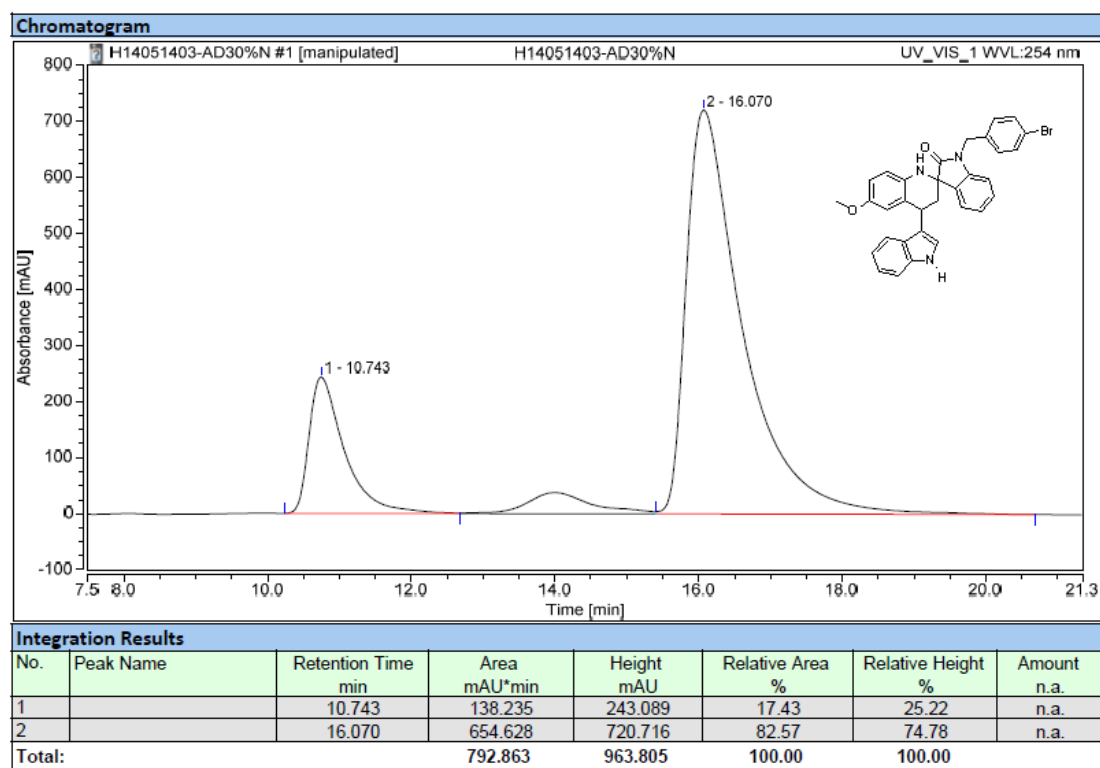

### 3ga

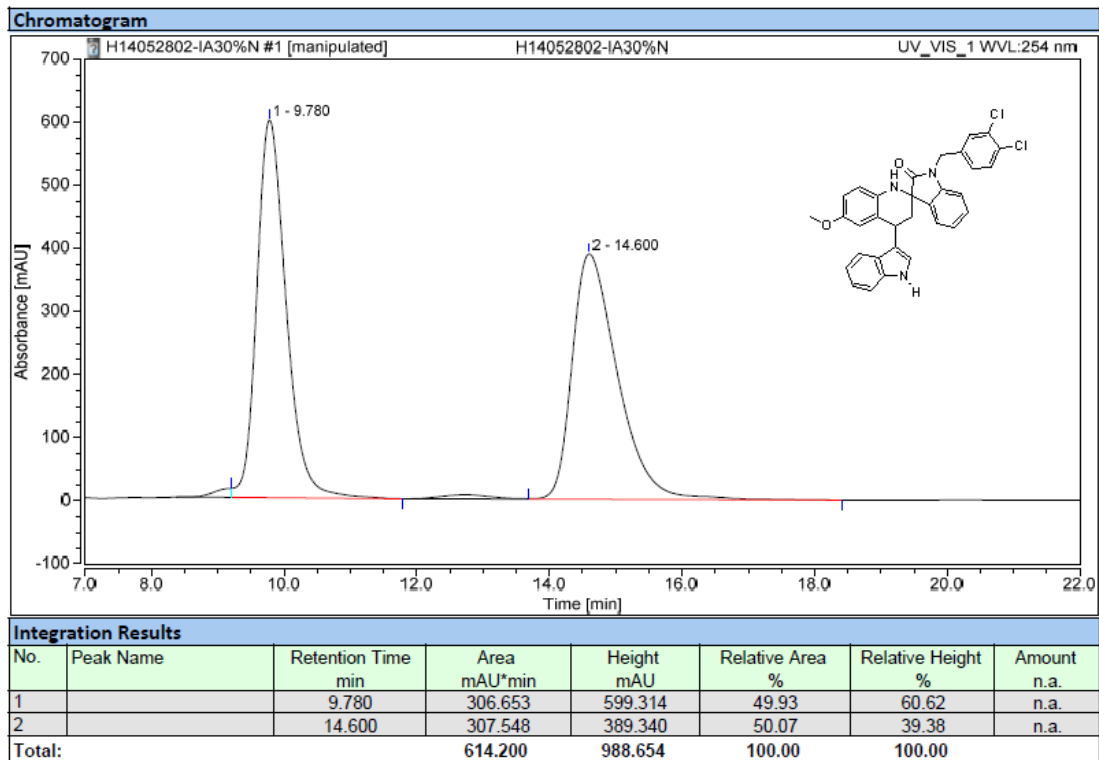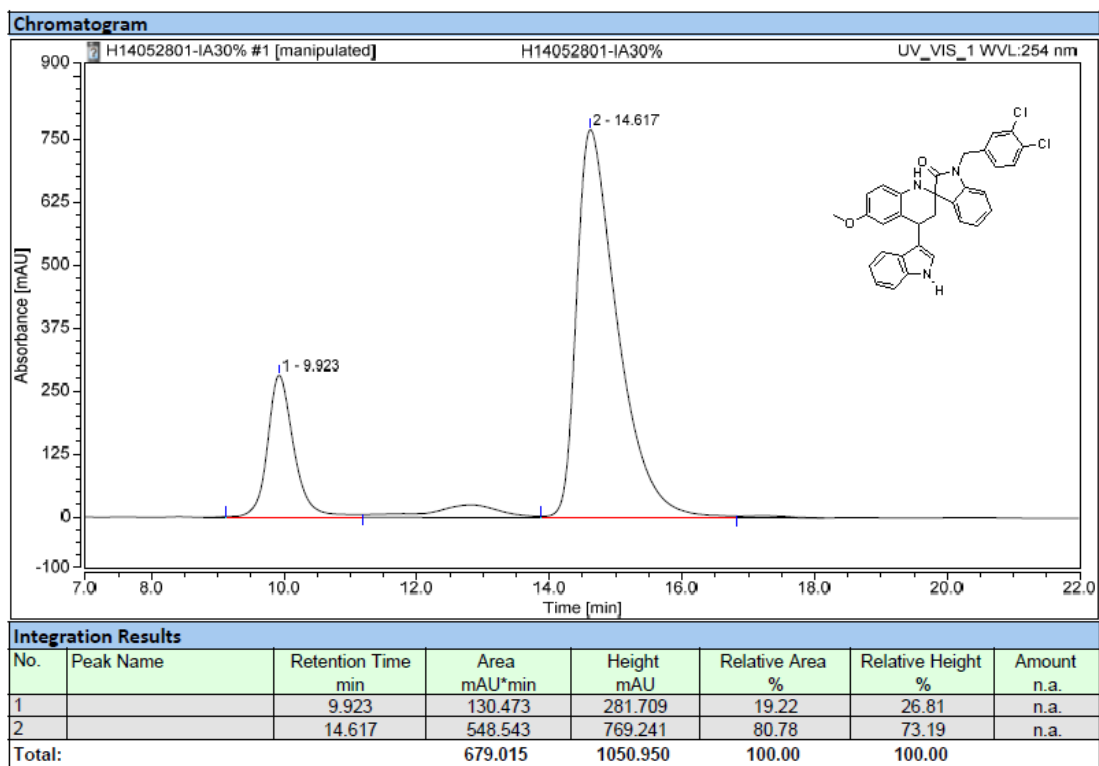

### 3ha

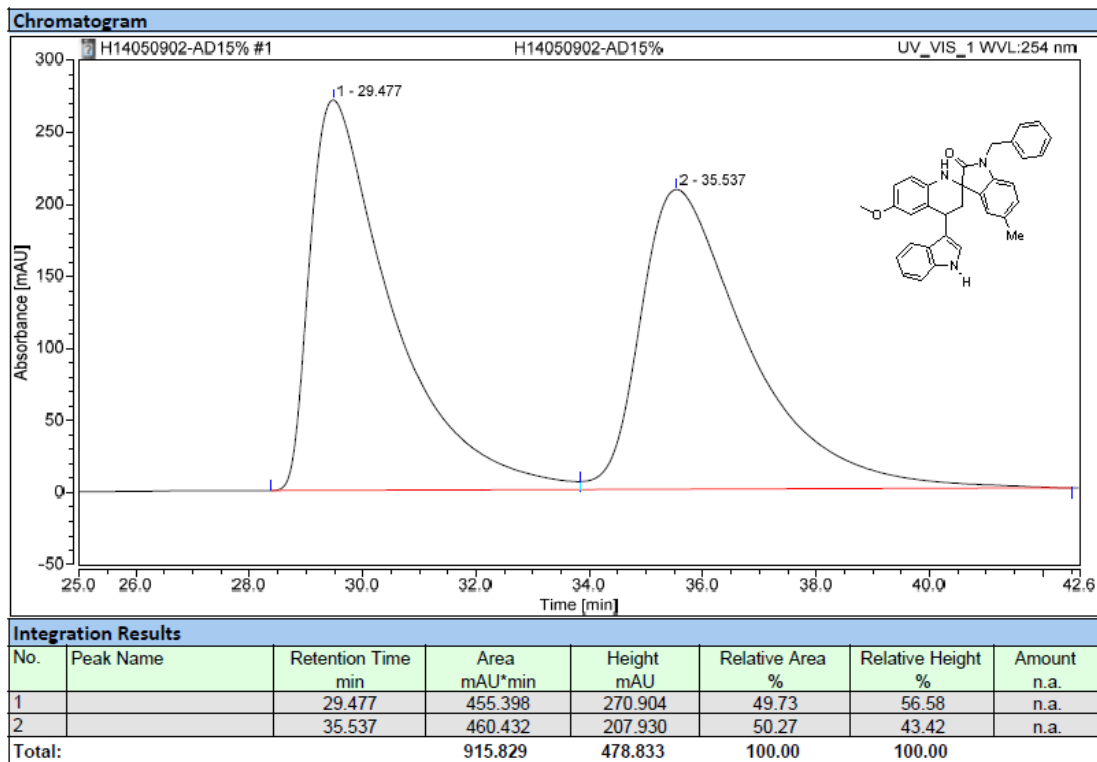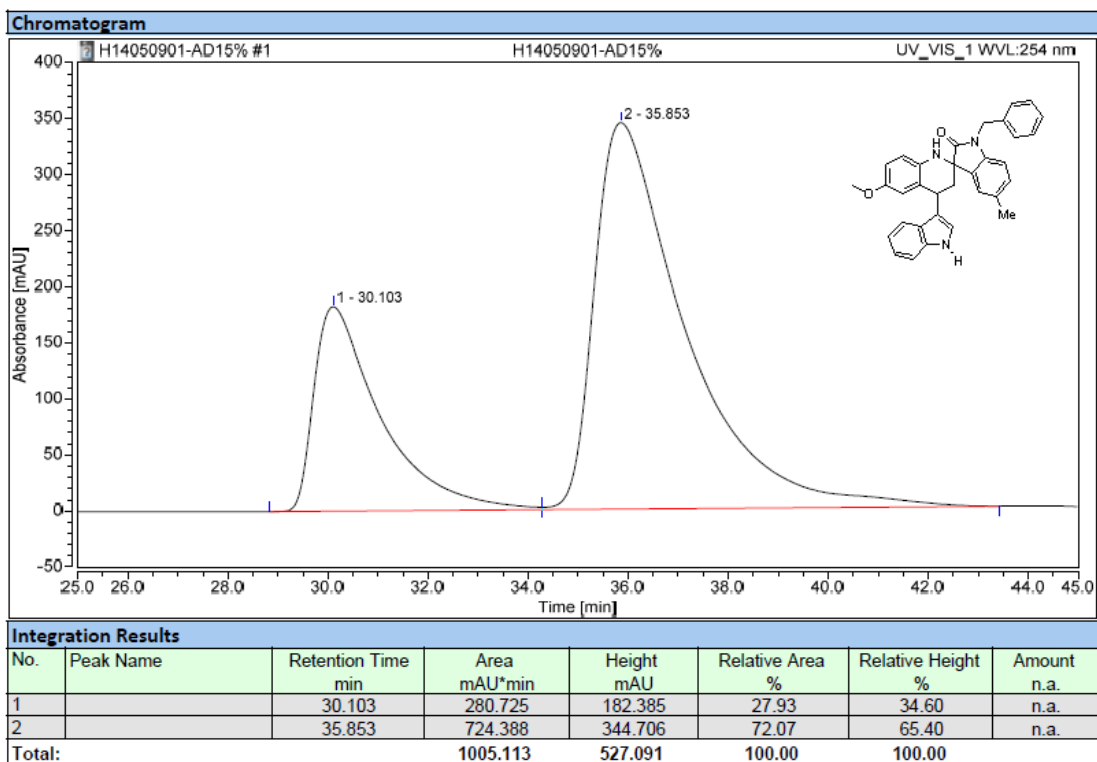

### 3ia

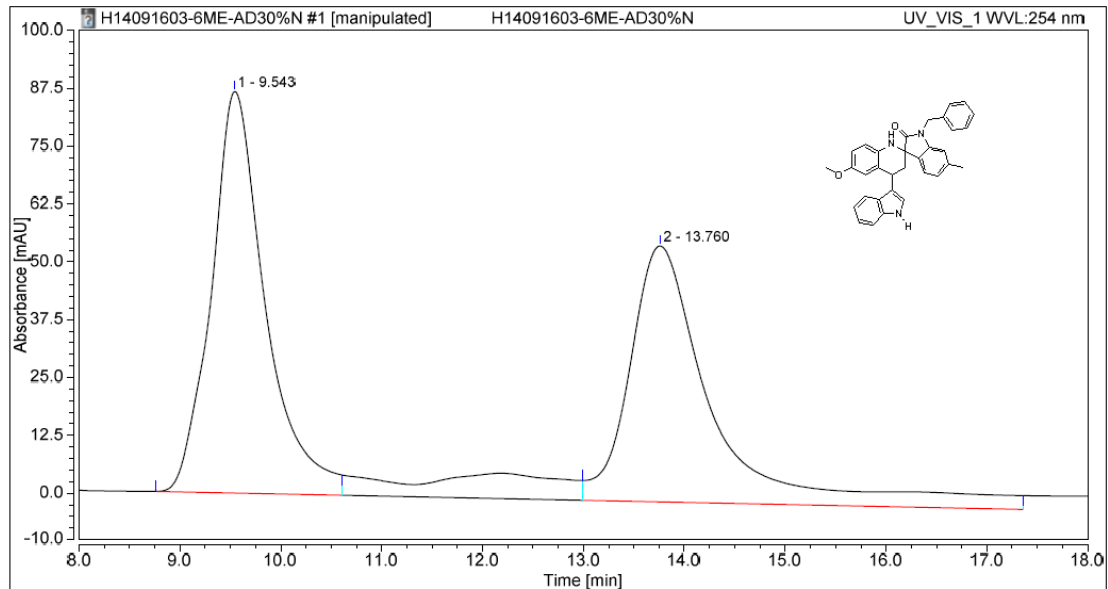

| No.           | Peak Name | Retention Time min | Area mAU*min   | Height mAU     | Relative Area % | Relative Height % | Amount |
|---------------|-----------|--------------------|----------------|----------------|-----------------|-------------------|--------|
| 1             |           | 9.543              | 53.593         | 86.811         | 50.08           | 61.07             | n.a.   |
| 2             |           | 13.760             | 53.422         | 55.333         | 49.92           | 38.93             | n.a.   |
| <b>Total:</b> |           |                    | <b>107.014</b> | <b>142.144</b> | <b>100.00</b>   | <b>100.00</b>     |        |

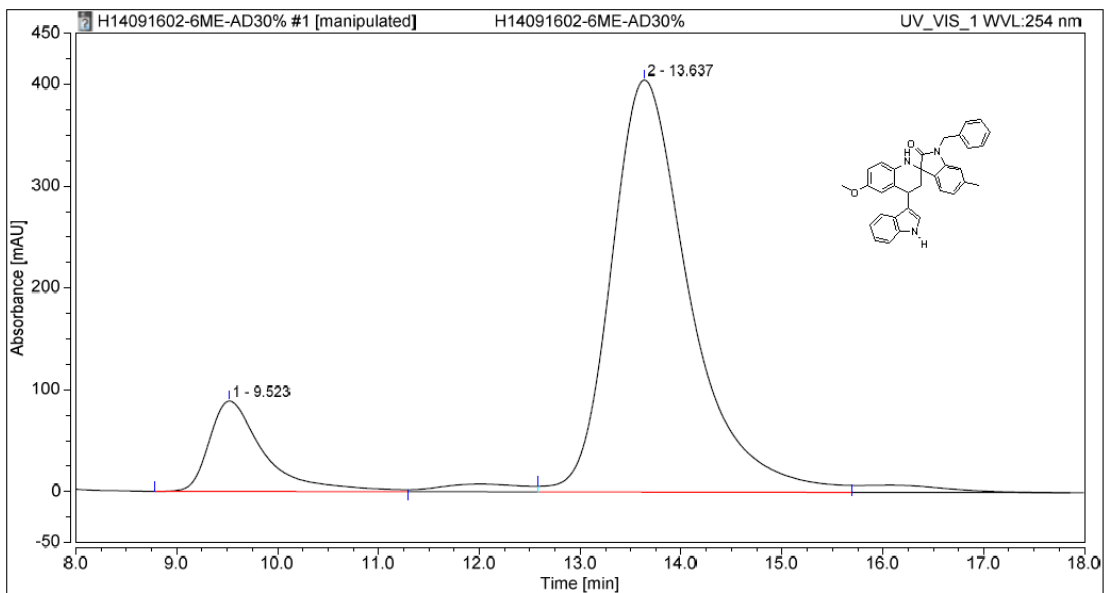

| No.           | Peak Name | Retention Time min | Area mAU*min   | Height mAU     | Relative Area % | Relative Height % | Amount |
|---------------|-----------|--------------------|----------------|----------------|-----------------|-------------------|--------|
| 1             |           | 9.523              | 55.997         | 88.965         | 13.34           | 18.02             | n.a.   |
| 2             |           | 13.637             | 363.845        | 404.759        | 86.66           | 81.98             | n.a.   |
| <b>Total:</b> |           |                    | <b>419.842</b> | <b>493.723</b> | <b>100.00</b>   | <b>100.00</b>     |        |

### 3ja

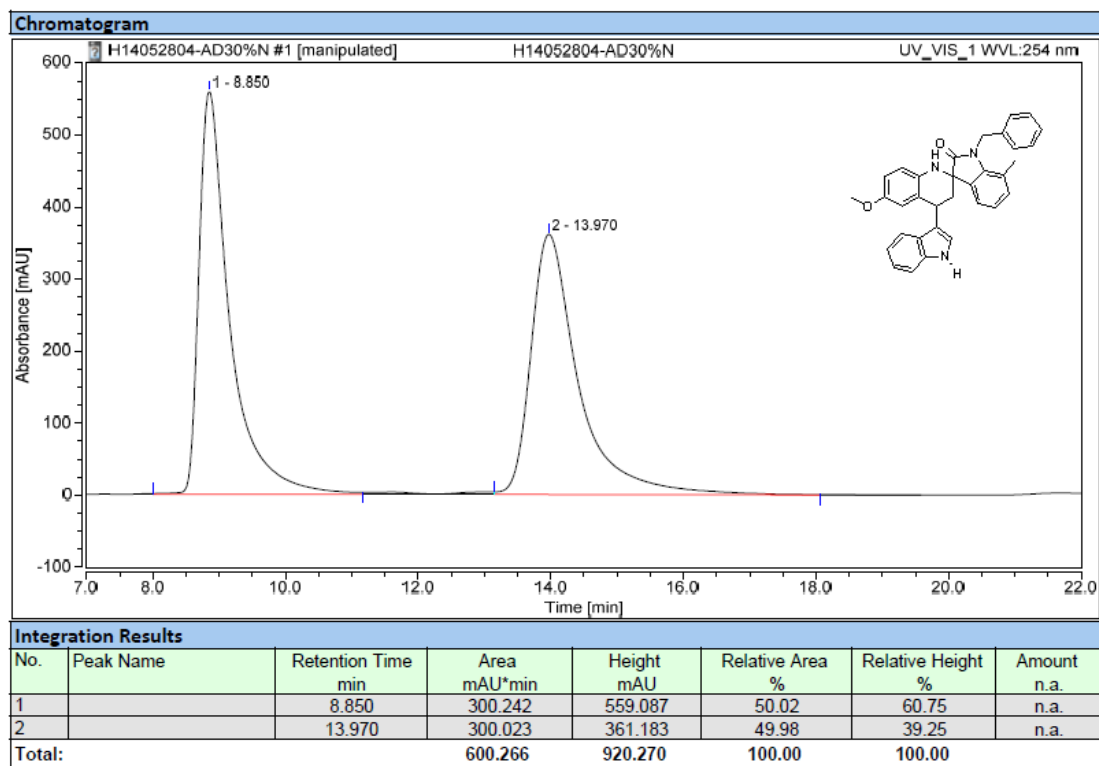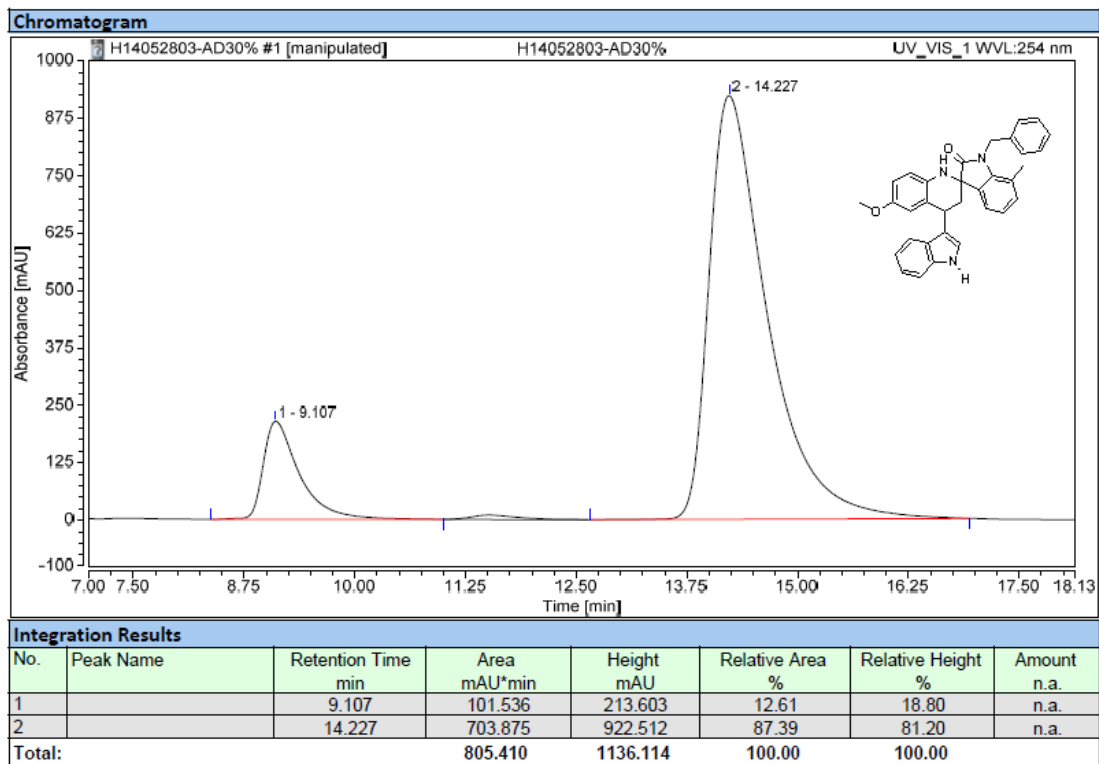

3ka

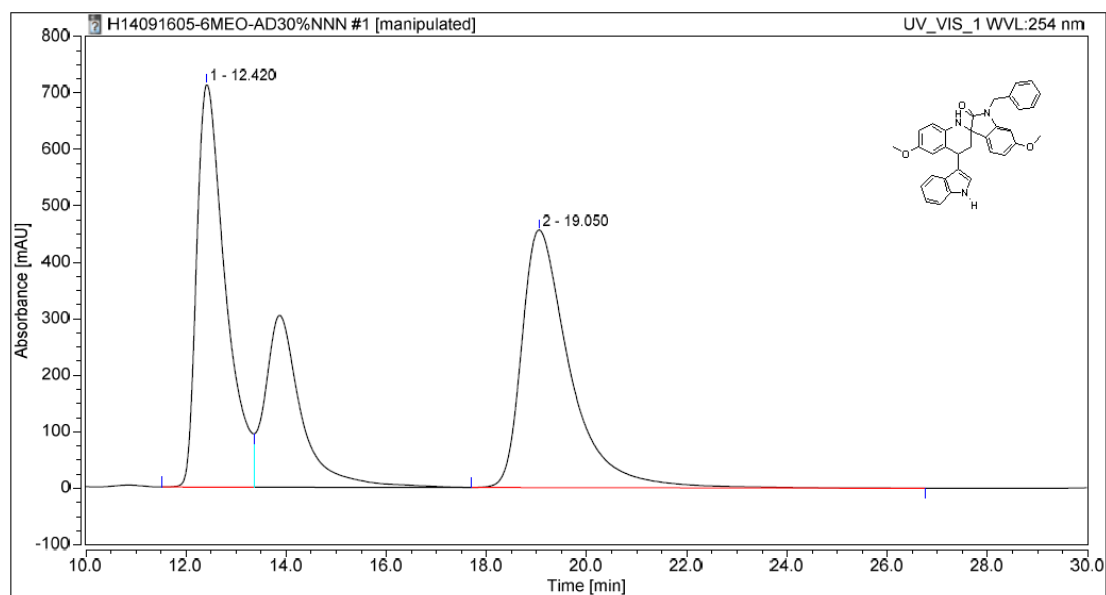

| Integration Results |           |                    |                |                 |                 |                   |             |
|---------------------|-----------|--------------------|----------------|-----------------|-----------------|-------------------|-------------|
| No.                 | Peak Name | Retention Time min | Area mAU*min   | Height mAU      | Relative Area % | Relative Height % | Amount n.a. |
| 1                   |           | 12.420             | 474.134        | 713.198         | 48.33           | 60.98             | n.a.        |
| 2                   |           | 19.050             | 506.905        | 456.374         | 51.67           | 39.02             | n.a.        |
| <b>Total:</b>       |           |                    | <b>981.039</b> | <b>1169.572</b> | <b>100.00</b>   | <b>100.00</b>     |             |

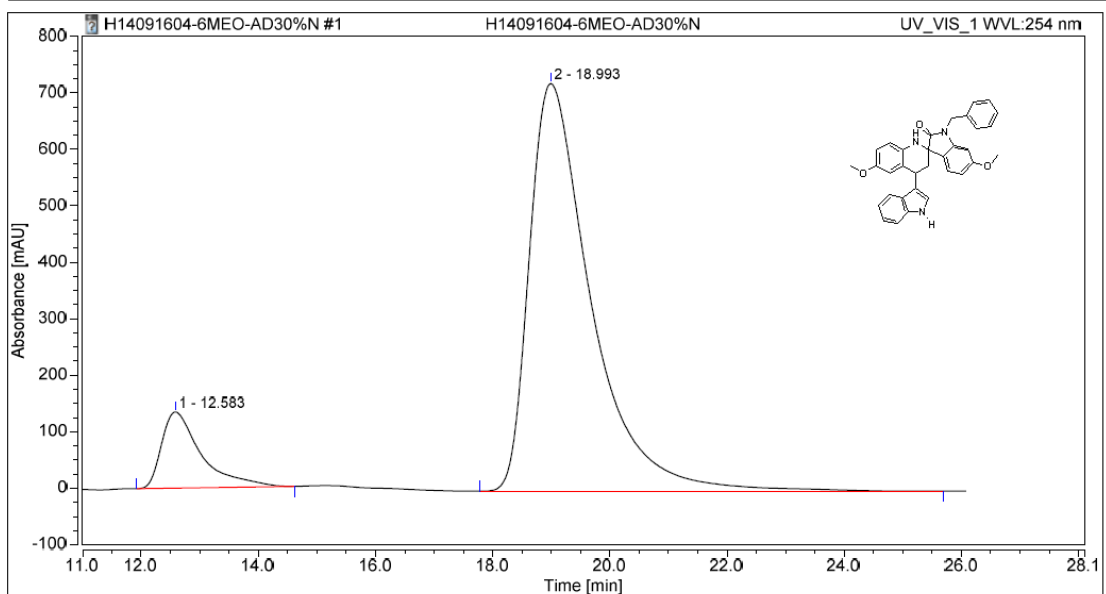

| Integration Results |           |                    |                |                |                 |                   |             |
|---------------------|-----------|--------------------|----------------|----------------|-----------------|-------------------|-------------|
| No.                 | Peak Name | Retention Time min | Area mAU*min   | Height mAU     | Relative Area % | Relative Height % | Amount n.a. |
| 1                   |           | 12.583             | 105.822        | 134.781        | 10.73           | 15.74             | n.a.        |
| 2                   |           | 18.993             | 880.716        | 721.714        | 89.27           | 84.26             | n.a.        |
| <b>Total:</b>       |           |                    | <b>986.537</b> | <b>856.495</b> | <b>100.00</b>   | <b>100.00</b>     |             |

### 3la

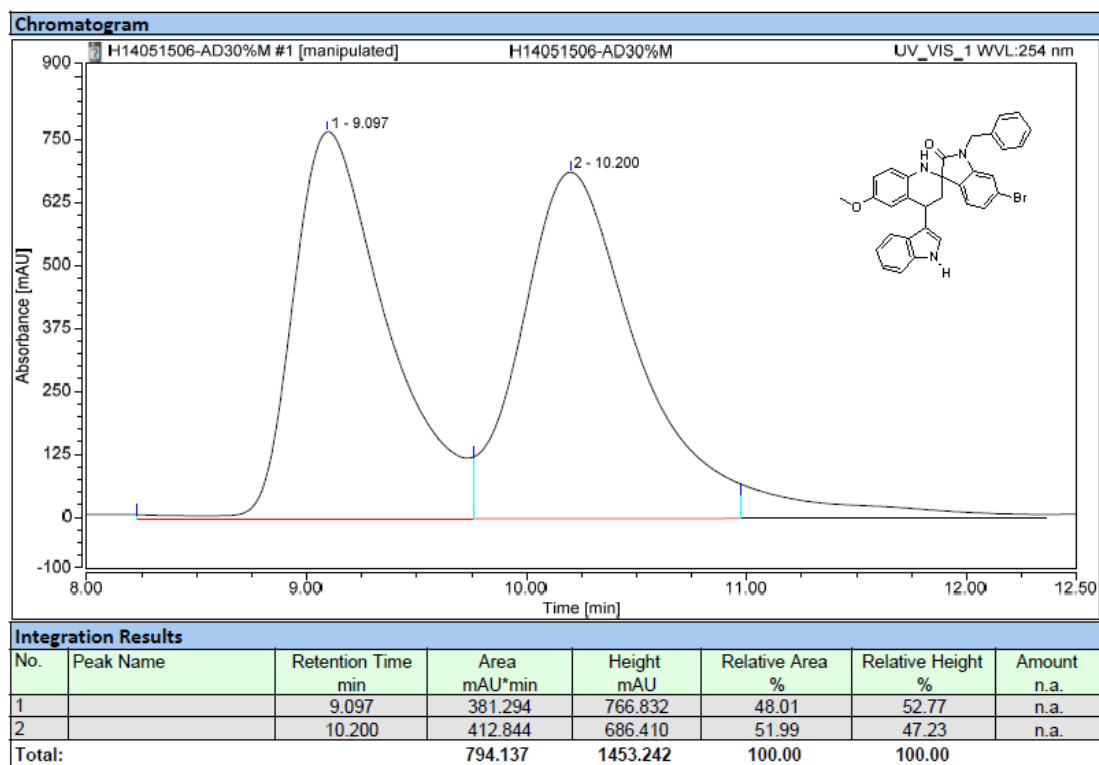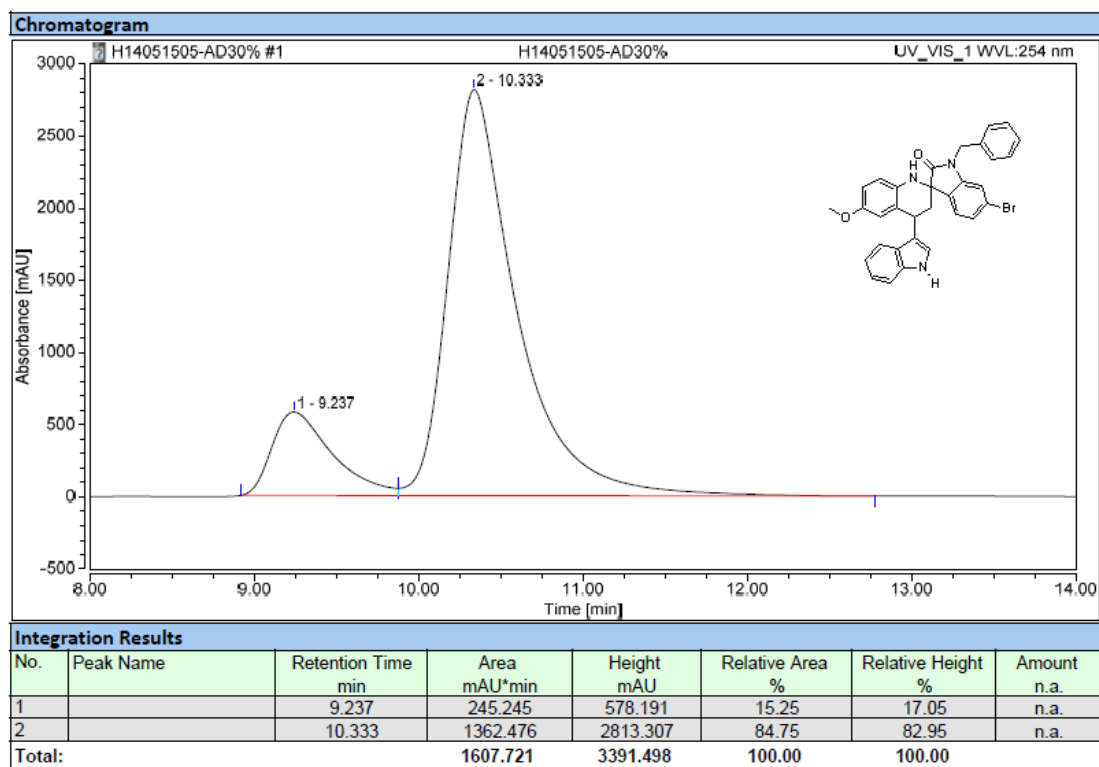



### 3ma

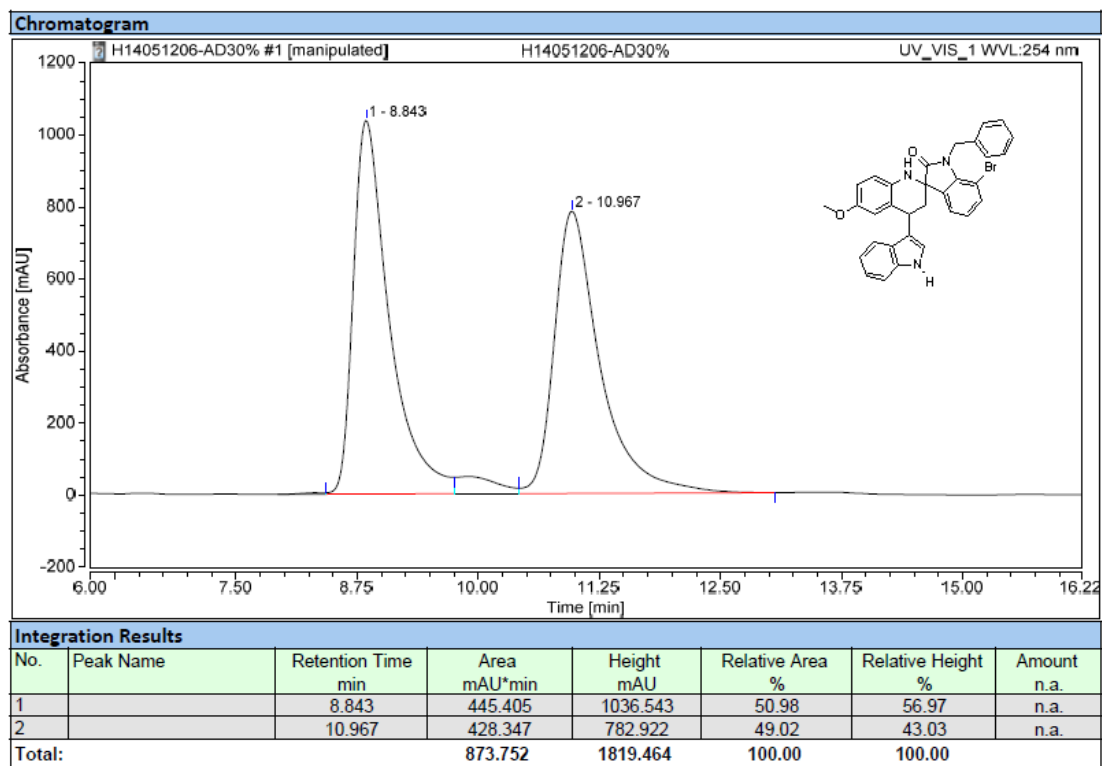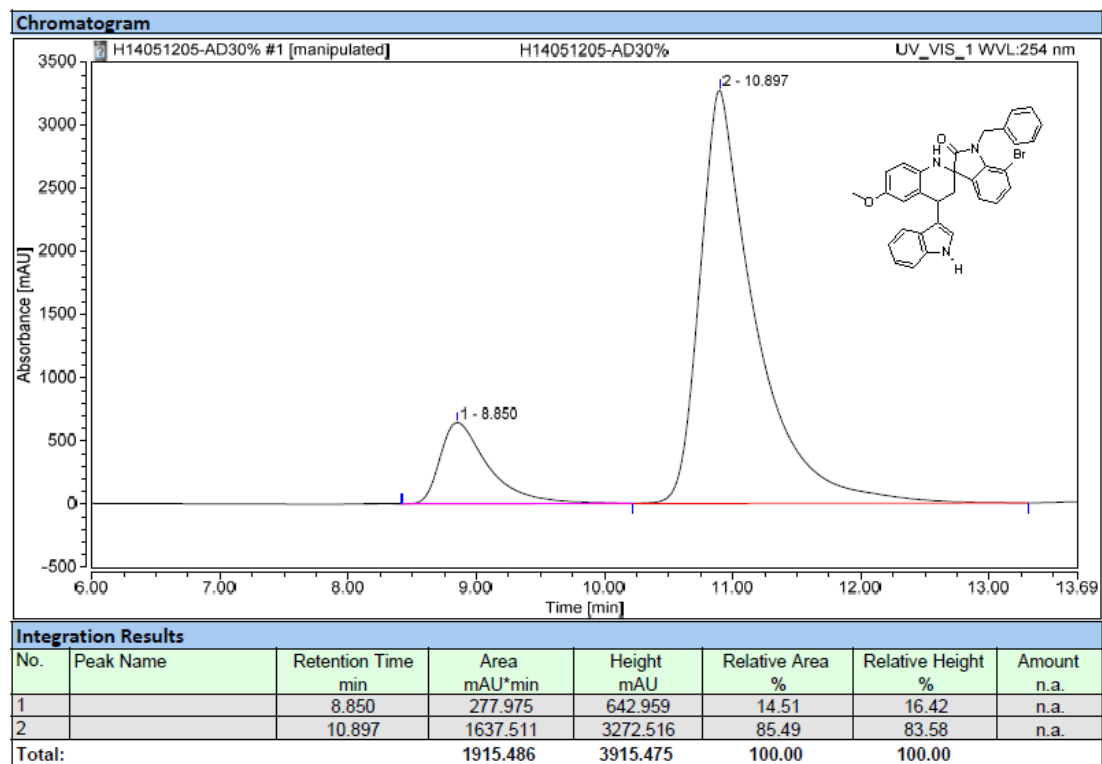

### 3na

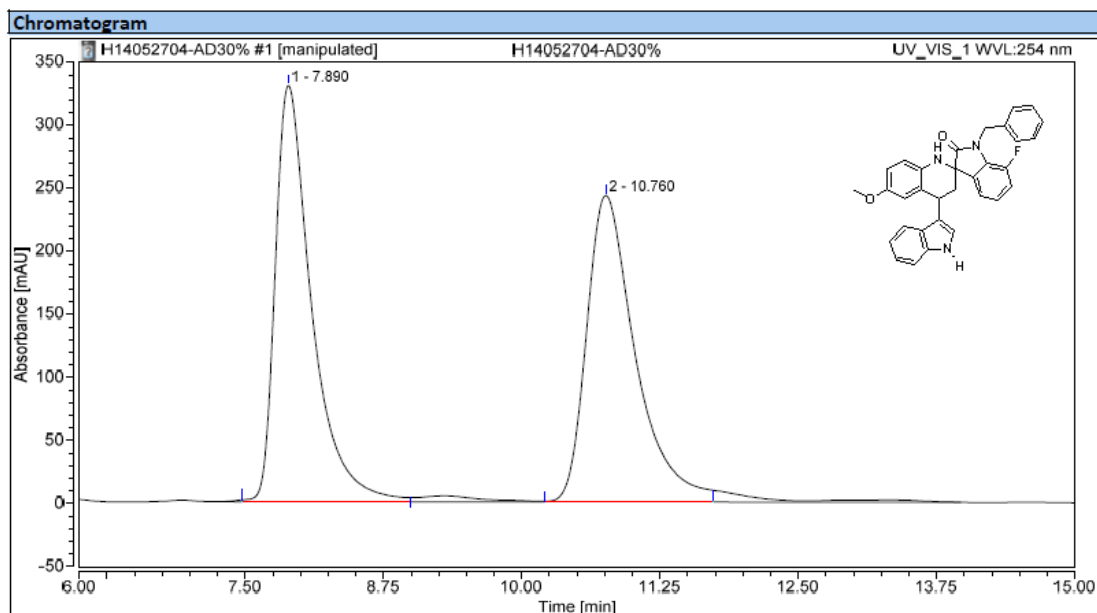

**Integration Results**

| No.    | Peak Name | Retention Time<br>min | Area<br>mAU*min | Height<br>mAU | Relative Area<br>% | Relative Height<br>% | Amount<br>n.a. |
|--------|-----------|-----------------------|-----------------|---------------|--------------------|----------------------|----------------|
| 1      |           | 7.890                 | 125.484         | 330.263       | 50.33              | 57.59                | n.a.           |
| 2      |           | 10.760                | 123.853         | 243.162       | 49.67              | 42.41                | n.a.           |
| Total: |           |                       | 249.337         | 573.424       | 100.00             | 100.00               |                |

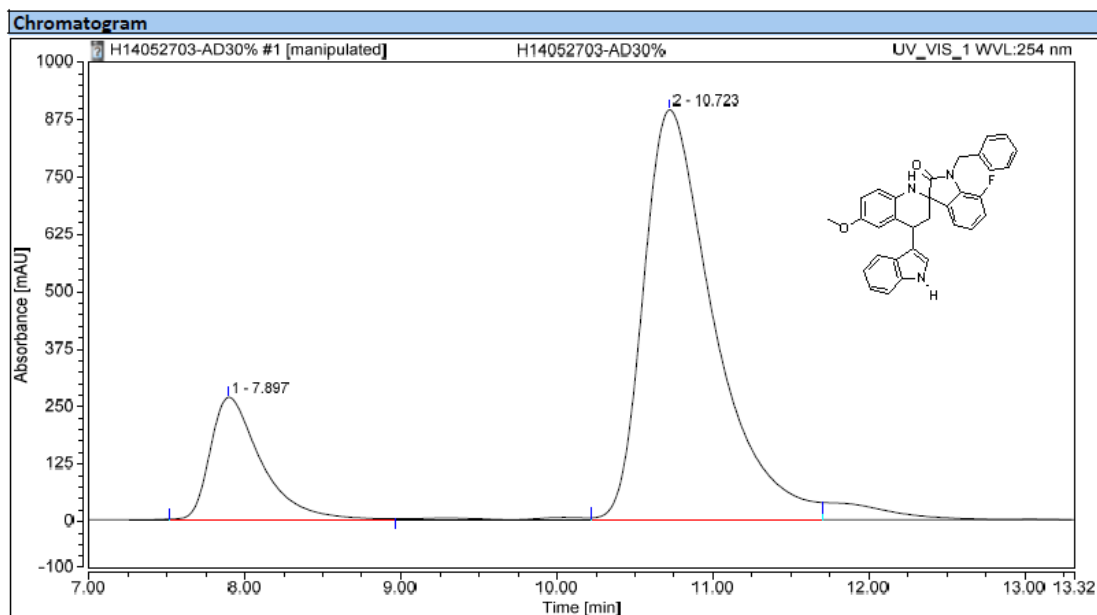

**Integration Results**

| No.    | Peak Name | Retention Time<br>min | Area<br>mAU*min | Height<br>mAU | Relative Area<br>% | Relative Height<br>% | Amount<br>n.a. |
|--------|-----------|-----------------------|-----------------|---------------|--------------------|----------------------|----------------|
| 1      |           | 7.897                 | 101.426         | 266.750       | 17.87              | 23.01                | n.a.           |
| 2      |           | 10.723                | 466.203         | 892.567       | 82.13              | 76.99                | n.a.           |
| Total: |           |                       | 567.630         | 1159.318      | 100.00             | 100.00               |                |

30a

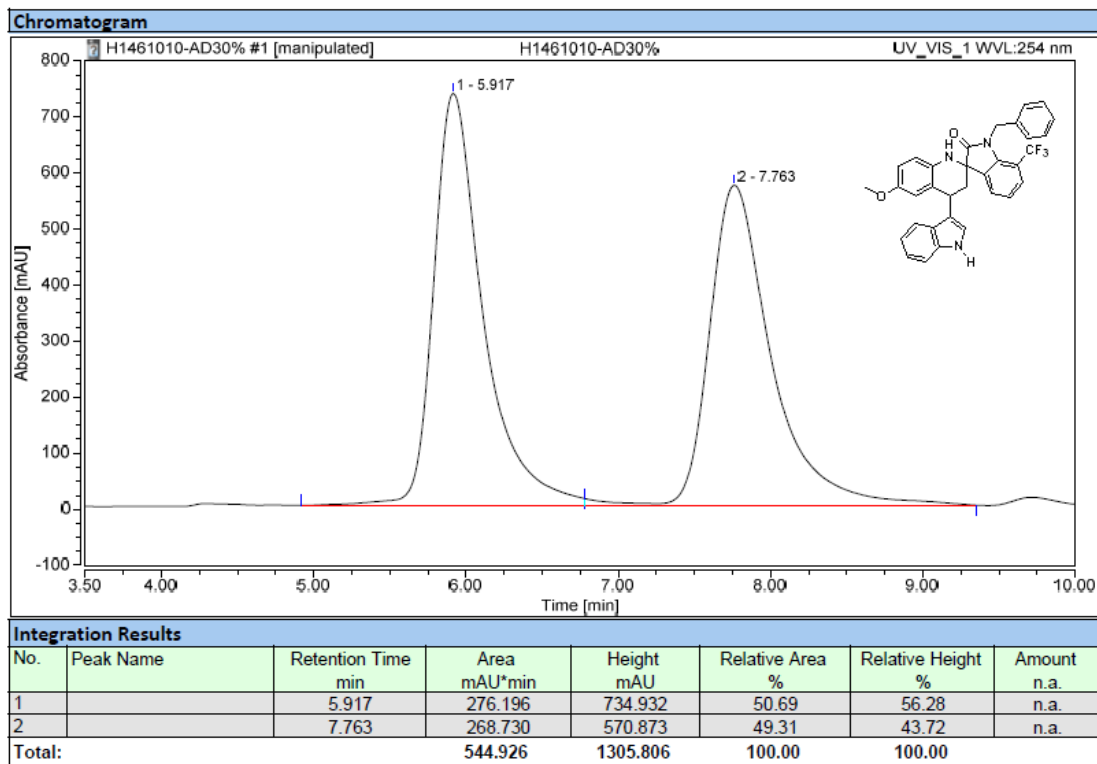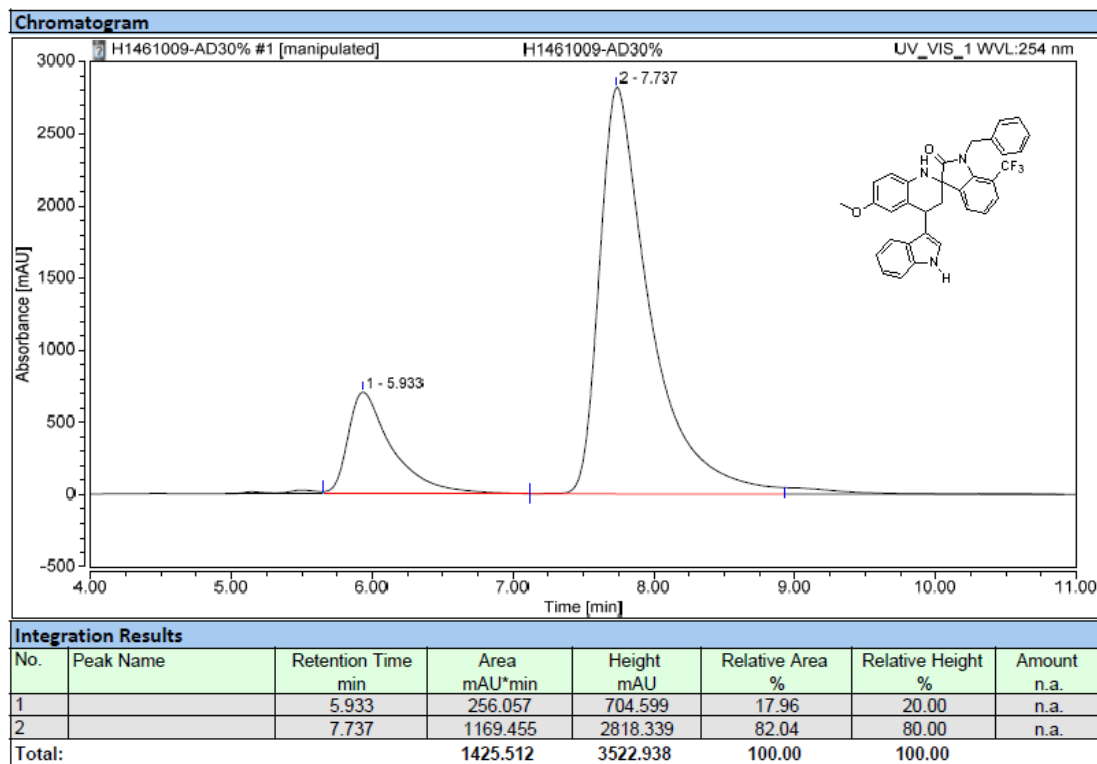

3pa

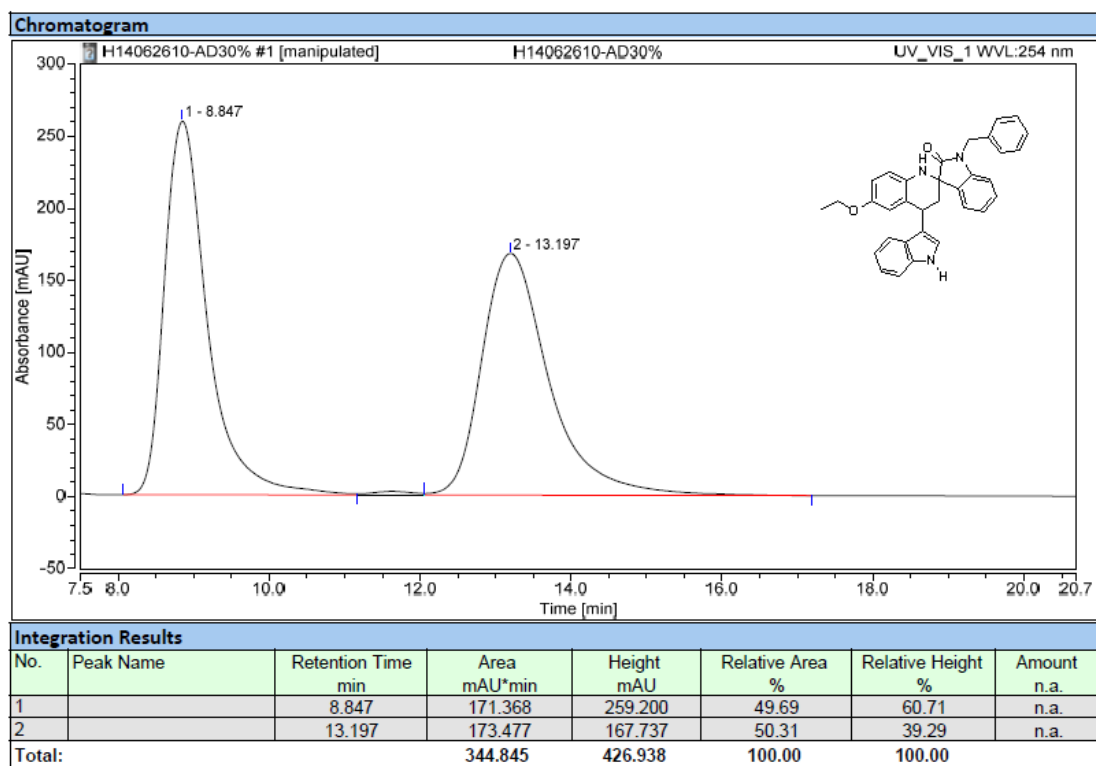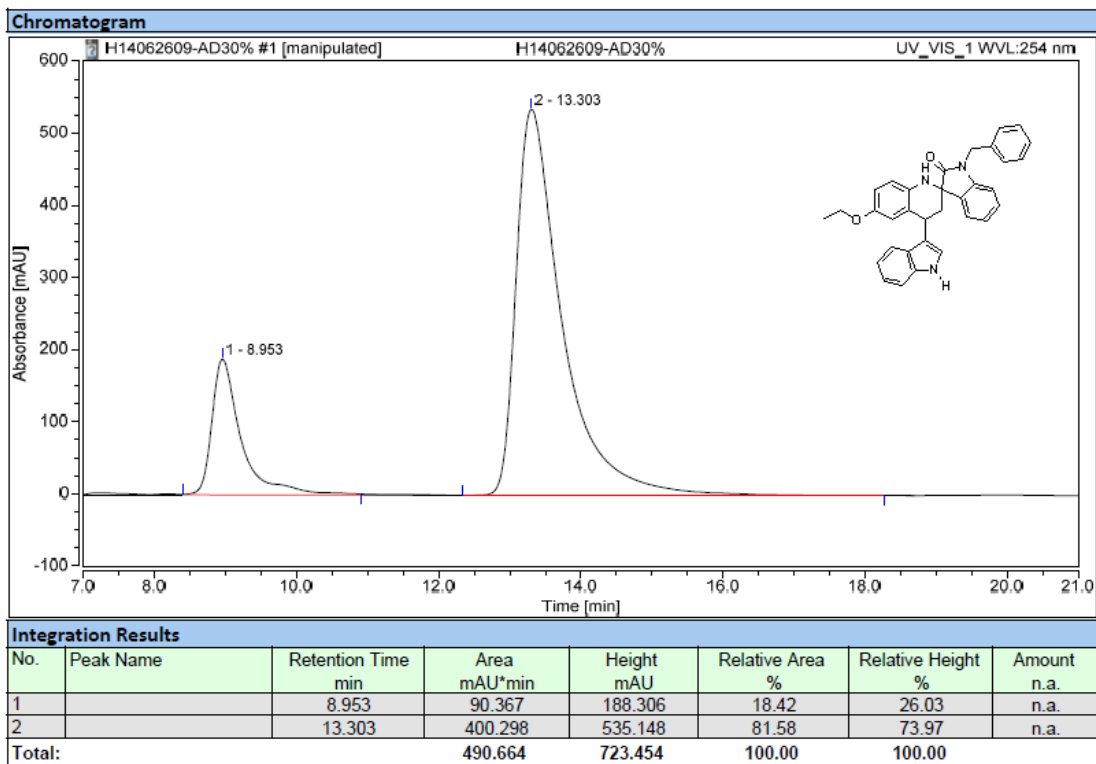

### 3qa

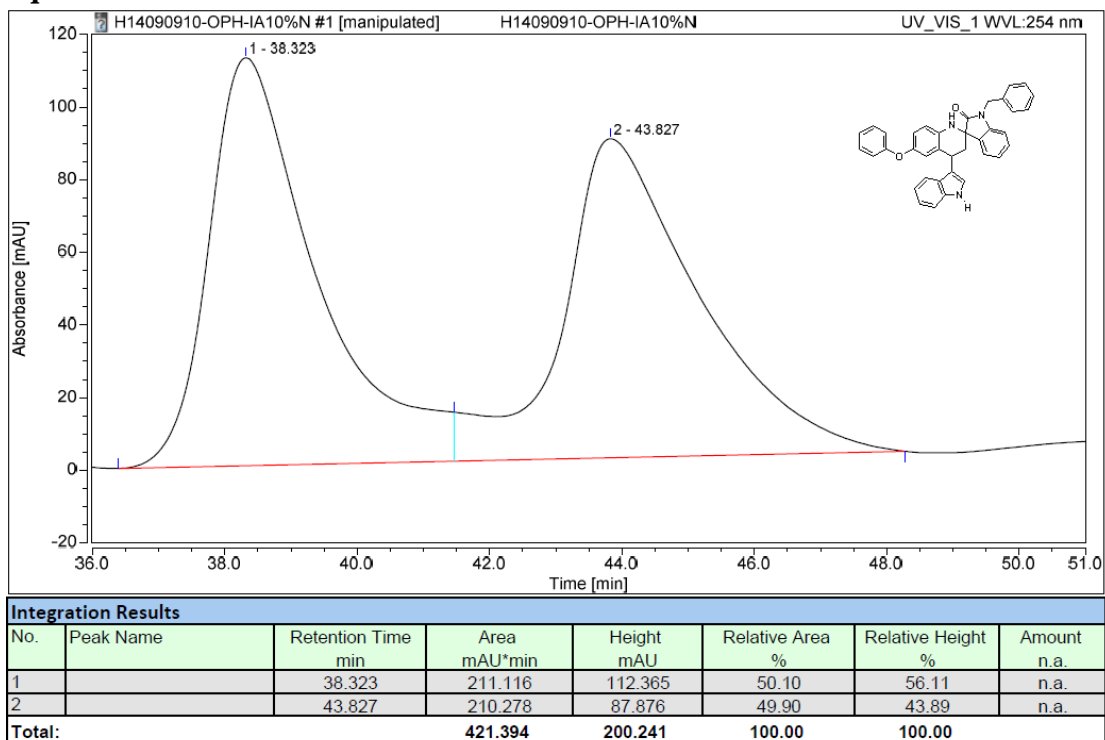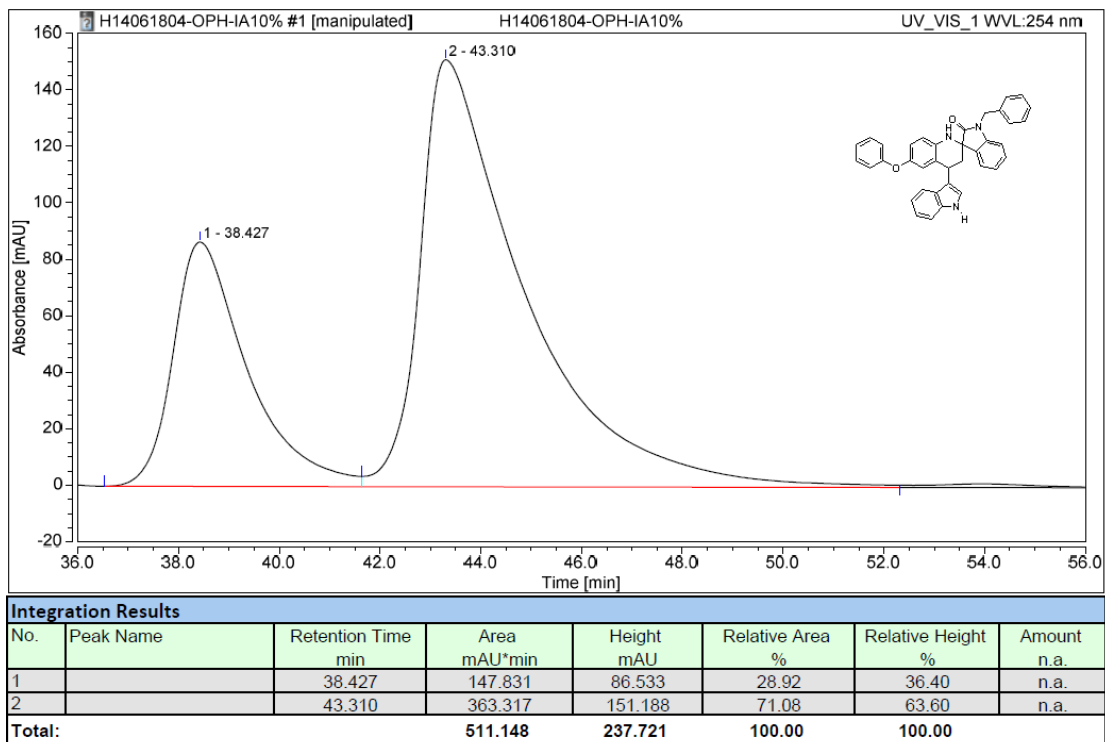

### 3ra

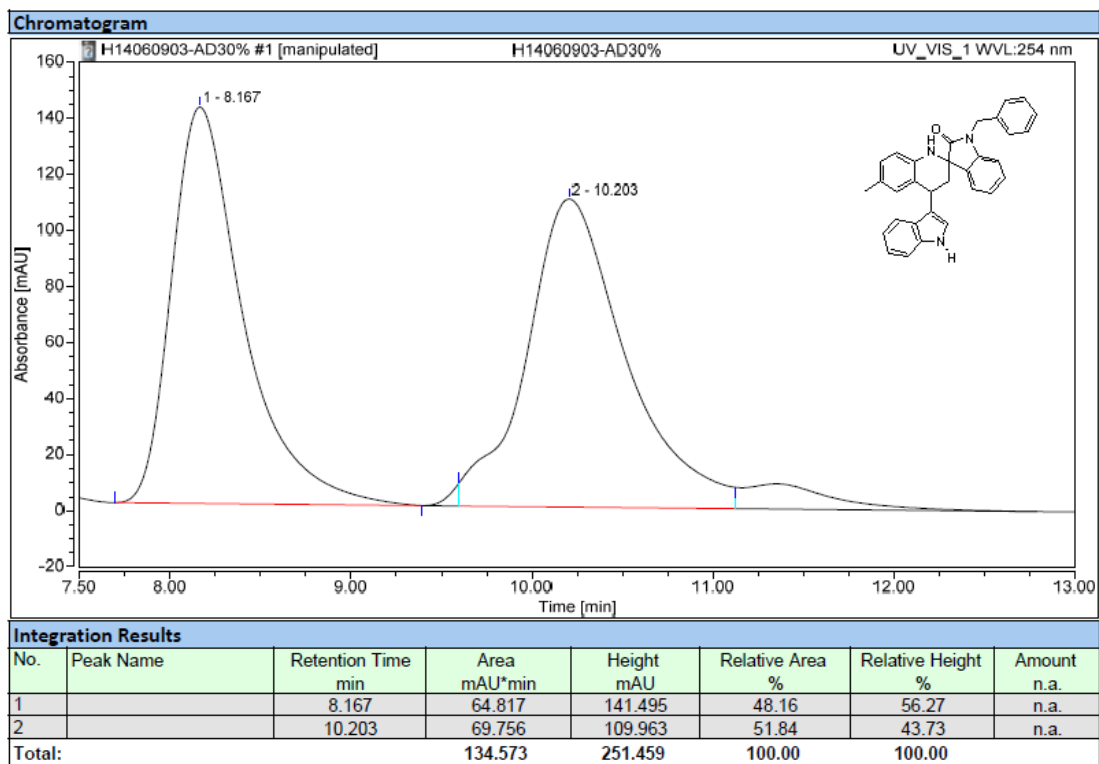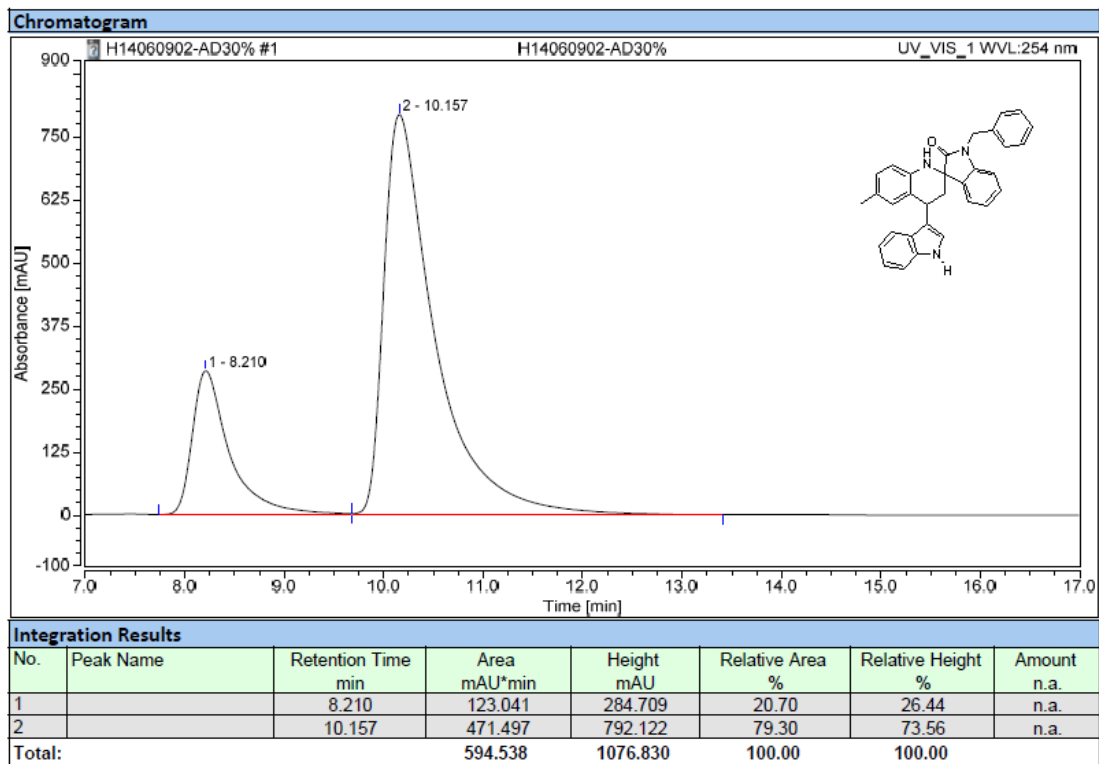

3sa

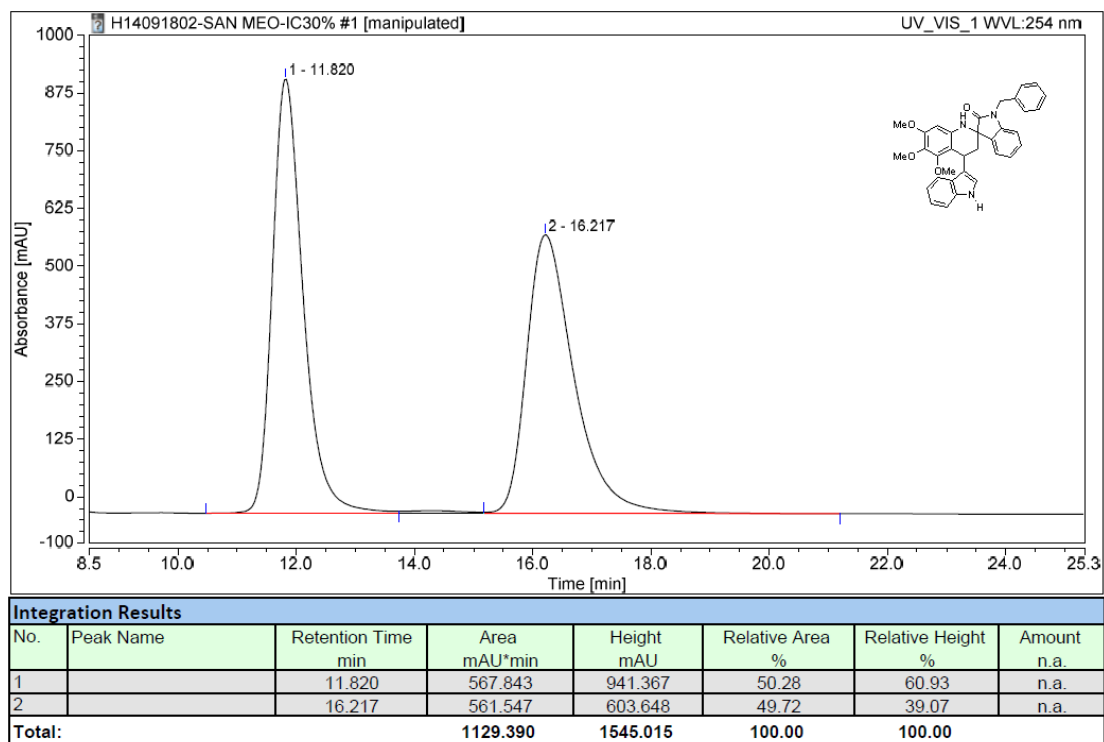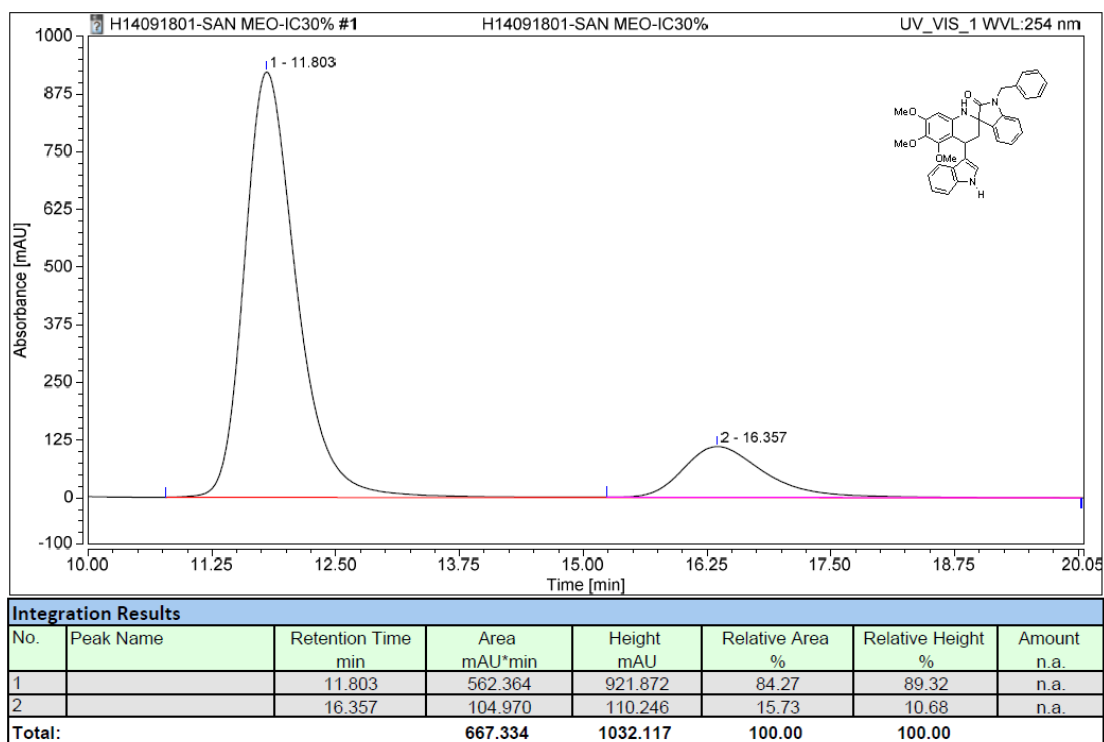

### 3ab

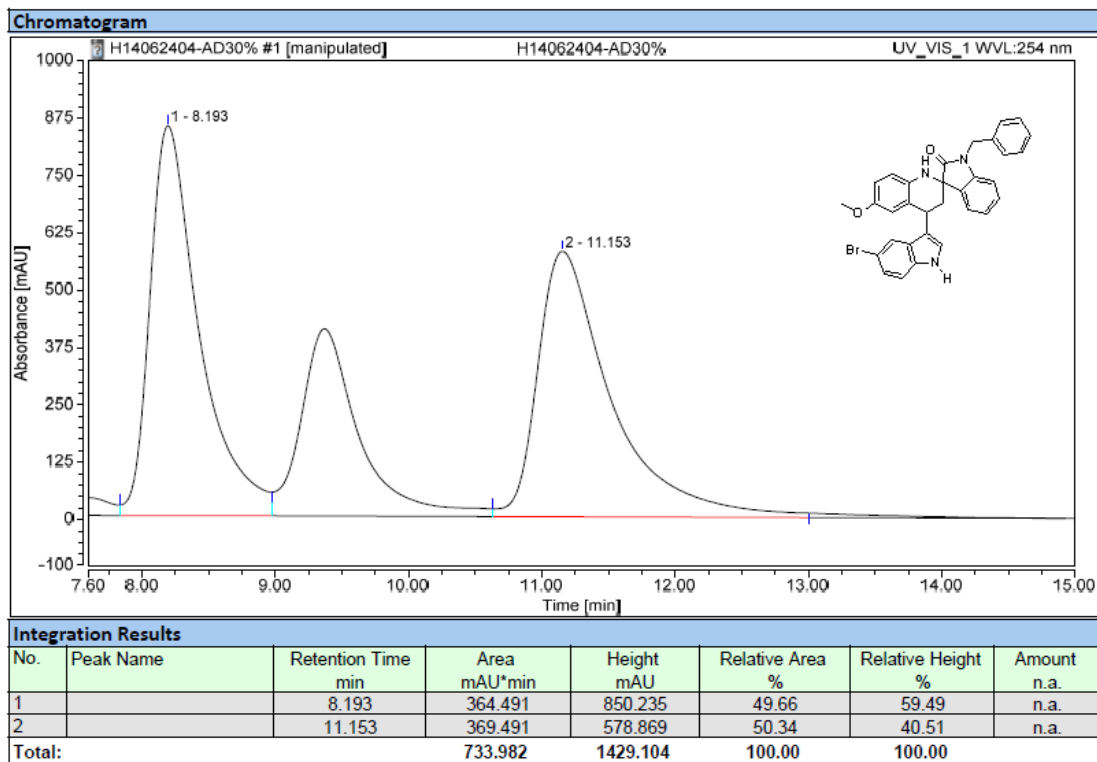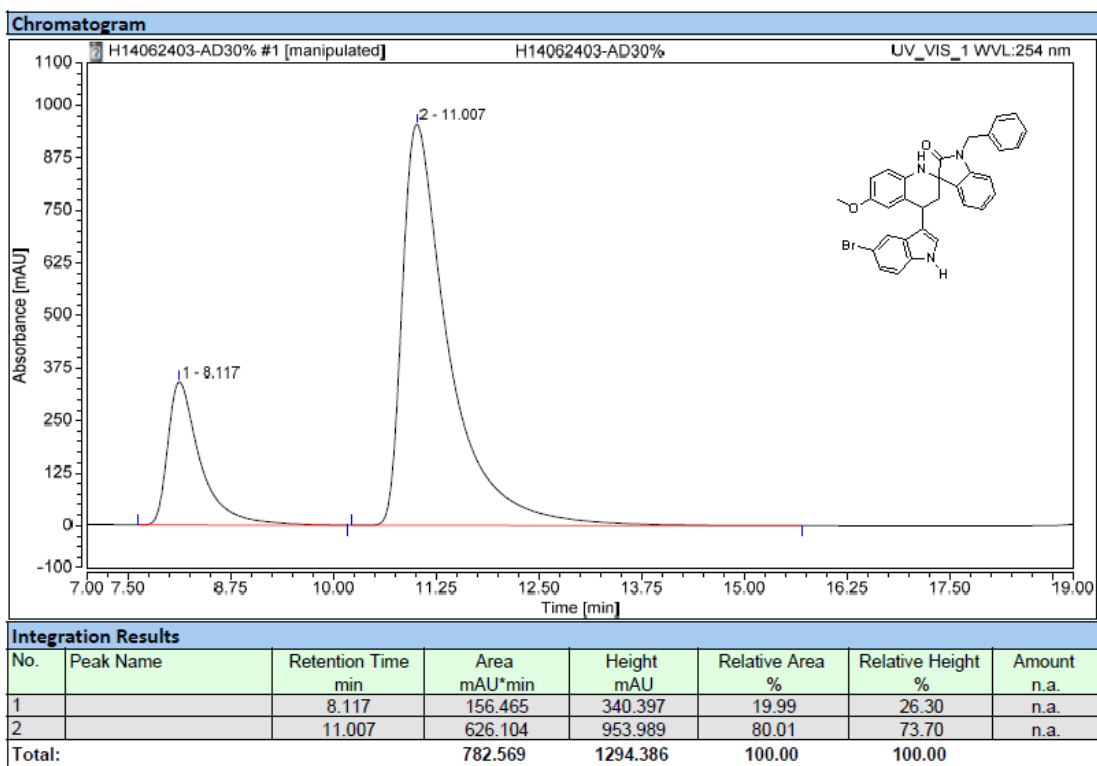

Supplement: c4ob01741b1.pdf [file c4ob01741b1.pdf]
